# Supplementary material for: Synthesis of 1,2,4,5-tetrasubstituted imidazoles using 2,6-dimethylpyridinium trinitromethanide {[2,6-DMPyH]C(NO2)3} as a novel nanostructured molten salt and green catalyst
Source: Royal Society of Chemistry journal article supplement (doi:10.1039/c5ra03241e), 2015-01-01

**Synthesis of 1,2,4,5-tetrasubstituted imidazole derivatives using novel nanostructured molten salt 2,6-dimethylpyridinium trinitromethanide {[2,6-DMPyH]C(NO<sub>2</sub>)<sub>3</sub>} as an eco-friendly and green catalyst**

Mohammad Ali Zolfigol,<sup>\*a</sup> Saeed Baghery,<sup>a</sup> Ahmad Reza Moosavi-Zare,<sup>\*b</sup> Seyed Mohammad Vahdat<sup>c</sup>

<sup>a</sup> Faculty of Chemistry, Bu-Ali Sina University, Hamedan 6517838683, Iran

<sup>b</sup> Department of Chemistry, University of Sayyed Jamaledin Asadabadi, Asadabad 6541835583, Iran

<sup>c</sup> Department of Chemistry, Ayatollah Amoli Branch, Islamic Azad University, P.O. Box 678, Amol, Iran

<sup>\*</sup>Corresponding Author: Fax: +988138257407

E-mail: zolfi@basu.ac.ir and mzolfigol@yahoo.com (M.A. Zolfigol); moosavizare@yahoo.com (A.R. Moosavi-Zare).

## Table of Contents

|                                                                                                                                                                                                                                                                       |    |
|-----------------------------------------------------------------------------------------------------------------------------------------------------------------------------------------------------------------------------------------------------------------------|----|
| Fig. S1. The mass spectrum of 2,6-dimethylpyridinium trinitromethanide {[2,6-DMPyH]C(NO <sub>2</sub> ) <sub>3</sub> } as a novel nano molten salt catalyst .....                                                                                                      | 6  |
| Fig. S2. The mass spectrum of 2,6-dimethylpyridinium trinitromethanide {[2,6-DMPyH]C(NO <sub>2</sub> ) <sub>3</sub> } as a novel nano molten salt catalyst .....                                                                                                      | 6  |
| Fig. S3. The thermal gravimetry (TG) analysis of {[2,6-DMPyH]C(NO <sub>2</sub> ) <sub>3</sub> } as a nanostructure molten salt catalyst .....                                                                                                                         | 7  |
| Fig. S4. The derivative thermal gravimetry (DTG) analysis of {[2,6-DMPyH]C(NO <sub>2</sub> ) <sub>3</sub> } as a nanostructure molten salt catalyst .....                                                                                                             | 7  |
| Fig. S5. Proposed mechanism for the synthesis of 1,2,4,5-tetrasubstituted imidazole derivatives in the presence of {[2,6-DMPyH]C(NO <sub>2</sub> ) <sub>3</sub> } as a nanostructure MS .....                                                                         | 8  |
| Fig. S6. Reusability of nanostructure MS catalyst in 6 minutes (using benzil) and 8 minutes (using benzoin) .....                                                                                                                                                     | 8  |
| Fig. S7. The IR spectrum of 2,6-dimethylpyridinium trinitromethanide {[2,6-DMPyH]C(NO <sub>2</sub> ) <sub>3</sub> } as a novel nano molten salt catalyst after recycling .....                                                                                        | 9  |
| Fig. S8. The <sup>1</sup> H NMR spectrum of 2,6-dimethylpyridinium trinitromethanide {[2,6-DMPyH]C(NO <sub>2</sub> ) <sub>3</sub> } as a novel nano molten salt catalyst after recycling .....                                                                        | 10 |
| Fig. S9. The <sup>13</sup> C NMR spectrum of 2,6-dimethylpyridinium trinitromethanide {[2,6-DMPyH]C(NO <sub>2</sub> ) <sub>3</sub> } as a novel nano molten salt catalyst after recycling .....                                                                       | 11 |
| Fig. S10. The scanning electron microscopy (SEM) (a and b) and transmission electron microscopy (TEM) (c and d) of 2,6-dimethylpyridinium trinitromethanide {[2,6-DMPyH]C(NO <sub>2</sub> ) <sub>3</sub> } as a novel nano molten salt catalyst after recycling ..... | 12 |
| Fig. S11. The IR spectrum of 2-(4-nitrophenyl)-4,5-diphenyl-1- <i>p</i> -tolyl-1 <i>H</i> -imidazole (Table 4, entry 1) .....                                                                                                                                         | 12 |
| Fig. S12. The <sup>1</sup> H NMR spectrum of 2-(4-nitrophenyl)-4,5-diphenyl-1- <i>p</i> -tolyl-1 <i>H</i> -imidazole (Table 4, entry 1) .....                                                                                                                         | 13 |
| Fig. S13. The <sup>1</sup> H NMR spectrum of 2-(4-nitrophenyl)-4,5-diphenyl-1- <i>p</i> -tolyl-1 <i>H</i> -imidazole (Table 4, entry 1) .....                                                                                                                         | 14 |
| Fig. S14. The <sup>13</sup> C NMR spectrum of 2-(4-nitrophenyl)-4,5-diphenyl-1- <i>p</i> -tolyl-1 <i>H</i> -imidazole (Table 4, entry 1) .....                                                                                                                        | 15 |
| Fig. S15. The <sup>13</sup> C NMR spectrum of 2-(4-nitrophenyl)-4,5-diphenyl-1- <i>p</i> -tolyl-1 <i>H</i> -imidazole (Table 4, entry 1) .....                                                                                                                        | 16 |
| Fig. S16. The IR spectrum of 1-(4-chlorophenyl)-2-(4-nitrophenyl)-4,5-diphenyl-1 <i>H</i> -imidazole (Table 4, entry 2) .....                                                                                                                                         | 16 |
| Fig. S17. The <sup>1</sup> H NMR spectrum of 1-(4-chlorophenyl)-2-(4-nitrophenyl)-4,5-diphenyl-1 <i>H</i> -imidazole (Table 4, entry 2) .....                                                                                                                         | 17 |
| Fig. S18. The <sup>1</sup> H NMR spectrum of 1-(4-chlorophenyl)-2-(4-nitrophenyl)-4,5-diphenyl-1 <i>H</i> -imidazole (Table 4, entry 2) .....                                                                                                                         | 18 |
| Fig. S19. The <sup>13</sup> C NMR spectrum of 1-(4-chlorophenyl)-2-(4-nitrophenyl)-4,5-diphenyl-1 <i>H</i> -imidazole (Table 4, entry 2) .....                                                                                                                        | 19 |
| Fig. S20. The <sup>13</sup> C NMR spectrum of 21-(4-chlorophenyl)-2-(4-nitrophenyl)-4,5-diphenyl-1 <i>H</i> -imidazole (Table 4, entry 2) .....                                                                                                                       | 20 |
| Fig. S21. The mass spectrum of 1-(4-chlorophenyl)-2-(4-nitrophenyl)-4,5-diphenyl-1 <i>H</i> -imidazole (Table 4, entry 2) .....                                                                                                                                       | 20 |
| Fig. S22. The IR spectrum of 1-(4-bromophenyl)-2-(4-nitrophenyl)-4,5-diphenyl-1 <i>H</i> -imidazole (Table 4, entry 3) .....                                                                                                                                          | 21 |
| Fig. S23. The <sup>1</sup> H NMR spectrum of 1-(4-bromophenyl)-2-(4-nitrophenyl)-4,5-diphenyl-1 <i>H</i> -imidazole (Table 4, entry 3) .....                                                                                                                          | 22 |
| Fig. S24. The <sup>1</sup> H NMR spectrum of 1-(4-bromophenyl)-2-(4-nitrophenyl)-4,5-diphenyl-1 <i>H</i> -imidazole (Table 4, entry 3) .....                                                                                                                          | 23 |
| Fig. S25. The <sup>13</sup> C NMR spectrum of 1-(4-bromophenyl)-2-(4-nitrophenyl)-4,5-diphenyl-1 <i>H</i> -imidazole (Table 4, entry 3) .....                                                                                                                         | 24 |

|                                                                                                                                                     |    |
|-----------------------------------------------------------------------------------------------------------------------------------------------------|----|
| Fig. S26. The <sup>13</sup> C NMR spectrum of 1-(4-bromophenyl)-2-(4-nitrophenyl)-4,5-diphenyl-1 <i>H</i> -imidazole (Table 4, entry 3) .....       | 25 |
| Fig. S27. The mass spectrum of 1-(4-bromophenyl)-2-(4-nitrophenyl)-4,5-diphenyl-1 <i>H</i> -imidazole (Table 4, entry 3) .....                      | 25 |
| Fig. S28. The IR spectrum of 2-(4-chlorophenyl)-4,5-diphenyl-1- <i>p</i> -tolyl-1 <i>H</i> -imidazole (Table 4, entry 4) .....                      | 26 |
| Fig. S29. The <sup>1</sup> H NMR spectrum of 2-(4-chlorophenyl)-4,5-diphenyl-1- <i>p</i> -tolyl-1 <i>H</i> -imidazole (Table 4, entry 4) .....      | 27 |
| Fig. S30. The <sup>1</sup> H NMR spectrum of 2-(4-chlorophenyl)-4,5-diphenyl-1- <i>p</i> -tolyl-1 <i>H</i> -imidazole (Table 4, entry 4) .....      | 28 |
| Fig. S31. The <sup>13</sup> C NMR spectrum of 2-(4-chlorophenyl)-4,5-diphenyl-1- <i>p</i> -tolyl-1 <i>H</i> -imidazole (Table 4, entry 4) .....     | 29 |
| Fig. S32. The <sup>13</sup> C NMR spectrum of 2-(4-chlorophenyl)-4,5-diphenyl-1- <i>p</i> -tolyl-1 <i>H</i> -imidazole (Table 4, entry 4) .....     | 30 |
| Fig. S33. The IR spectrum of 1,2-bis(4-chlorophenyl)-4,5-diphenyl-1 <i>H</i> -imidazole (Table 4, entry 5) .....                                    | 30 |
| Fig. S34. The <sup>1</sup> H NMR spectrum of 1,2-bis(4-chlorophenyl)-4,5-diphenyl-1 <i>H</i> -imidazole (Table 4, entry 5) .....                    | 31 |
| Fig. S35. The <sup>1</sup> H NMR spectrum of 1,2-bis(4-chlorophenyl)-4,5-diphenyl-1 <i>H</i> -imidazole (Table 4, entry 5) .....                    | 32 |
| Fig. S36. The <sup>13</sup> C NMR spectrum of 1,2-bis(4-chlorophenyl)-4,5-diphenyl-1 <i>H</i> -imidazole (Table 4, entry 5) .....                   | 33 |
| Fig. S37. The <sup>13</sup> C NMR spectrum of 1,2-bis(4-chlorophenyl)-4,5-diphenyl-1 <i>H</i> -imidazole (Table 4, entry 5) .....                   | 34 |
| Fig. S38. The IR spectrum of 1-(4-bromophenyl)-2-(4-chlorophenyl)-4,5-diphenyl-1 <i>H</i> -imidazole (Table 4, entry 6) .....                       | 34 |
| Fig. S39. The <sup>1</sup> H NMR spectrum of 1-(4-bromophenyl)-2-(4-chlorophenyl)-4,5-diphenyl-1 <i>H</i> -imidazole (Table 4, entry 6) .....       | 35 |
| Fig. S40. The <sup>1</sup> H NMR spectrum of 1-(4-bromophenyl)-2-(4-chlorophenyl)-4,5-diphenyl-1 <i>H</i> -imidazole (Table 4, entry 6) .....       | 36 |
| Fig. S41. The <sup>13</sup> C NMR spectrum of 1-(4-bromophenyl)-2-(4-chlorophenyl)-4,5-diphenyl-1 <i>H</i> -imidazole (Table 4, entry 6) .....      | 37 |
| Fig. S42. The <sup>13</sup> C NMR spectrum of 1-(4-bromophenyl)-2-(4-chlorophenyl)-4,5-diphenyl-1 <i>H</i> -imidazole (Table 4, entry 6) .....      | 38 |
| Fig. S43. The mass spectrum of 1-(4-bromophenyl)-2-(4-chlorophenyl)-4,5-diphenyl-1 <i>H</i> -imidazole (Table 4, entry 6) .....                     | 38 |
| Fig. S44. The IR spectrum of 1-(4-chlorophenyl)-2-(2,4-dichlorophenyl)-4,5-diphenyl-1 <i>H</i> -imidazole (Table 4, entry 7) .....                  | 39 |
| Fig. S45. The <sup>1</sup> H NMR spectrum of 1-(4-chlorophenyl)-2-(2,4-dichlorophenyl)-4,5-diphenyl-1 <i>H</i> -imidazole (Table 4, entry 7) .....  | 40 |
| Fig. S46. The <sup>1</sup> H NMR spectrum of 1-(4-chlorophenyl)-2-(2,4-dichlorophenyl)-4,5-diphenyl-1 <i>H</i> -imidazole (Table 4, entry 7) .....  | 41 |
| Fig. S47. The <sup>13</sup> C NMR spectrum of 1-(4-chlorophenyl)-2-(2,4-dichlorophenyl)-4,5-diphenyl-1 <i>H</i> -imidazole (Table 4, entry 7) ..... | 42 |
| Fig. S48. The <sup>13</sup> C NMR spectrum of 1-(4-chlorophenyl)-2-(2,4-dichlorophenyl)-4,5-diphenyl-1 <i>H</i> -imidazole (Table 4, entry 7) ..... | 43 |
| Fig. S49. The mass spectrum of 1-(4-chlorophenyl)-2-(2,4-dichlorophenyl)-4,5-diphenyl-1 <i>H</i> -imidazole (Table 4, entry 7) .....                | 43 |
| Fig. S50. The IR spectrum of 1-(4-bromophenyl)-2-(2,4-dichlorophenyl)-4,5-diphenyl-1 <i>H</i> -imidazole (Table 4, entry 8) .....                   | 44 |
| Fig. S51. The <sup>1</sup> H NMR spectrum of 1-(4-bromophenyl)-2-(2,4-dichlorophenyl)-4,5-diphenyl-1 <i>H</i> -imidazole (Table 4, entry 8) .....   | 45 |

|                                                                                                                                                        |    |
|--------------------------------------------------------------------------------------------------------------------------------------------------------|----|
| Fig. S52. The <sup>1</sup> H NMR spectrum of 1-(4-bromophenyl)-2-(2,4-dichlorophenyl)-4,5-diphenyl-1 <i>H</i> -imidazole (Table 4, entry 8).....       | 46 |
| Fig. S53. The <sup>13</sup> C NMR spectrum of 1-(4-bromophenyl)-2-(2,4-dichlorophenyl)-4,5-diphenyl-1 <i>H</i> -imidazole (Table 4, entry 8).....      | 47 |
| Fig. S54. The <sup>13</sup> C NMR spectrum of 1-(4-bromophenyl)-2-(2,4-dichlorophenyl)-4,5-diphenyl-1 <i>H</i> -imidazole (Table 4, entry 8).....      | 48 |
| Fig. S55. The mass spectrum of 1-(4-bromophenyl)-2-(2,4-dichlorophenyl)-4,5-diphenyl-1 <i>H</i> -imidazole (Table 4, entry 8).....                     | 48 |
| Fig. S56. The IR spectrum of 1-(4-chlorophenyl)-4,5-diphenyl-2- <i>p</i> -tolyl-1 <i>H</i> -imidazole (Table 4, entry 9).....                          | 49 |
| Fig. S57. The <sup>1</sup> H NMR spectrum of 1-(4-chlorophenyl)-4,5-diphenyl-2- <i>p</i> -tolyl-1 <i>H</i> -imidazole (Table 4, entry 9).....          | 50 |
| Fig. S58. The <sup>1</sup> H NMR spectrum of 1-(4-chlorophenyl)-4,5-diphenyl-2- <i>p</i> -tolyl-1 <i>H</i> -imidazole (Table 4, entry 9).....          | 50 |
| Fig. S59. The <sup>13</sup> C NMR spectrum of 1-(4-chlorophenyl)-4,5-diphenyl-2- <i>p</i> -tolyl-1 <i>H</i> -imidazole (Table 4, entry 9).....         | 51 |
| Fig. S60. The <sup>13</sup> C NMR spectrum of 1-(4-chlorophenyl)-4,5-diphenyl-2- <i>p</i> -tolyl-1 <i>H</i> -imidazole (Table 4, entry 9).....         | 52 |
| Fig. S61. The IR spectrum of 1-(4-bromophenyl)-4,5-diphenyl-2- <i>p</i> -tolyl-1 <i>H</i> -imidazole (Table 4, entry 10).....                          | 52 |
| Fig. S62. The <sup>1</sup> H NMR spectrum of 1-(4-bromophenyl)-4,5-diphenyl-2- <i>p</i> -tolyl-1 <i>H</i> -imidazole (Table 4, entry 10).....          | 53 |
| Fig. S63. The <sup>1</sup> H NMR spectrum of 1-(4-bromophenyl)-4,5-diphenyl-2- <i>p</i> -tolyl-1 <i>H</i> -imidazole (Table 4, entry 10).....          | 54 |
| Fig. S64. The <sup>13</sup> C NMR spectrum of 1-(4-bromophenyl)-4,5-diphenyl-2- <i>p</i> -tolyl-1 <i>H</i> -imidazole (Table 4, entry 10).....         | 55 |
| Fig. S65. The <sup>13</sup> C NMR spectrum of 1-(4-bromophenyl)-4,5-diphenyl-2- <i>p</i> -tolyl-1 <i>H</i> -imidazole (Table 4, entry 10).....         | 56 |
| Fig. S66. The mass spectrum of 1-(4-bromophenyl)-4,5-diphenyl-2- <i>p</i> -tolyl-1 <i>H</i> -imidazole (Table 4, entry 10).....                        | 56 |
| Fig. S67. The IR spectrum of 1-(4-bromophenyl)-2-(4-methoxyphenyl)-4,5-diphenyl-1 <i>H</i> -imidazole (Table 4, entry 11).....                         | 57 |
| Fig. S68. The <sup>1</sup> H NMR spectrum of 1-(4-bromophenyl)-2-(4-methoxyphenyl)-4,5-diphenyl-1 <i>H</i> -imidazole (Table 4, entry 11).....         | 58 |
| Fig. S69. The <sup>1</sup> H NMR spectrum of 1-(4-bromophenyl)-2-(4-methoxyphenyl)-4,5-diphenyl-1 <i>H</i> -imidazole (Table 4, entry 11).....         | 59 |
| Fig. S70. The <sup>13</sup> C NMR spectrum of 1-(4-bromophenyl)-2-(4-methoxyphenyl)-4,5-diphenyl-1 <i>H</i> -imidazole (Table 4, entry 11).....        | 60 |
| Fig. S71. The <sup>13</sup> C NMR spectrum of 1-(4-bromophenyl)-2-(4-methoxyphenyl)-4,5-diphenyl-1 <i>H</i> -imidazole (Table 4, entry 11).....        | 61 |
| Fig. S72. The mass spectrum of 1-(4-bromophenyl)-2-(4-methoxyphenyl)-4,5-diphenyl-1 <i>H</i> -imidazole (Table 4, entry 11).....                       | 61 |
| Fig. S73. The IR spectrum of 1-(4-bromophenyl)-2-(4-chloro-3-nitrophenyl)-4,5-diphenyl-1 <i>H</i> -imidazole (Table 4, entry 12).....                  | 62 |
| Fig. S74. The <sup>1</sup> H NMR spectrum of 1-(4-bromophenyl)-2-(4-chloro-3-nitrophenyl)-4,5-diphenyl-1 <i>H</i> -imidazole (Table 4, entry 12).....  | 63 |
| Fig. S75. The <sup>1</sup> H NMR spectrum of 1-(4-bromophenyl)-2-(4-chloro-3-nitrophenyl)-4,5-diphenyl-1 <i>H</i> -imidazole (Table 4, entry 12).....  | 64 |
| Fig. S76. The <sup>13</sup> C NMR spectrum of 1-(4-bromophenyl)-2-(4-chloro-3-nitrophenyl)-4,5-diphenyl-1 <i>H</i> -imidazole (Table 4, entry 12)..... | 65 |
| Fig. S77. The <sup>13</sup> C NMR spectrum of 1-(4-bromophenyl)-2-(4-chloro-3-nitrophenyl)-4,5-diphenyl-1 <i>H</i> -imidazole (Table 4, entry 12)..... | 65 |

|                                                                                                                                                  |    |
|--------------------------------------------------------------------------------------------------------------------------------------------------|----|
| Fig. S78. The mass spectrum of 1-(4-bromophenyl)-2-(4-chloro-3-nitrophenyl)-4,5-diphenyl-1 <i>H</i> -imidazole (Table 4, entry 12).....          | 66 |
| Fig. S79. The IR spectrum of 2-(biphenyl-4-yl)-1-(4-bromophenyl)-4,5-diphenyl-1 <i>H</i> -imidazole (Table 4, entry 13) .....                    | 67 |
| Fig. S80. The <sup>1</sup> H NMR spectrum of 2-(biphenyl-4-yl)-1-(4-bromophenyl)-4,5-diphenyl-1 <i>H</i> -imidazole (Table 4, entry 13) .....    | 68 |
| Fig. S81. The <sup>1</sup> H NMR spectrum of 2-(biphenyl-4-yl)-1-(4-bromophenyl)-4,5-diphenyl-1 <i>H</i> -imidazole (Table 4, entry 13) .....    | 69 |
| Fig. S82. The <sup>13</sup> C NMR spectrum of 2-(biphenyl-4-yl)-1-(4-bromophenyl)-4,5-diphenyl-1 <i>H</i> -imidazole (Table 4, entry 13) .....   | 70 |
| Fig. S83. The <sup>13</sup> C NMR spectrum of 2-(biphenyl-4-yl)-1-(4-bromophenyl)-4,5-diphenyl-1 <i>H</i> -imidazole (Table 4, entry 13) .....   | 71 |
| Fig. S84. The mass spectrum of 2-(biphenyl-4-yl)-1-(4-bromophenyl)-4,5-diphenyl-1 <i>H</i> -imidazole (Table 4, entry 13) .....                  | 71 |
| Fig. S85. The IR spectrum of 1-(4-bromophenyl)-2-(naphthalen-2-yl)-4,5-diphenyl-1 <i>H</i> -imidazole (Table 4, entry 14) .....                  | 72 |
| Fig. S86. The <sup>1</sup> H NMR spectrum of 1-(4-bromophenyl)-2-(naphthalen-2-yl)-4,5-diphenyl-1 <i>H</i> -imidazole (Table 4, entry 14) .....  | 73 |
| Fig. S87. The <sup>1</sup> H NMR spectrum of 1-(4-bromophenyl)-2-(naphthalen-2-yl)-4,5-diphenyl-1 <i>H</i> -imidazole (Table 4, entry 14) .....  | 74 |
| Fig. S88. The <sup>13</sup> C NMR spectrum of 1-(4-bromophenyl)-2-(naphthalen-2-yl)-4,5-diphenyl-1 <i>H</i> -imidazole (Table 4, entry 14) ..... | 75 |
| Fig. S89. The <sup>13</sup> C NMR spectrum of 1-(4-bromophenyl)-2-(naphthalen-2-yl)-4,5-diphenyl-1 <i>H</i> -imidazole (Table 4, entry 14) ..... | 76 |
| Fig. S90. The mass spectrum of 1-(4-bromophenyl)-2-(naphthalen-2-yl)-4,5-diphenyl-1 <i>H</i> -imidazole (Table 4, entry 14) .....                | 76 |

**Supplementary data:**

**Fig. S1.** The mass spectrum of 2,6-dimethylpyridinium trinitromethanide {[2,6-DMPyH]C(NO<sub>2</sub>)<sub>3</sub>} as a novel nano molten salt catalyst

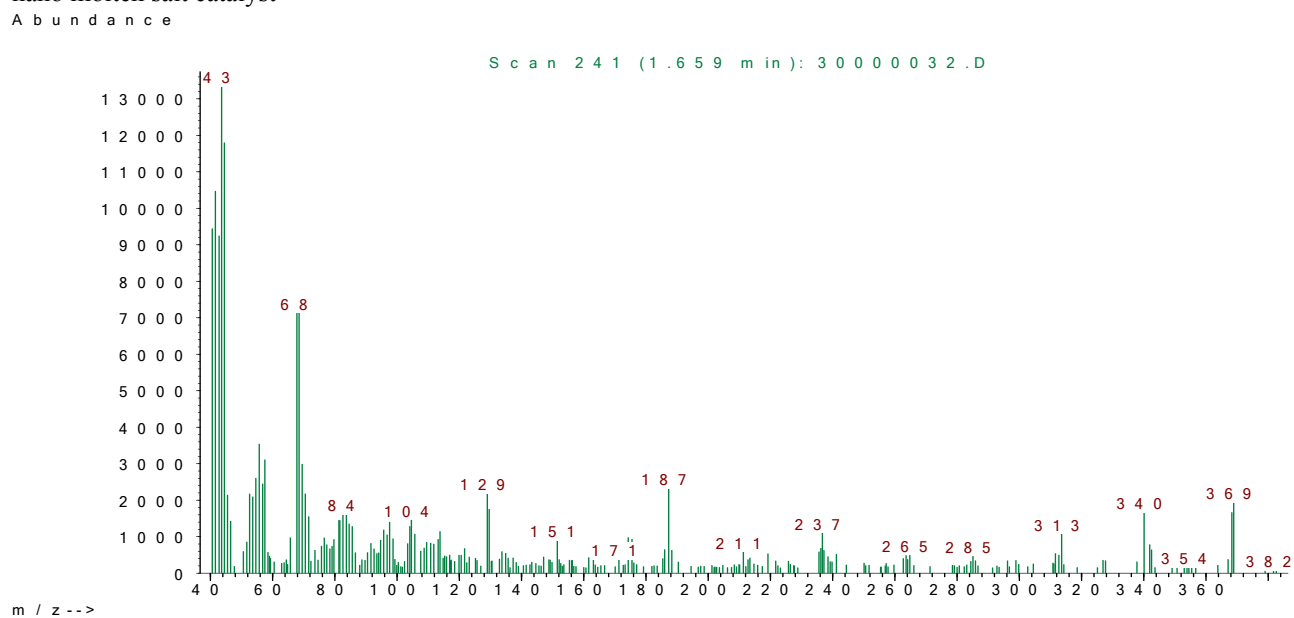

**Fig. S2.** The mass spectrum of 2,6-dimethylpyridinium trinitromethanide {[2,6-DMPyH]C(NO<sub>2</sub>)<sub>3</sub>} as a novel nano molten salt catalyst

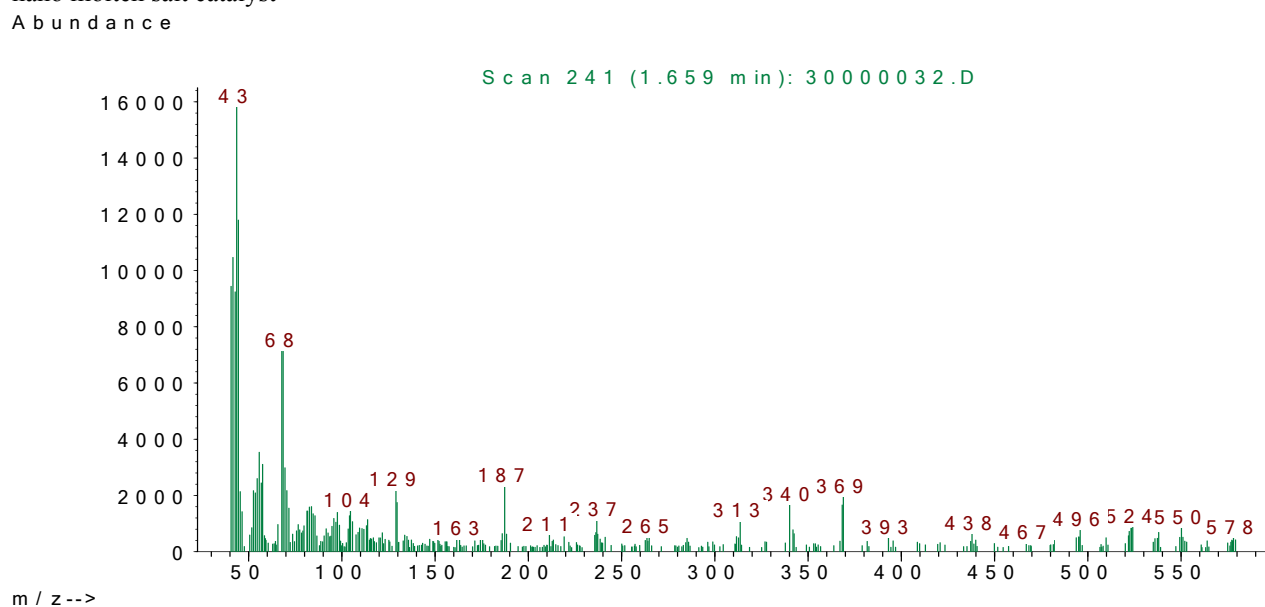

**Fig. S3.** The thermal gravimetry (TG) analysis of {[2,6-DMPyH]C(NO<sub>2</sub>)<sub>3</sub>} as a nanostructure molten salt catalyst

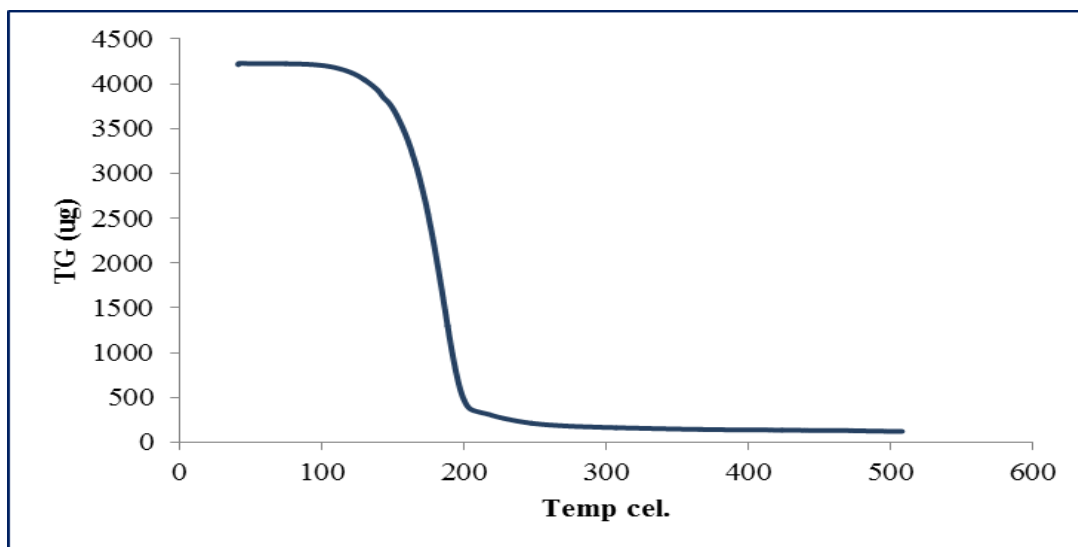

**Fig. S4.** The derivative thermal gravimetry (DTG) analysis of {[2,6-DMPyH]C(NO<sub>2</sub>)<sub>3</sub>} as a nanostructure molten salt catalyst

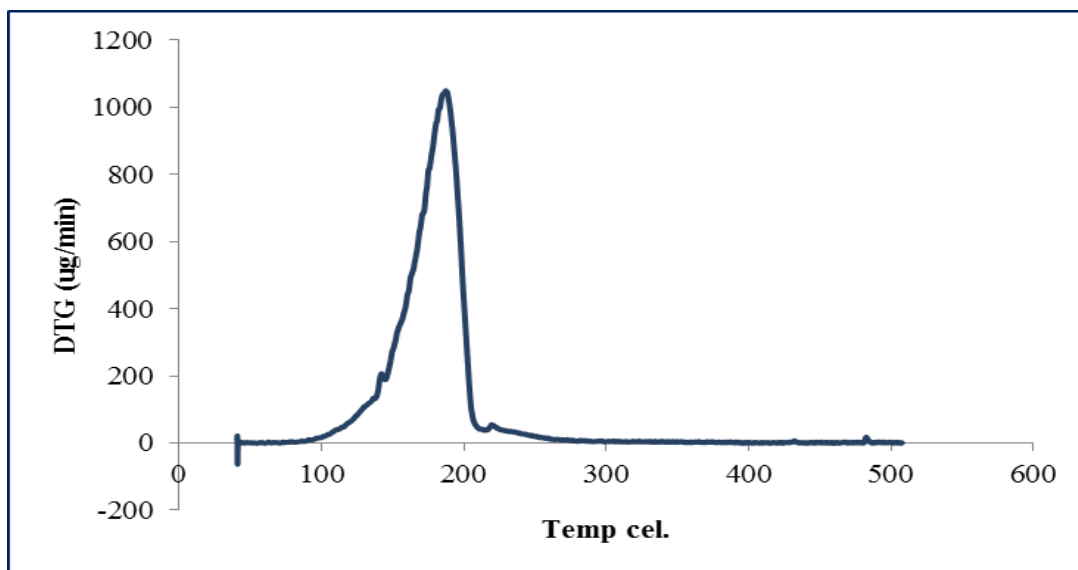

**Fig. S5.** Proposed mechanism for the synthesis of 1,2,4,5-tetrasubstituted imidazole derivatives in the presence of  $\{[2,6\text{-DMPyH}]\text{C}(\text{NO}_2)_3\}$  as a nanostructure MS

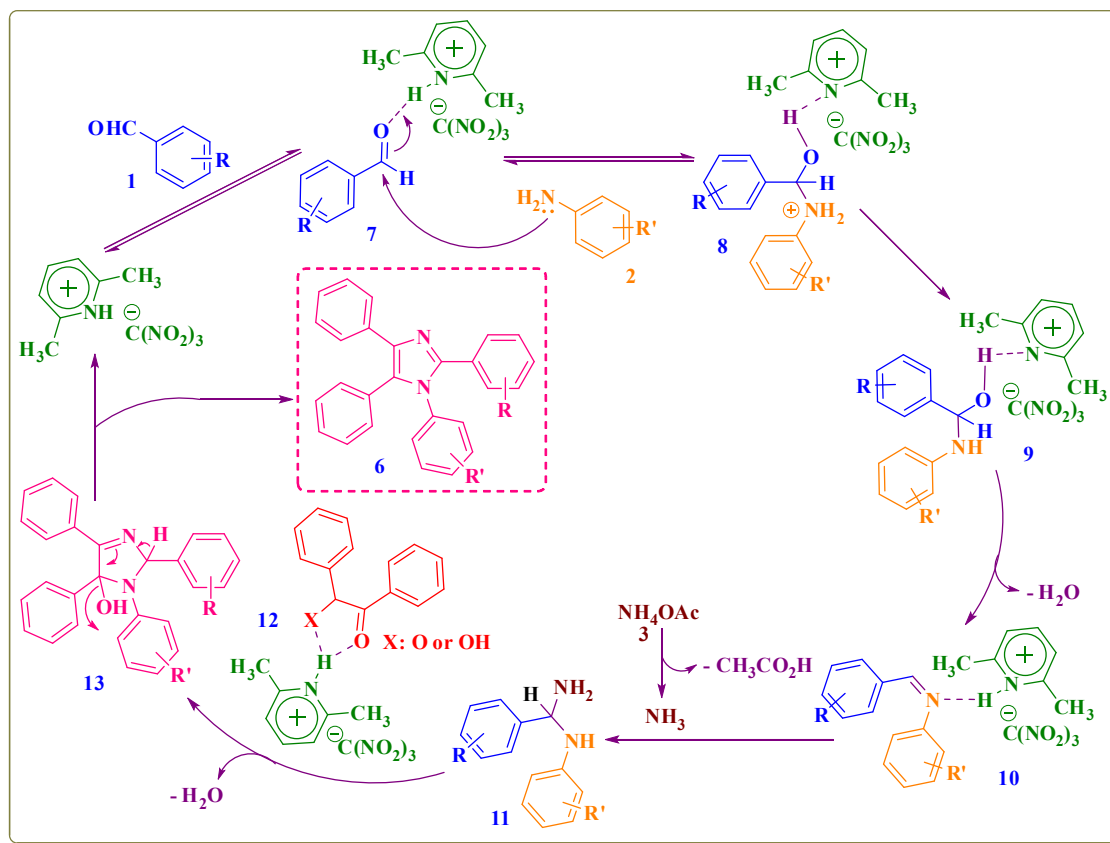

**Fig. S6.** Reusability of nanostructure MS catalyst in 6 minutes (using benzil) and 8 minutes (using benzoin)

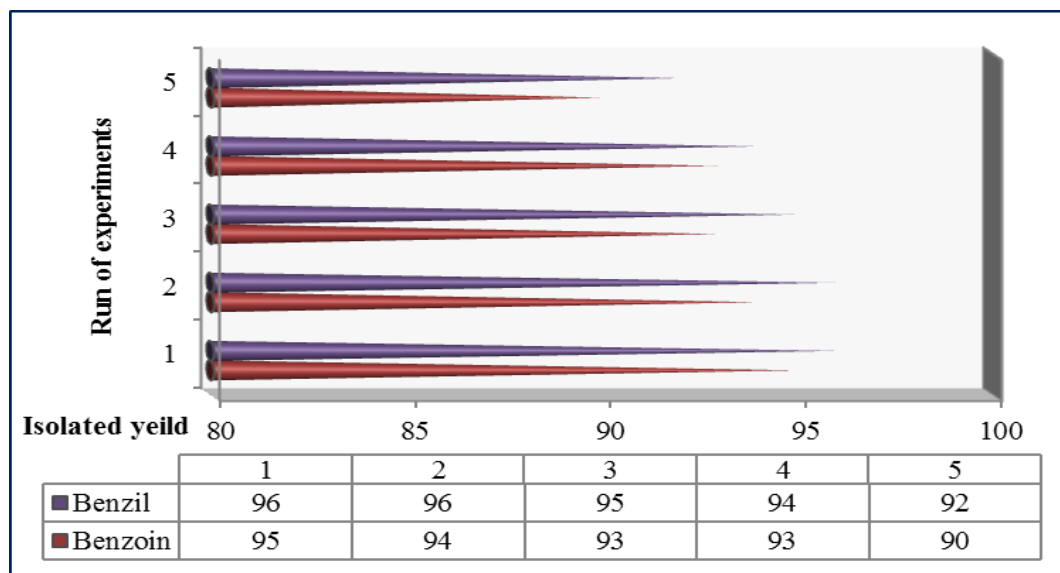



**Fig. S7.** The IR spectrum of 2,6-dimethylpyridinium trinitromethanide {[2,6-DMPyH]C(NO<sub>2</sub>)<sub>3</sub>} as a novel nano molten salt catalyst after recycling

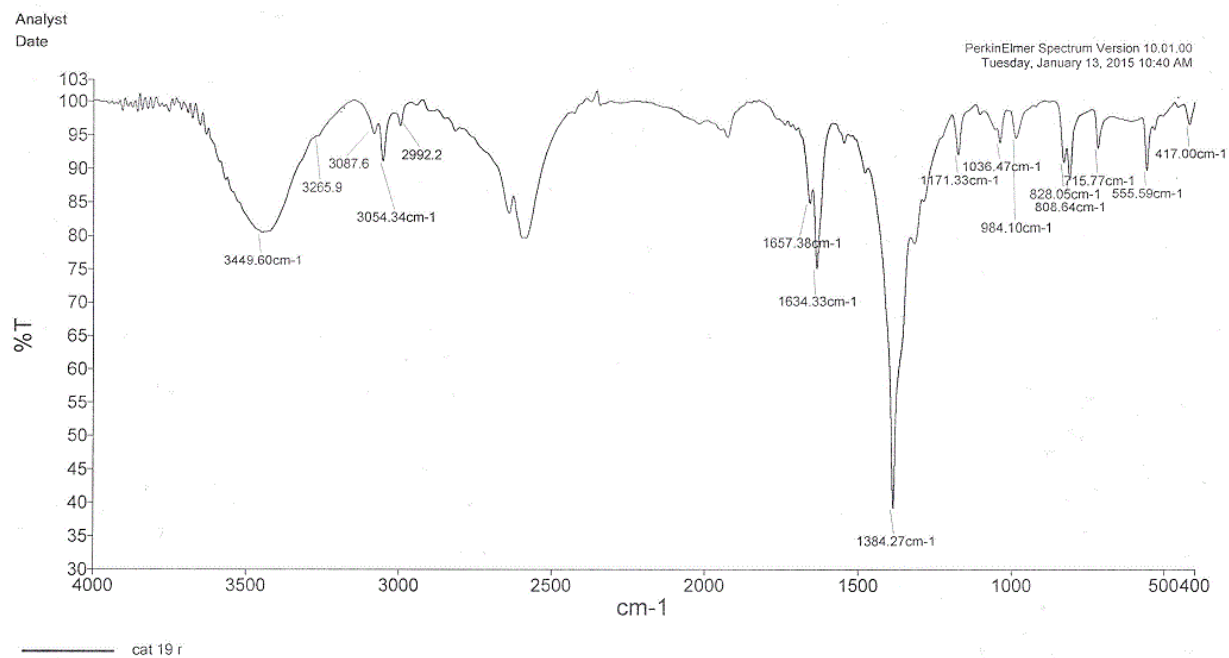

**Fig. S8.** The  $^1\text{H}$  NMR spectrum of 2,6-dimethylpyridinium trinitromethanide  $\{[2,6\text{-DMPyH}]\text{C}(\text{NO}_2)_3\}$  as a novel nano molten salt catalyst after recycling

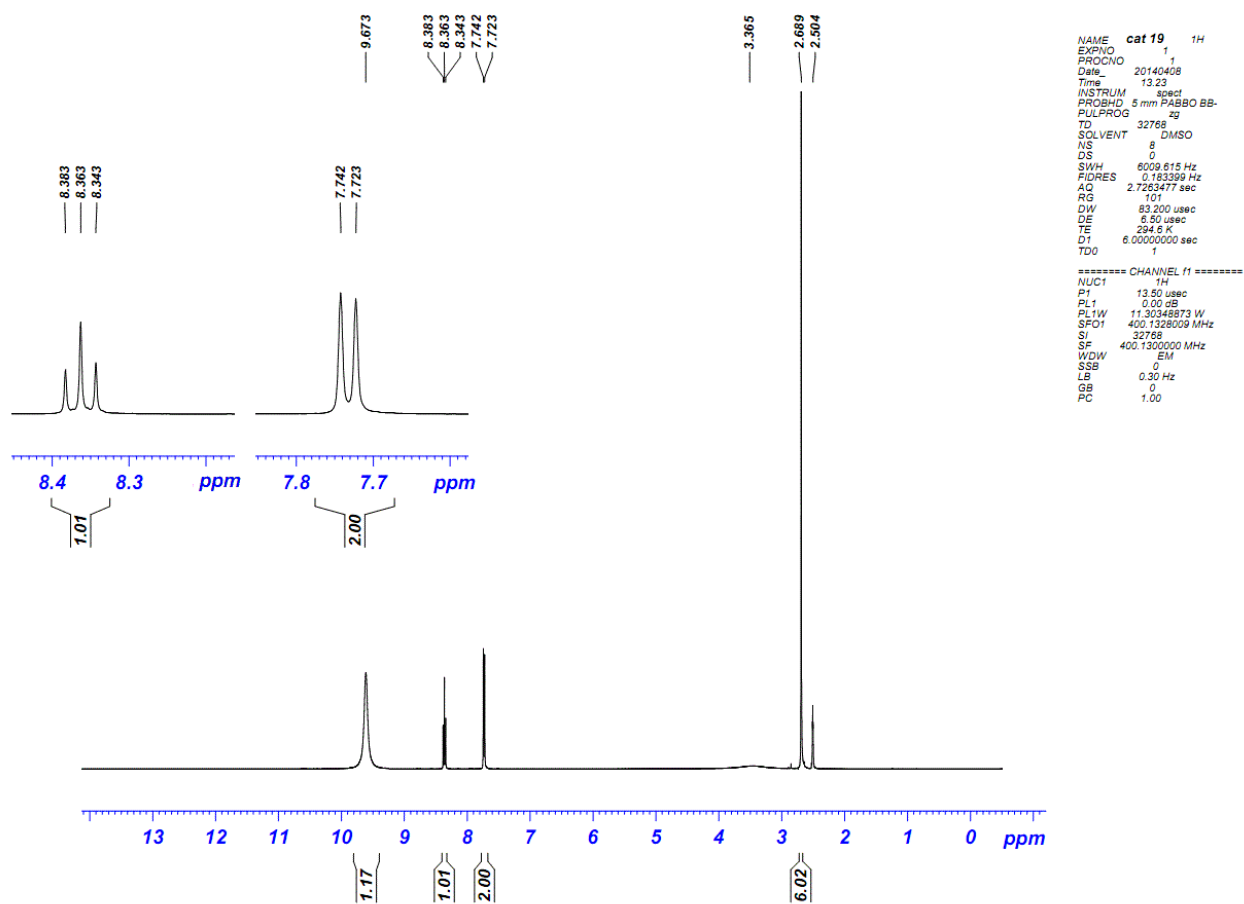

**Fig. S9.** The  $^{13}\text{C}$  NMR spectrum of 2,6-dimethylpyridinium trinitromethanide  $\{[2,6\text{-DMPyH}]\text{C}(\text{NO}_2)_3\}$  as a novel nano molten salt catalyst after recycling

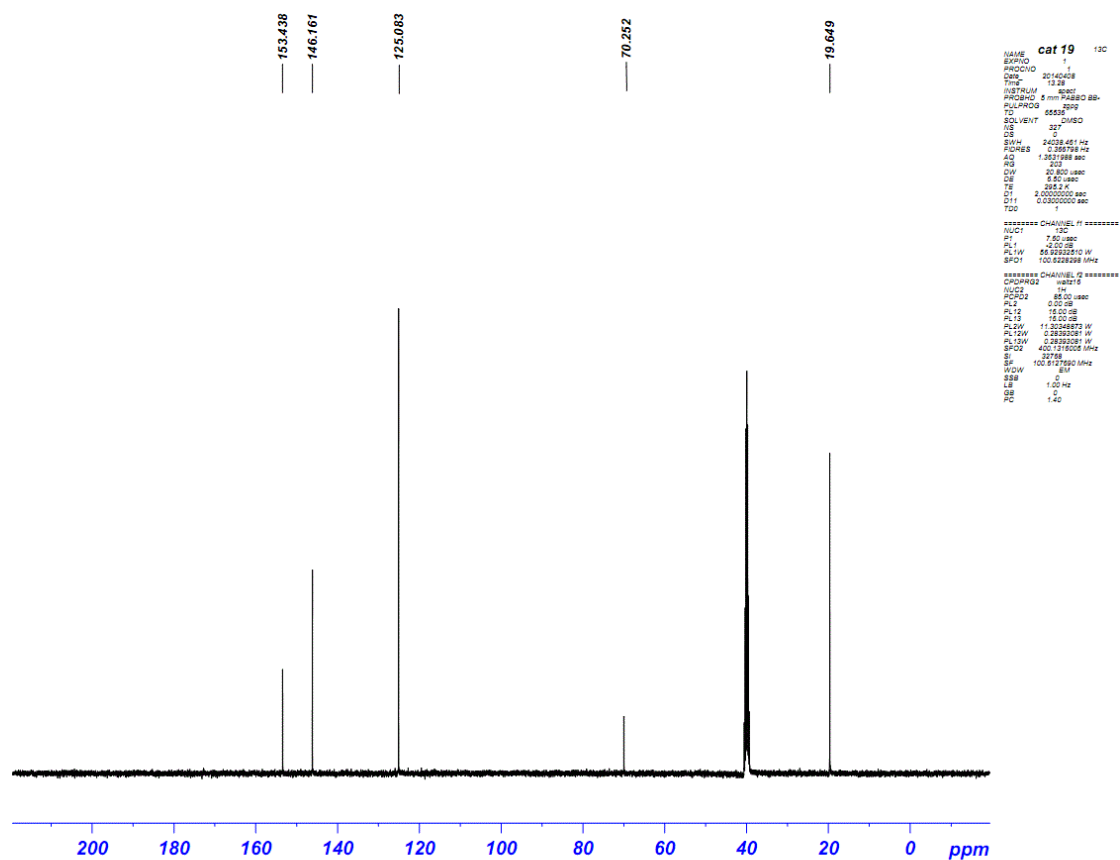

**Fig. S10.** The scanning electron microscopy (SEM) (a and b) and transmission electron microscopy (TEM) (c and d) of 2,6-dimethylpyridinium trinitromethanide  $\{[2,6\text{-DMPyH}]\text{C}(\text{NO}_2)_3\}$  as a novel nano molten salt catalyst after recycling

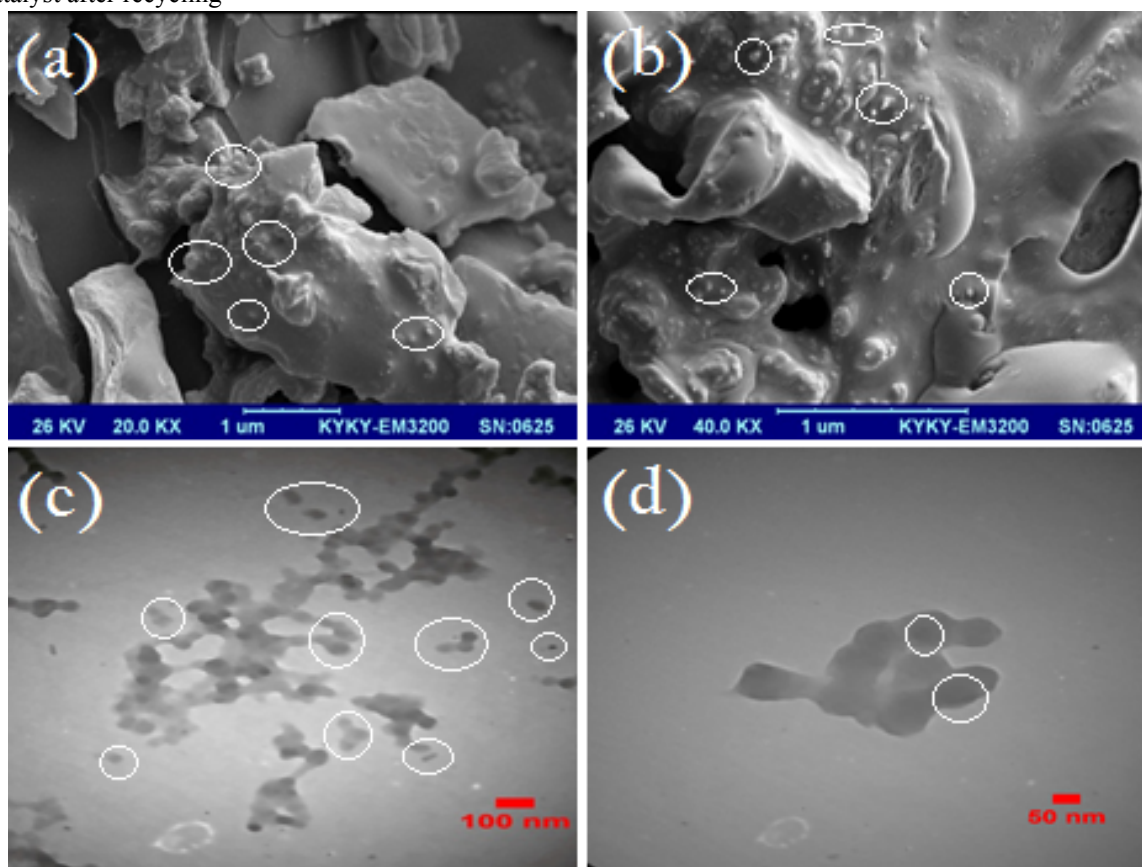

**Fig. S11.** The IR spectrum of 2-(4-nitrophenyl)-4,5-diphenyl-1-*p*-tolyl-1*H*-imidazole (Table 4, entry 1)

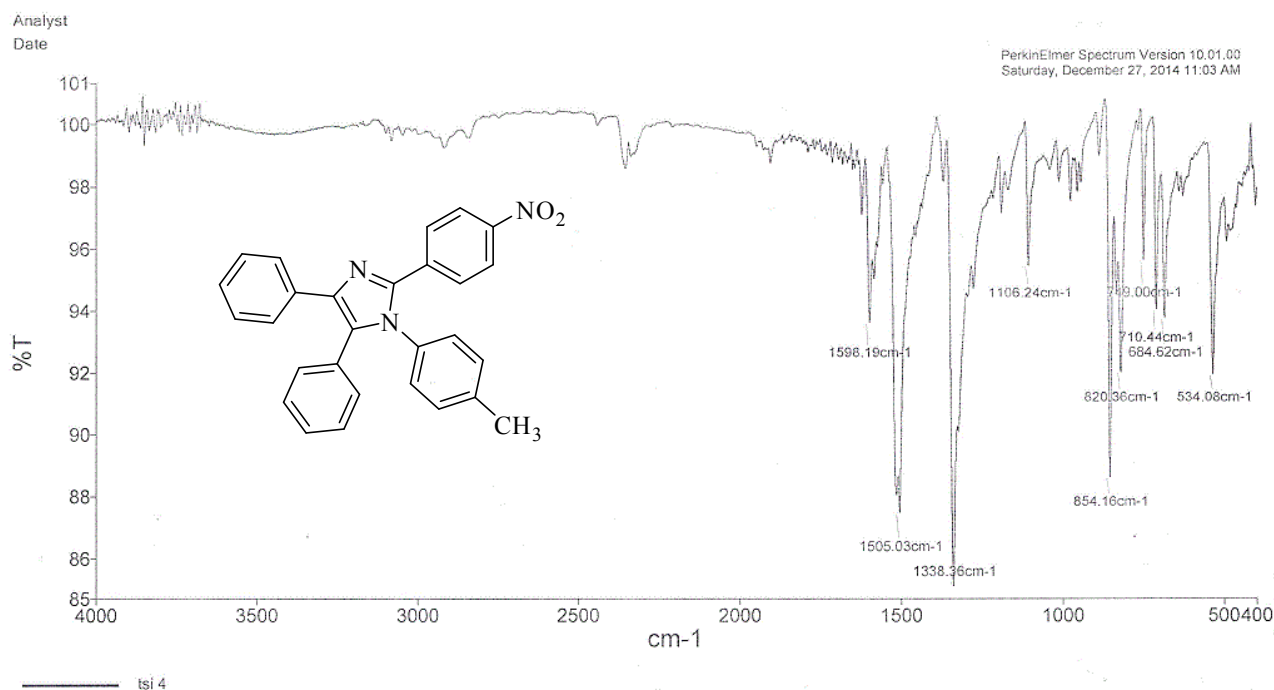

Fig. S12. The <sup>1</sup>H NMR spectrum of 2-(4-nitrophenyl)-4,5-diphenyl-1-p-tolyl-1H-imidazole (Table 4, entry 1)

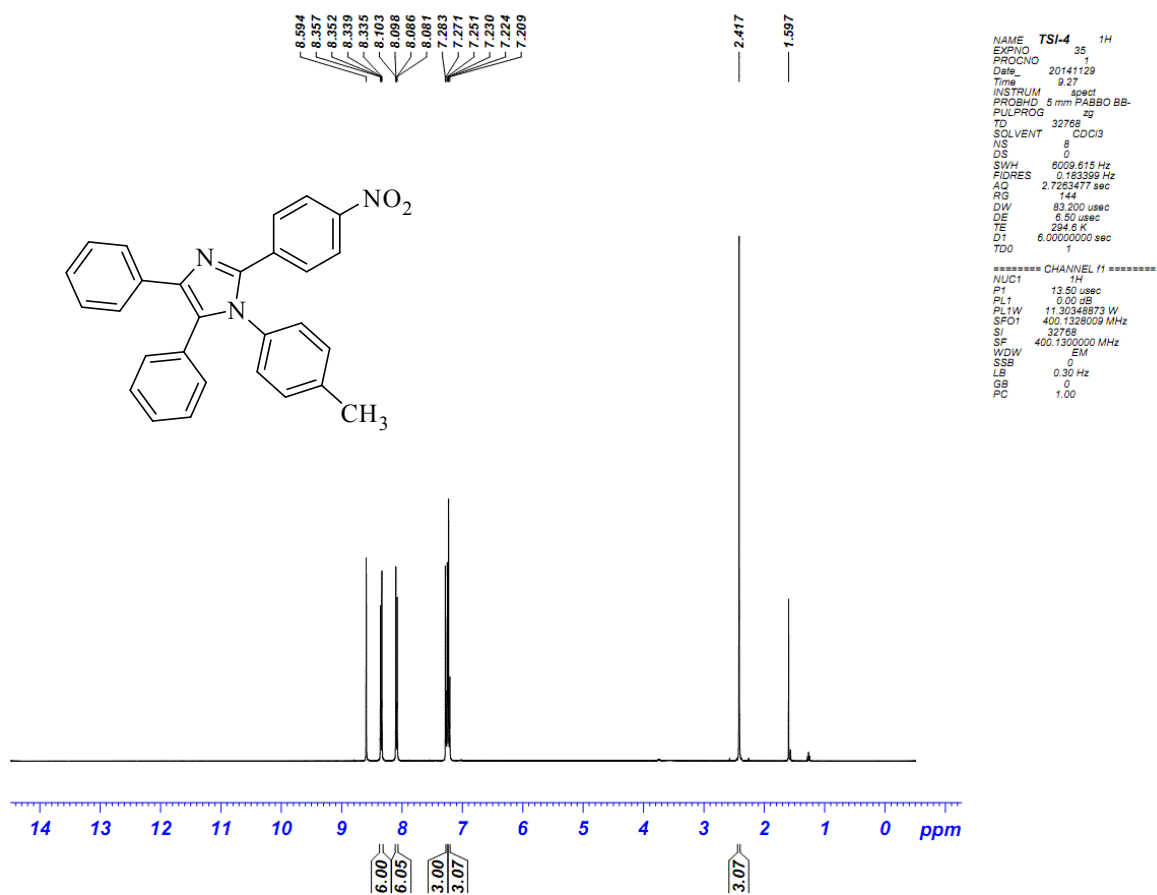

Fig. S13. The <sup>1</sup>H NMR spectrum of 2-(4-nitrophenyl)-4,5-diphenyl-1-*p*-tolyl-1*H*-imidazole (Table 4, entry 1)

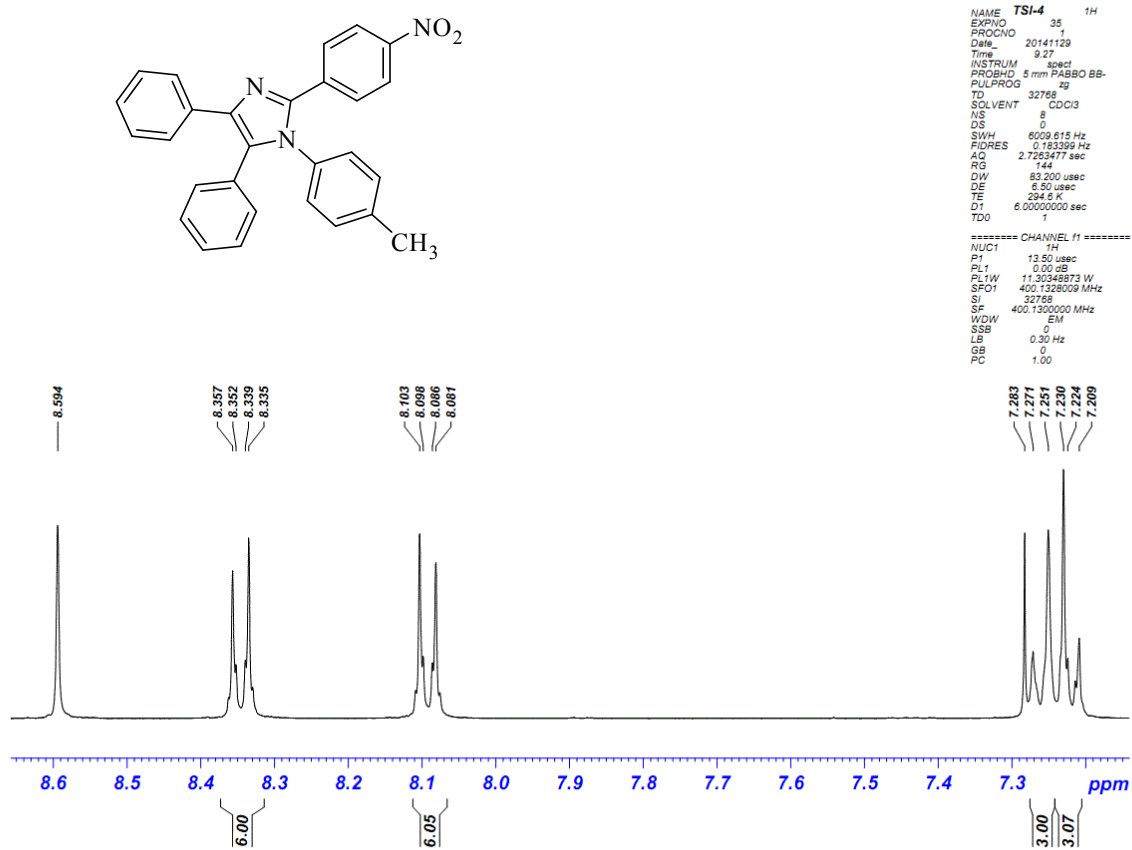

Fig. S14. The  $^{13}\text{C}$  NMR spectrum of 2-(4-nitrophenyl)-4,5-diphenyl-1-*p*-tolyl-1*H*-imidazole (Table 4, entry 1)

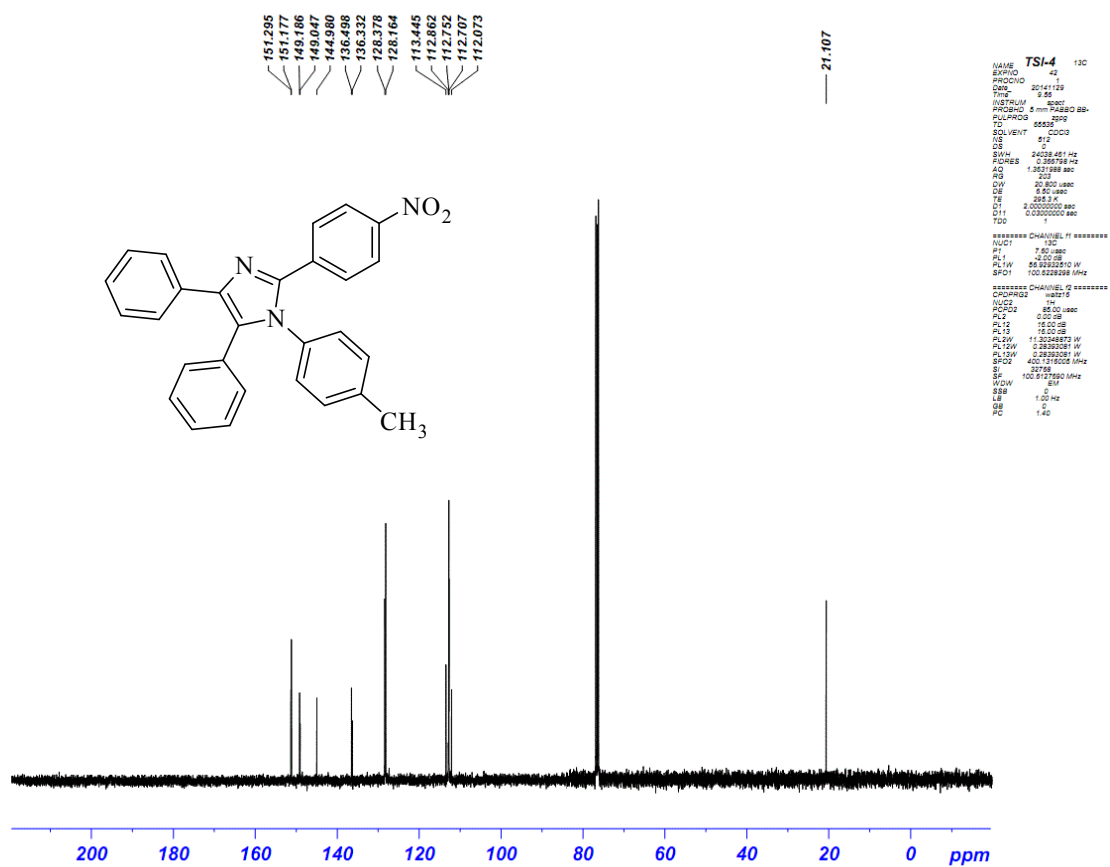

**Fig. S15.** The <sup>13</sup>C NMR spectrum of 2-(4-nitrophenyl)-4,5-diphenyl-1-*p*-tolyl-1*H*-imidazole (Table 4, entry 1)

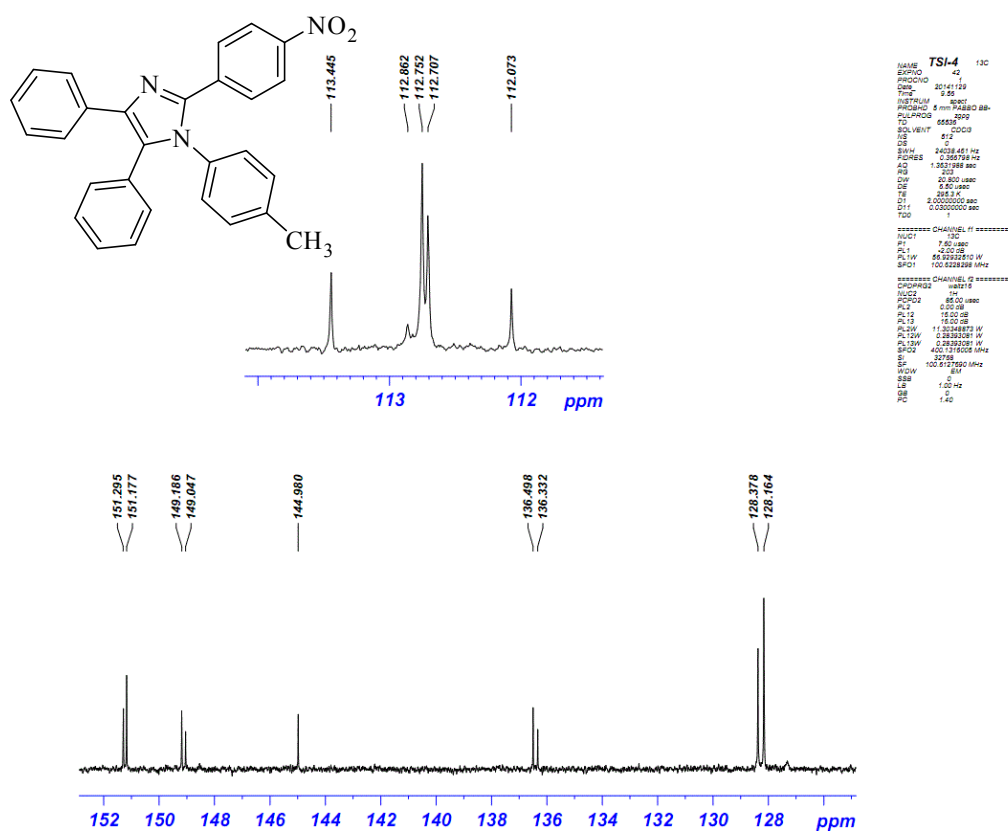

**Fig. S16.** The IR spectrum of 1-(4-chlorophenyl)-2-(4-nitrophenyl)-4,5-diphenyl-1*H*-imidazole (Table 4, entry 2)

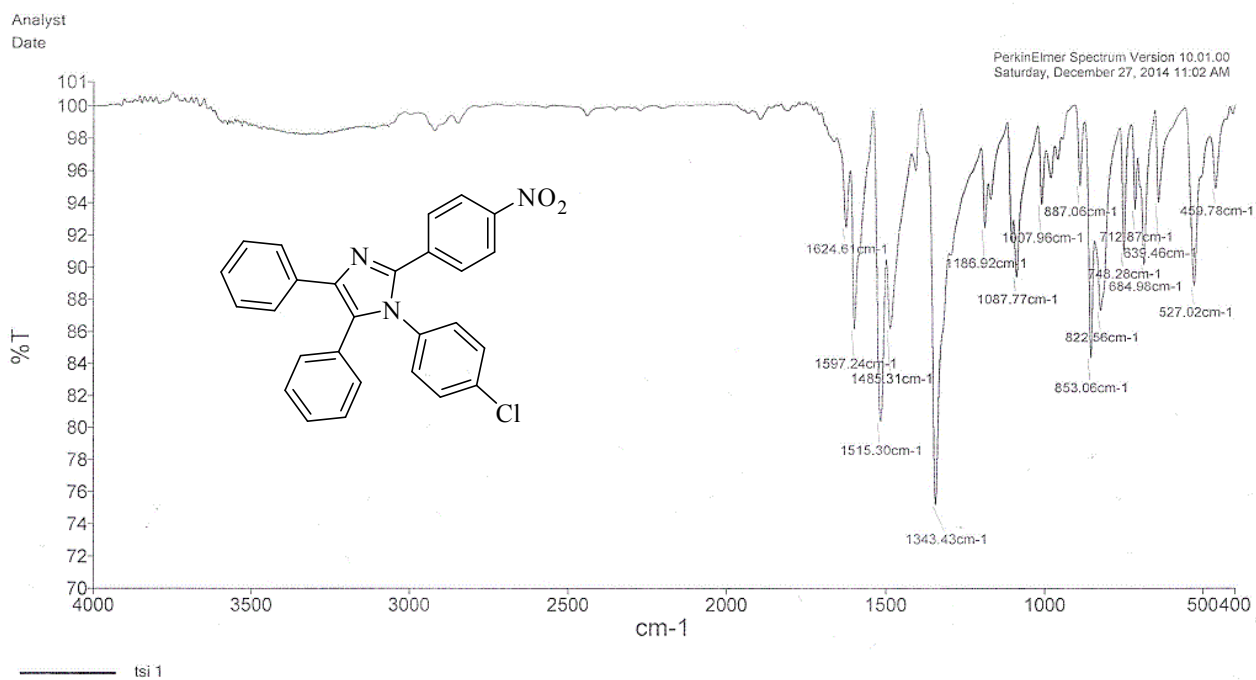



**Fig. S17.** The  $^1\text{H}$  NMR spectrum of 1-(4-chlorophenyl)-2-(4-nitrophenyl)-4,5-diphenyl-1*H*-imidazole (Table 4, entry 2)

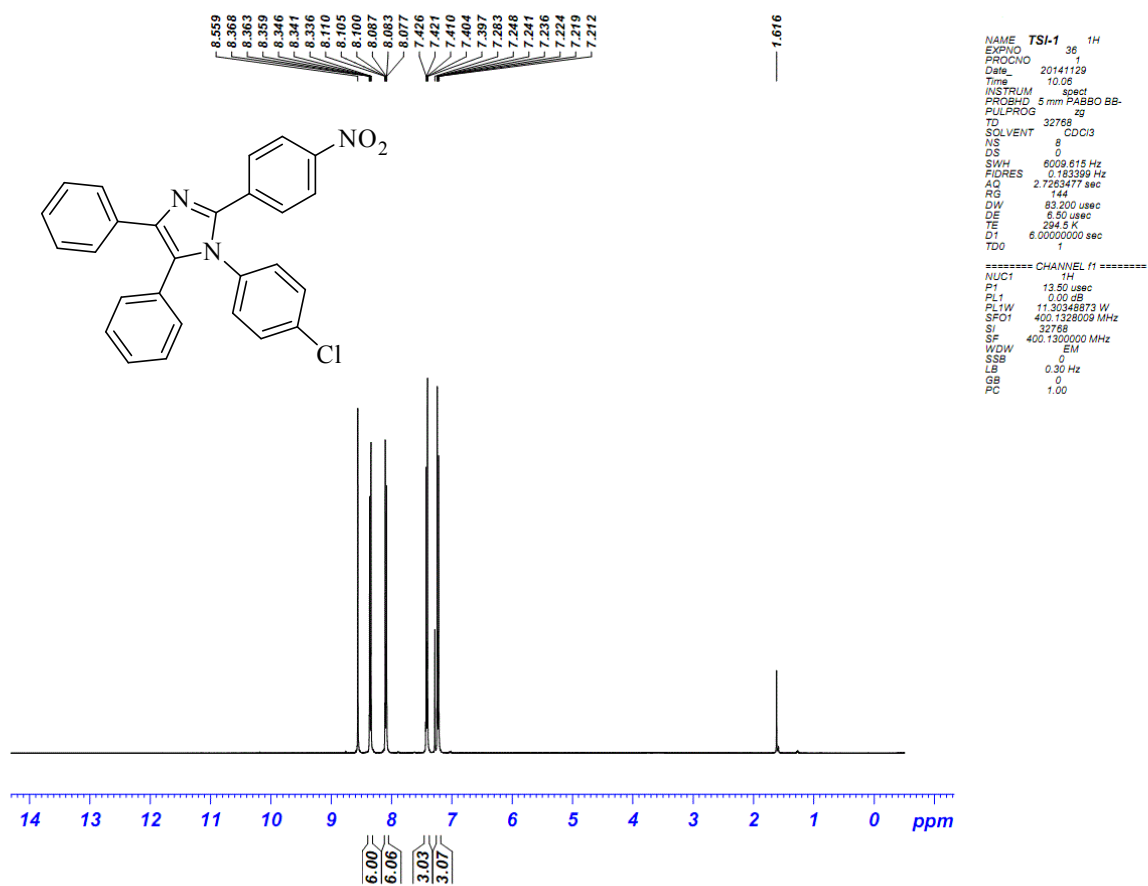

**Fig. S18.** The  $^1\text{H}$  NMR spectrum of 1-(4-chlorophenyl)-2-(4-nitrophenyl)-4,5-diphenyl-1*H*-imidazole (Table 4, entry 2)

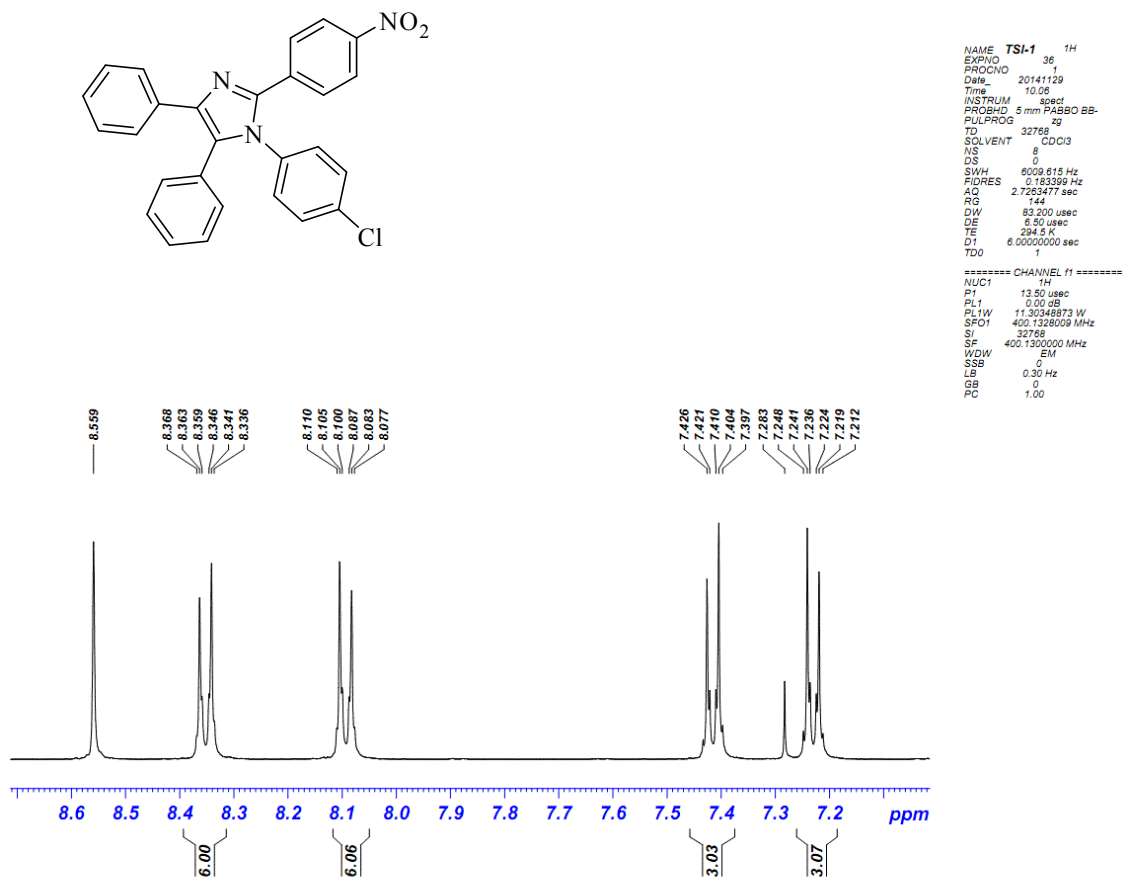

**Fig. S19.** The <sup>13</sup>C NMR spectrum of 1-(4-chlorophenyl)-2-(4-nitrophenyl)-4,5-diphenyl-1H-imidazole (Table 4, entry 2)

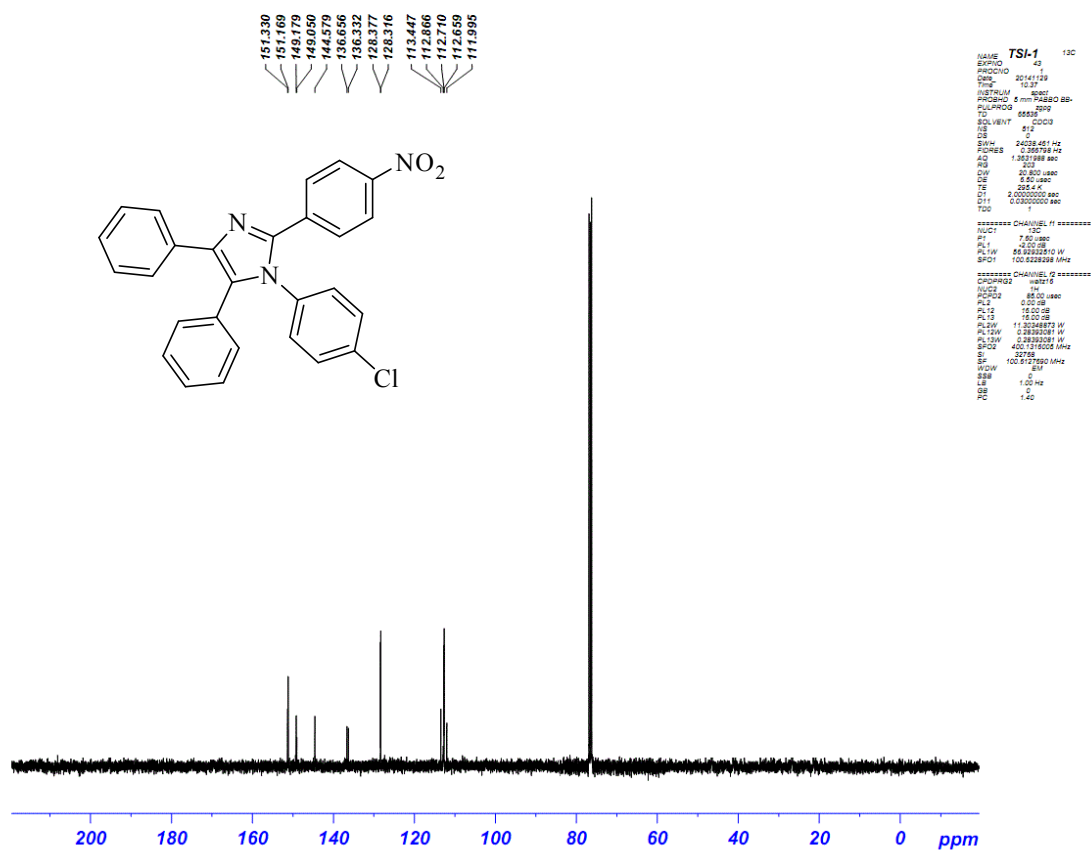

**Fig. S20.** The <sup>13</sup>C NMR spectrum of 21-(4-chlorophenyl)-2-(4-nitrophenyl)-4,5-diphenyl-1*H*-imidazole (Table 4, entry 2)

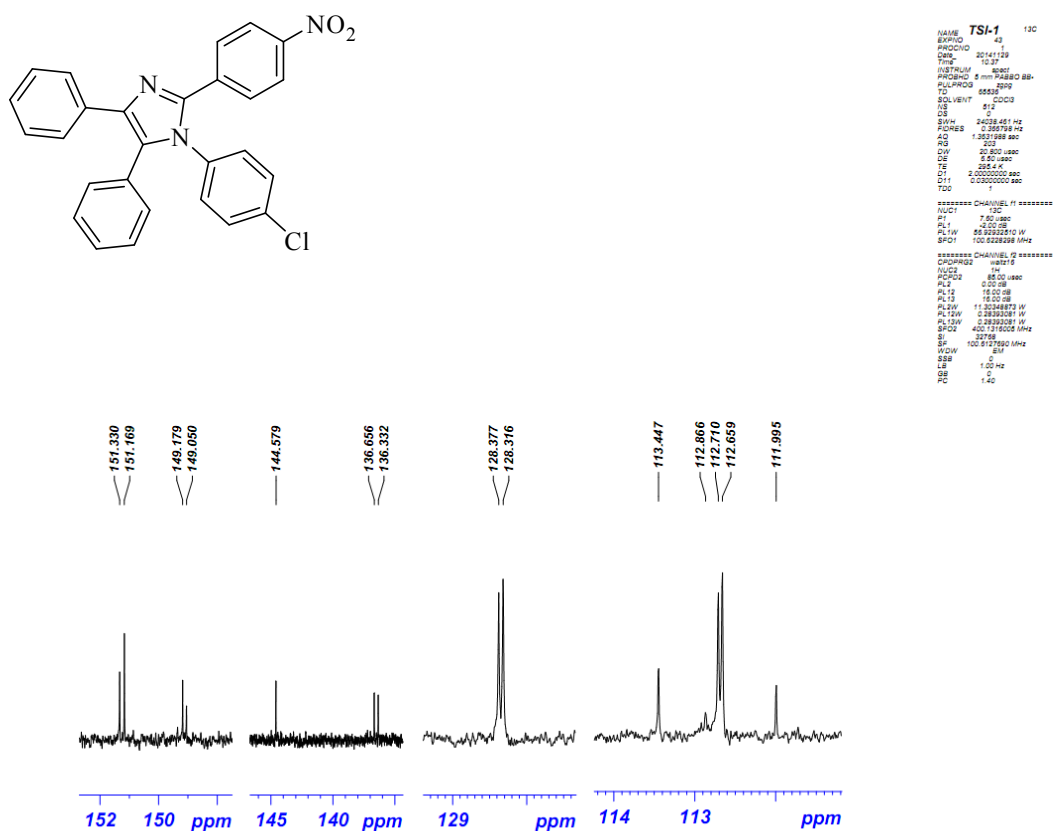

**Fig. S21.** The mass spectrum of 1-(4-chlorophenyl)-2-(4-nitrophenyl)-4,5-diphenyl-1*H*-imidazole (Table 4, entry 2)

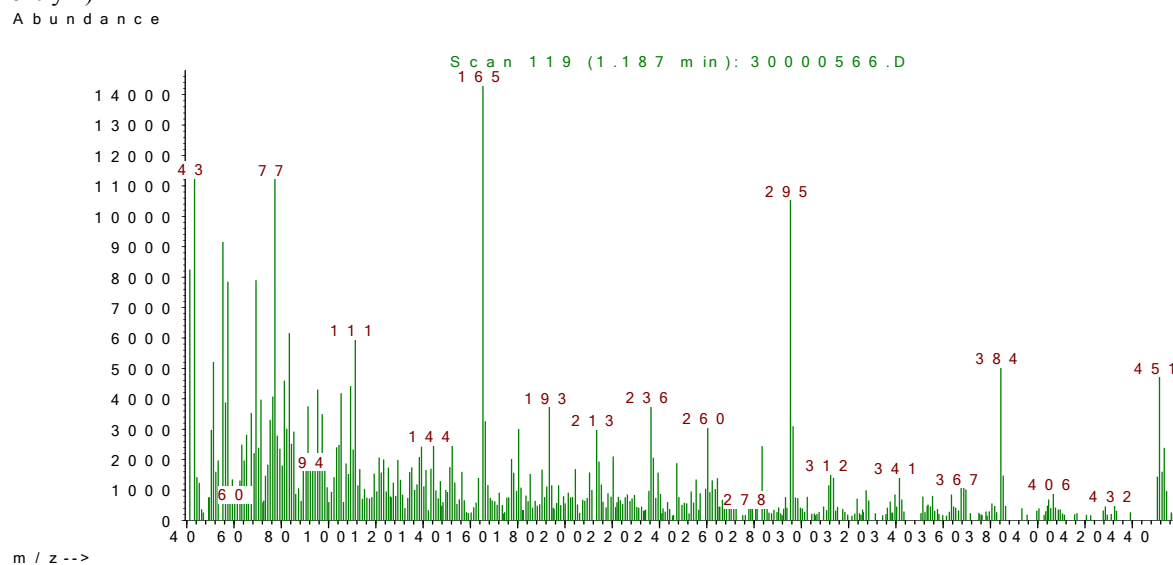

**Fig. S22.** The IR spectrum of 1-(4-bromophenyl)-2-(4-nitrophenyl)-4,5-diphenyl-1*H*-imidazole (Table 4, entry 3)

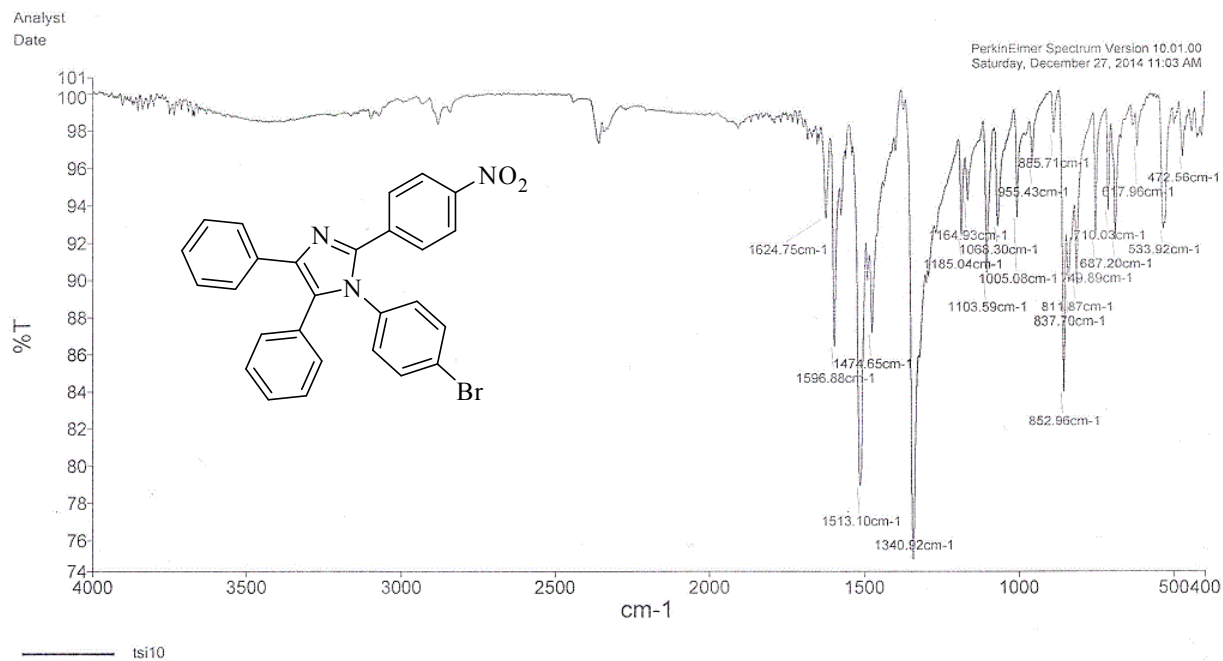

**Fig. S23.** The  $^1\text{H}$  NMR spectrum of 1-(4-bromophenyl)-2-(4-nitrophenyl)-4,5-diphenyl-1*H*-imidazole (Table 4, entry 3)

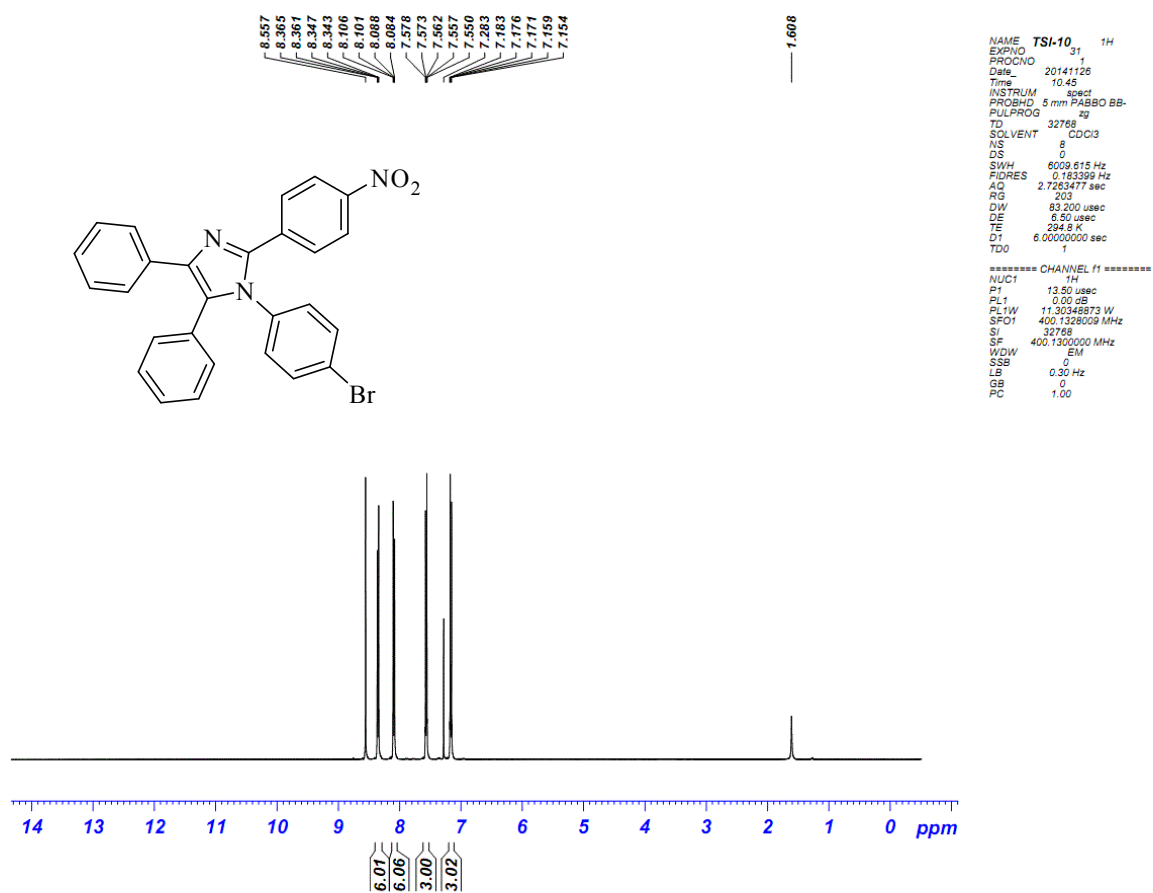

**Fig. S24.** The  $^1\text{H}$  NMR spectrum of 1-(4-bromophenyl)-2-(4-nitrophenyl)-4,5-diphenyl-1*H*-imidazole (Table 4, entry 3)

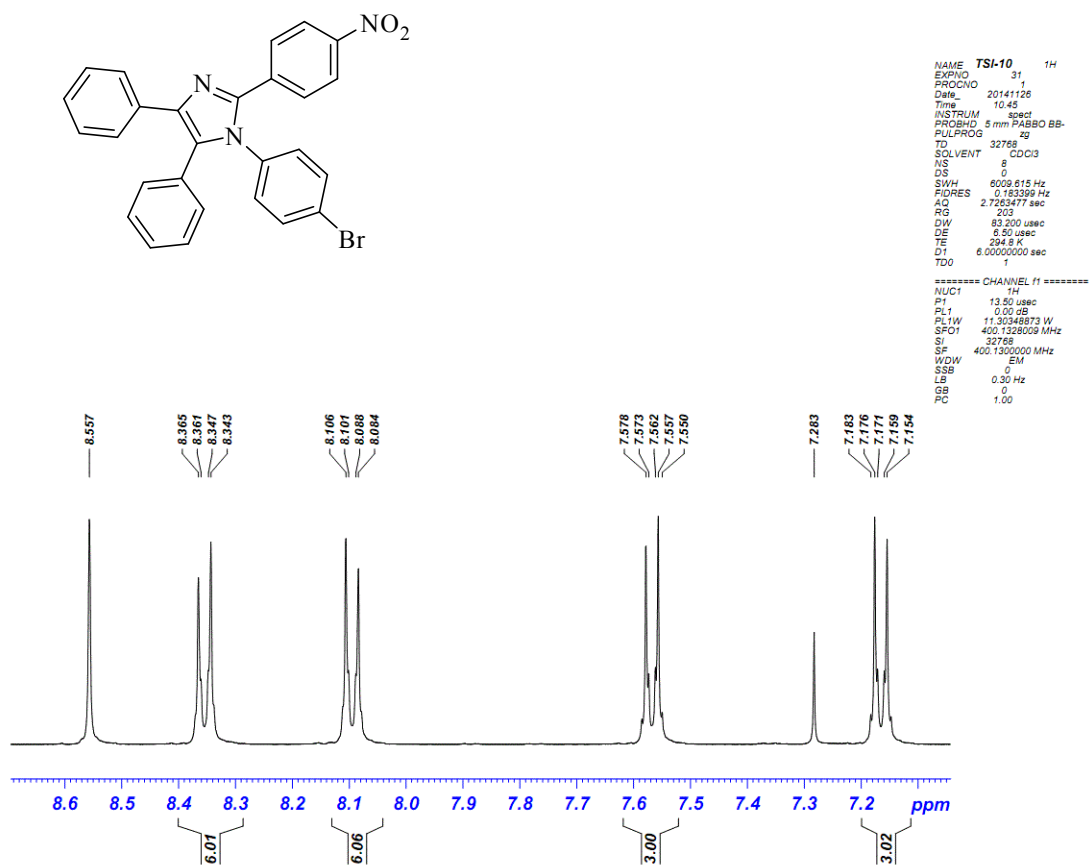

**Fig. S25.** The <sup>13</sup>C NMR spectrum of 1-(4-bromophenyl)-2-(4-nitrophenyl)-4,5-diphenyl-1*H*-imidazole (Table 4, entry 3)

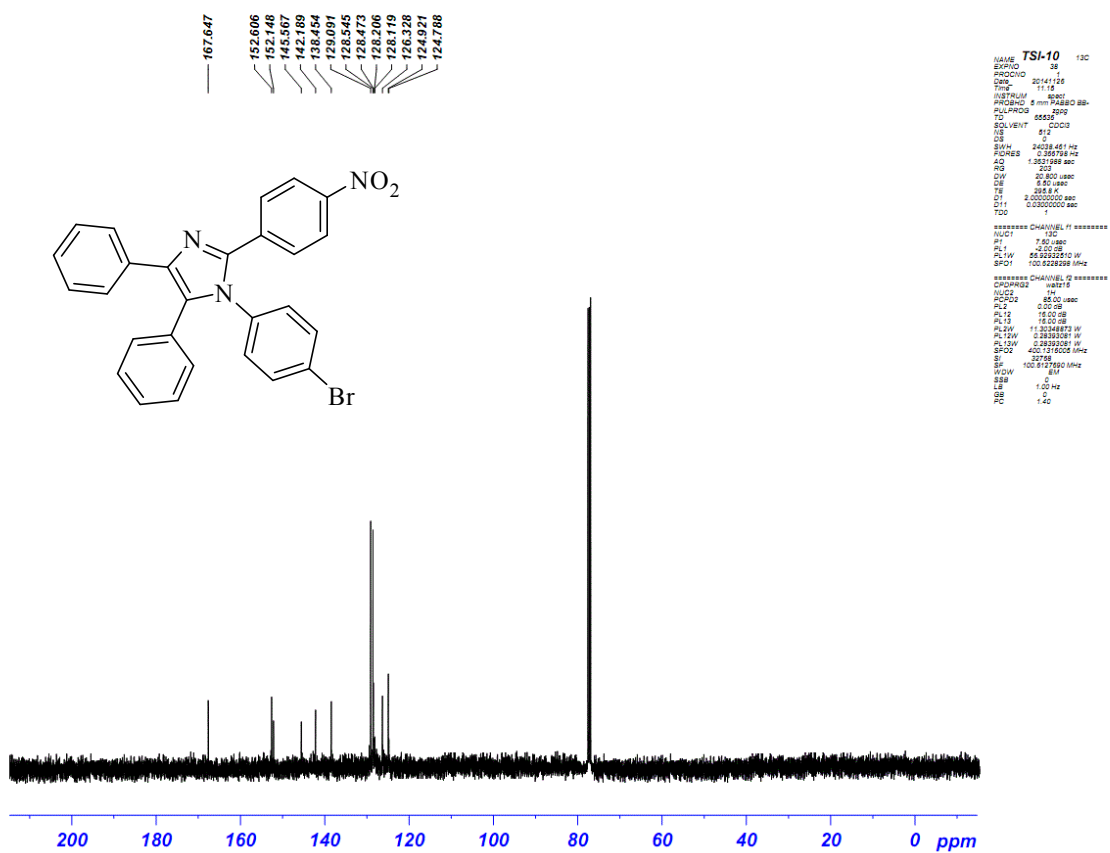



**Fig. S26.** The  $^{13}\text{C}$  NMR spectrum of 1-(4-bromophenyl)-2-(4-nitrophenyl)-4,5-diphenyl-1*H*-imidazole (Table 4, entry 3)

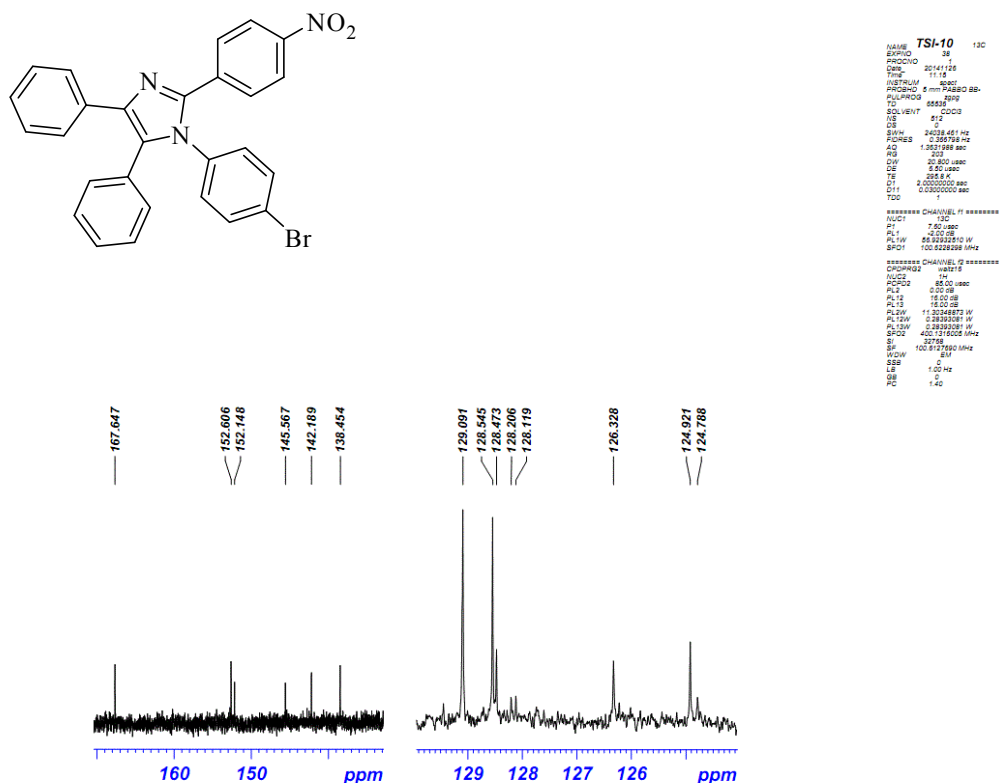

**Fig. S27.** The mass spectrum of 1-(4-bromophenyl)-2-(4-nitrophenyl)-4,5-diphenyl-1*H*-imidazole (Table 4, entry 3)

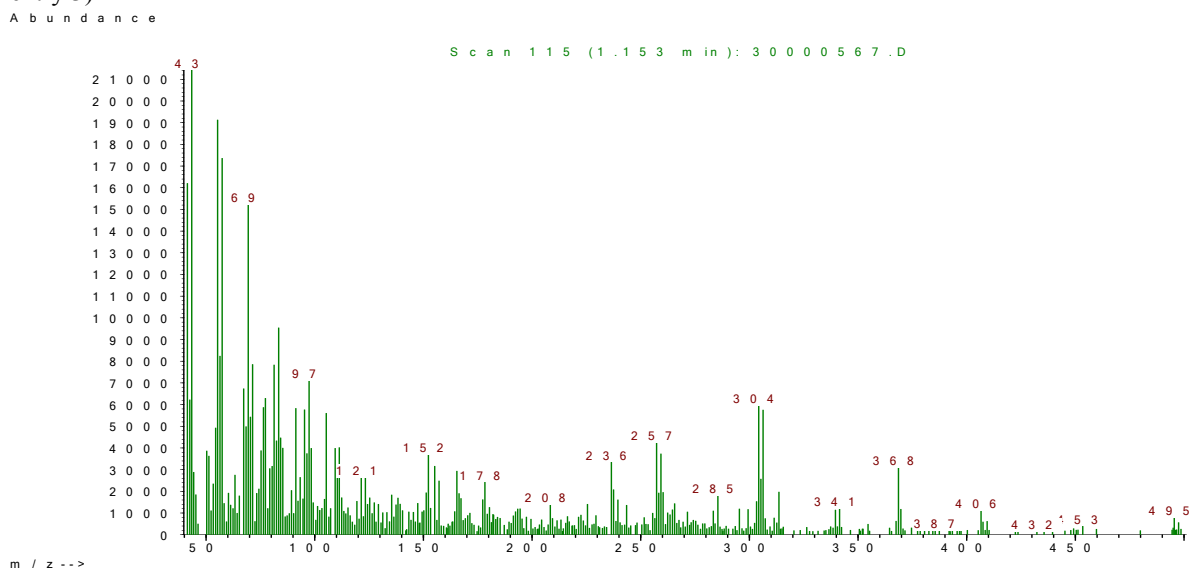

**Fig. S28.** The IR spectrum of 2-(4-chlorophenyl)-4,5-diphenyl-1-*p*-tolyl-1*H*-imidazole (Table 4, entry 4)

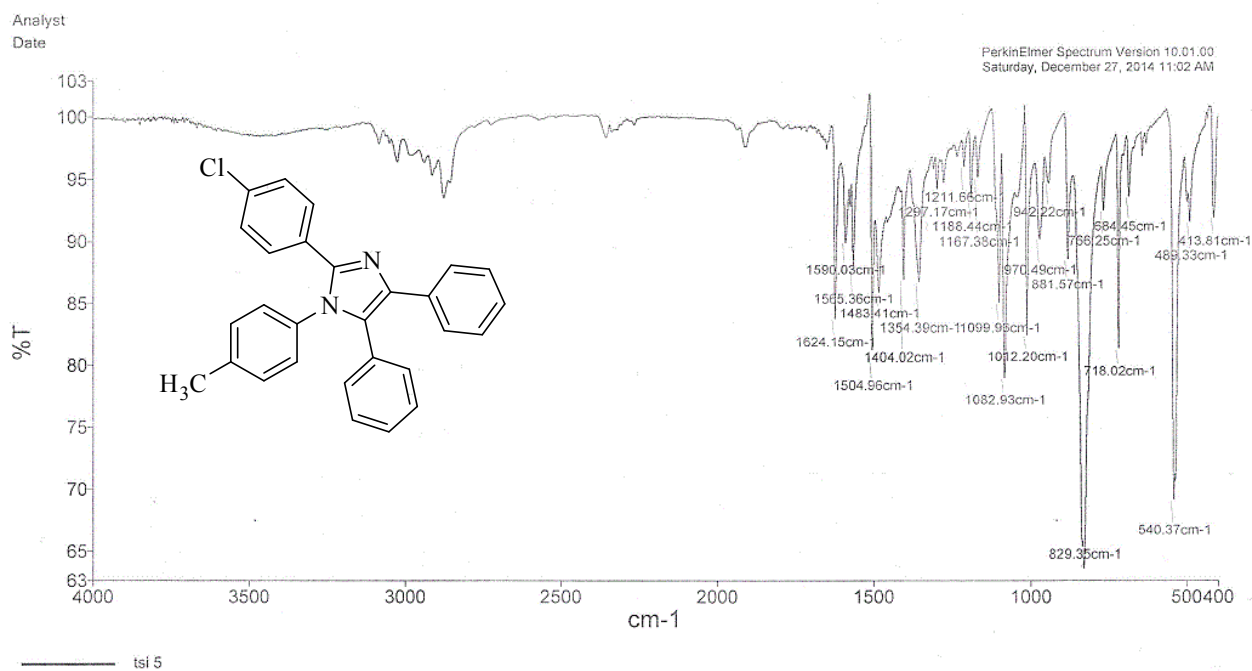

Fig. S29. The <sup>1</sup>H NMR spectrum of 2-(4-chlorophenyl)-4,5-diphenyl-1-*p*-tolyl-1*H*-imidazole (Table 4, entry 4)

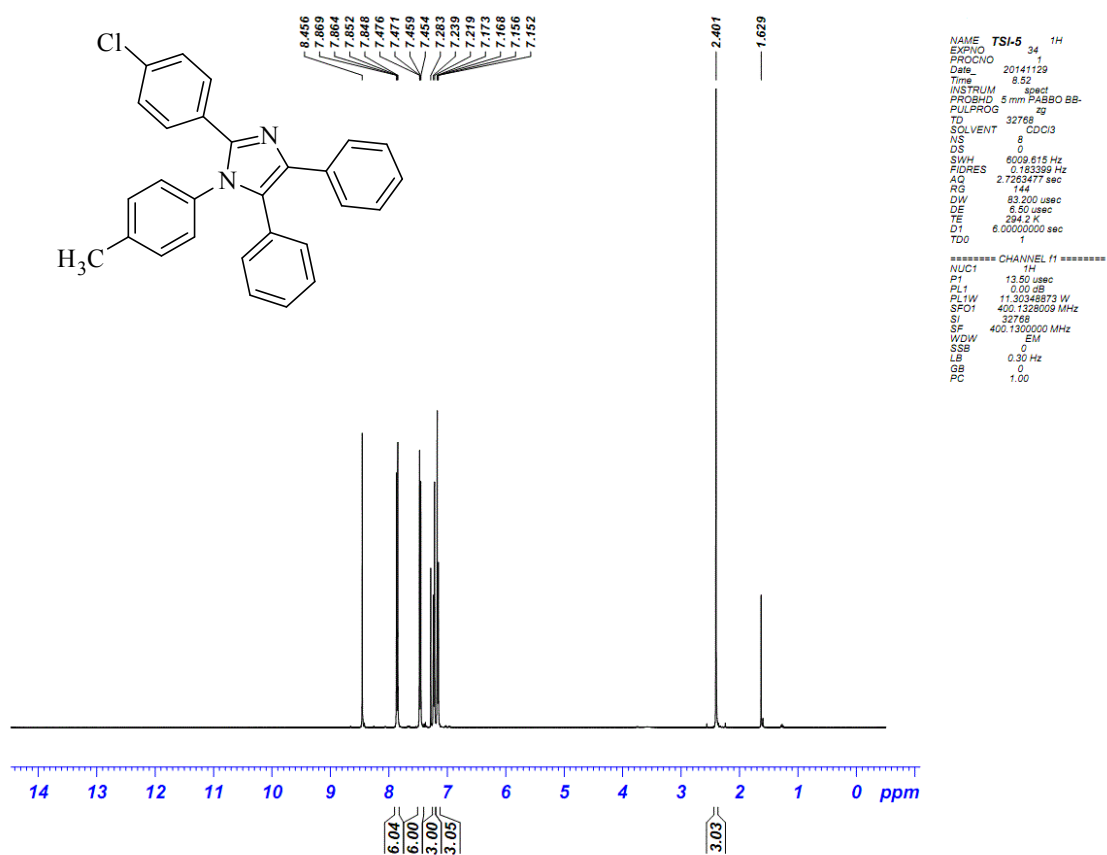

Fig. S30. The <sup>1</sup>H NMR spectrum of 2-(4-chlorophenyl)-4,5-diphenyl-1-*p*-tolyl-1*H*-imidazole (Table 4, entry 4)

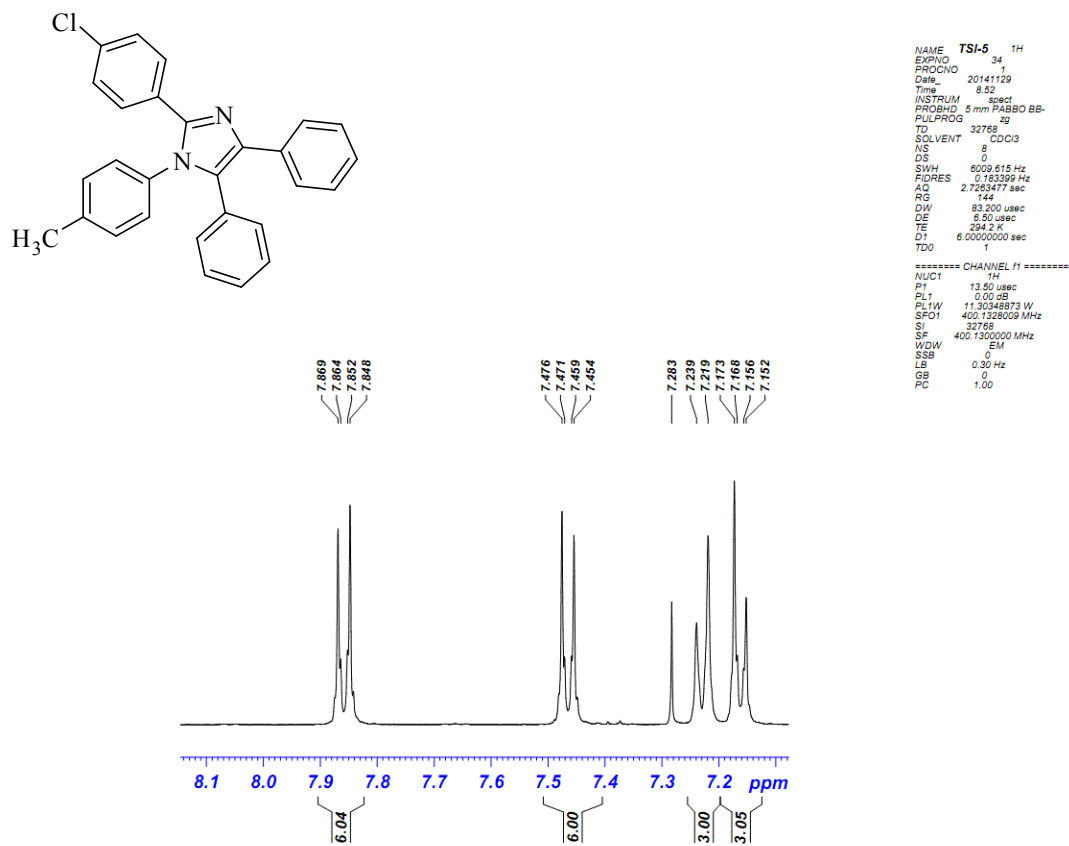

Fig. S31. The  $^{13}\text{C}$  NMR spectrum of 2-(4-chlorophenyl)-4,5-diphenyl-1-*p*-tolyl-1*H*-imidazole (Table 4, entry 4)

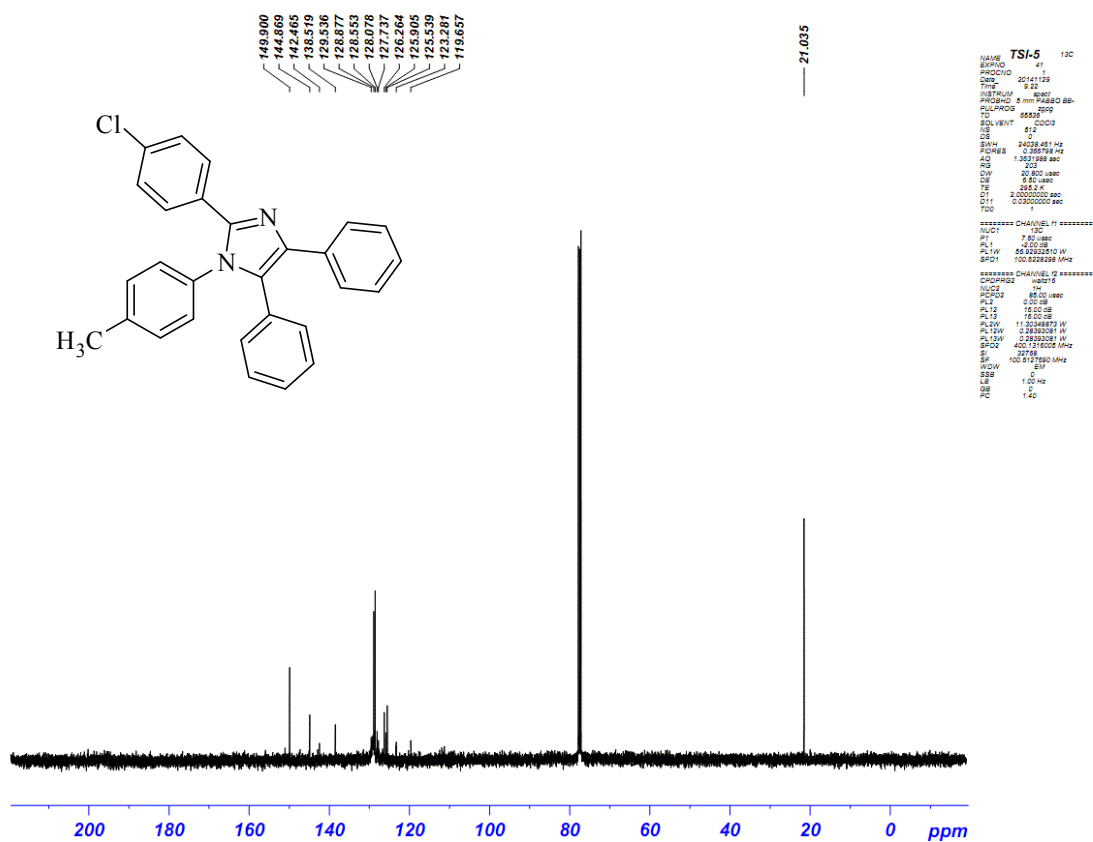

Fig. S32. The  $^{13}\text{C}$  NMR spectrum of 2-(4-chlorophenyl)-4,5-diphenyl-1-*p*-tolyl-1*H*-imidazole (Table 4, entry 4)

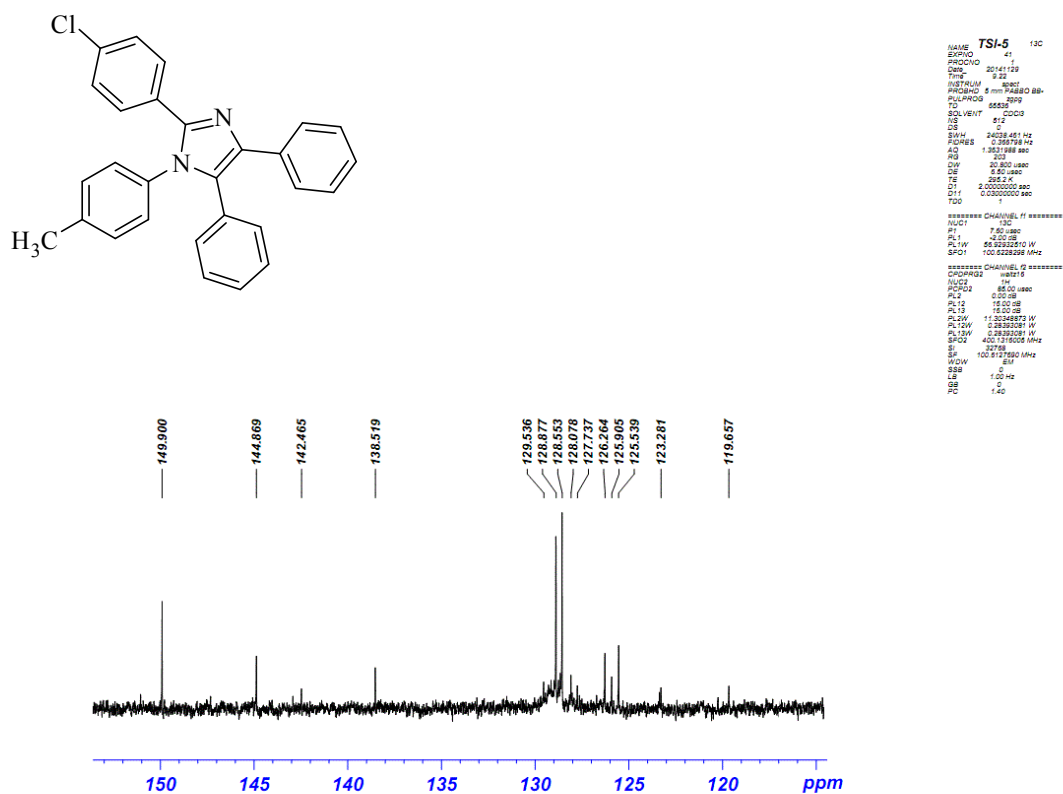

Fig. S33. The IR spectrum of 1,2-bis(4-chlorophenyl)-4,5-diphenyl-1*H*-imidazole (Table 4, entry 5)

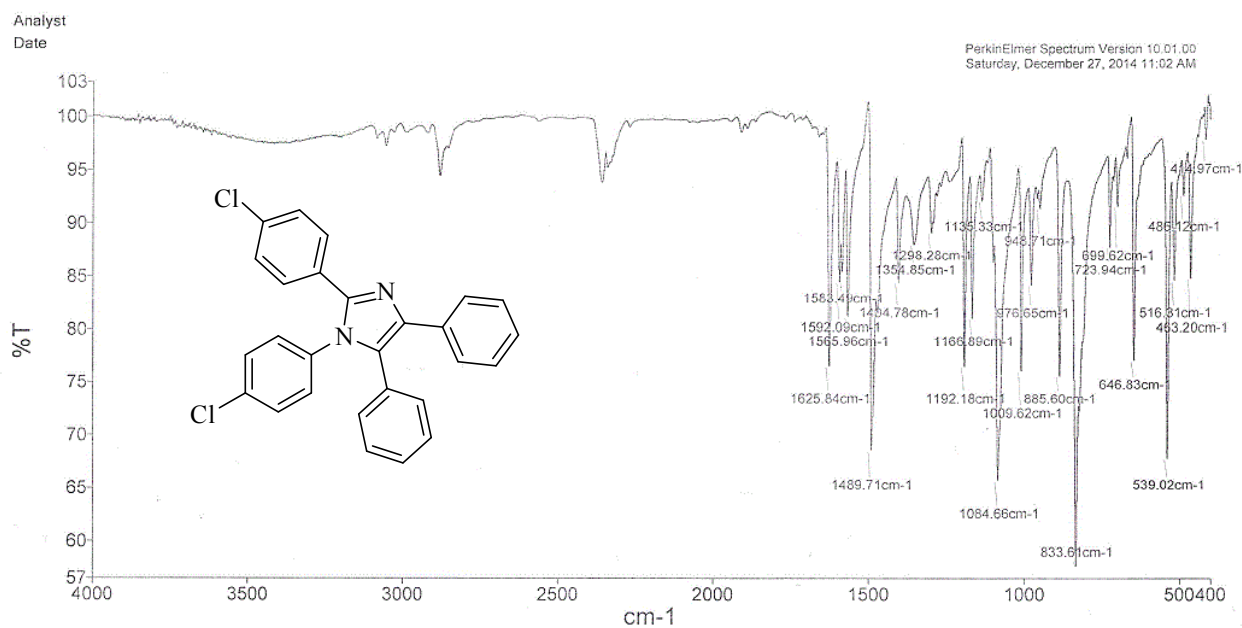

Fig. S34. The <sup>1</sup>H NMR spectrum of 1,2-bis(4-chlorophenyl)-4,5-diphenyl-1*H*-imidazole (Table 4, entry 5)

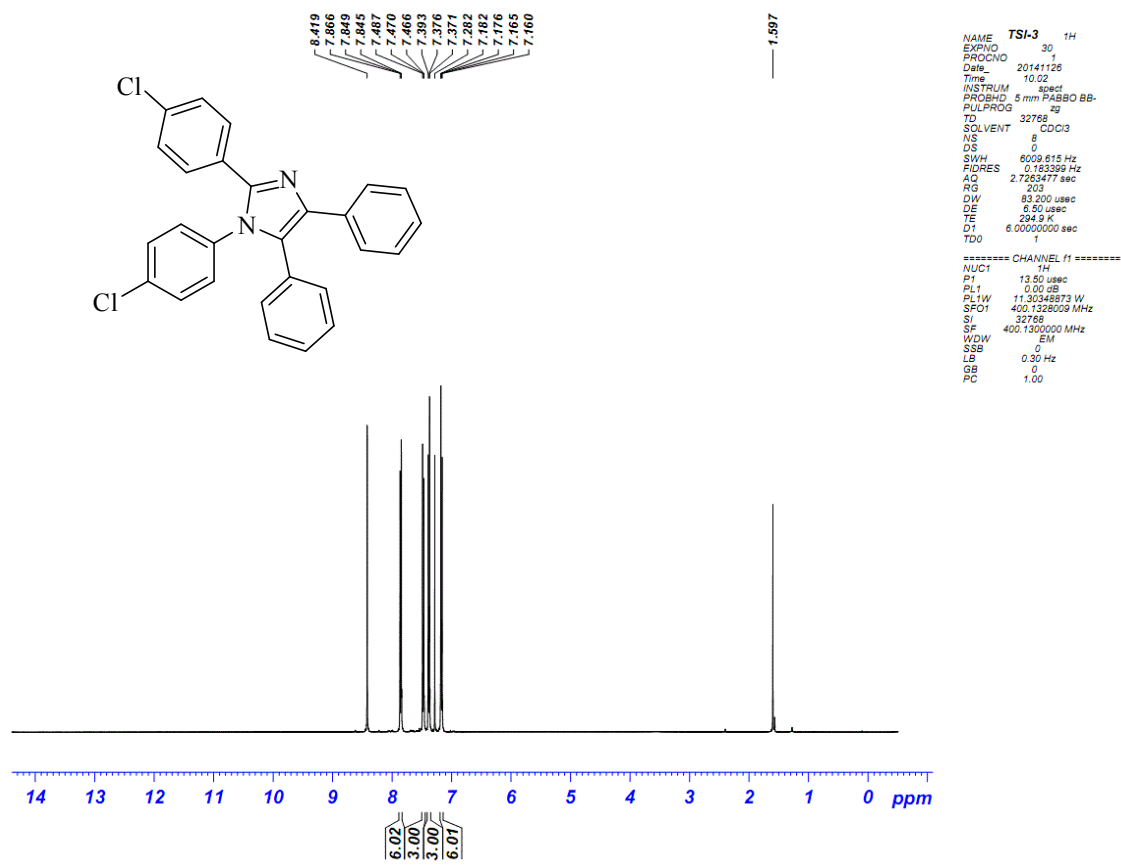

Fig. S35. The <sup>1</sup>H NMR spectrum of 1,2-bis(4-chlorophenyl)-4,5-diphenyl-1H-imidazole (Table 4, entry 5)

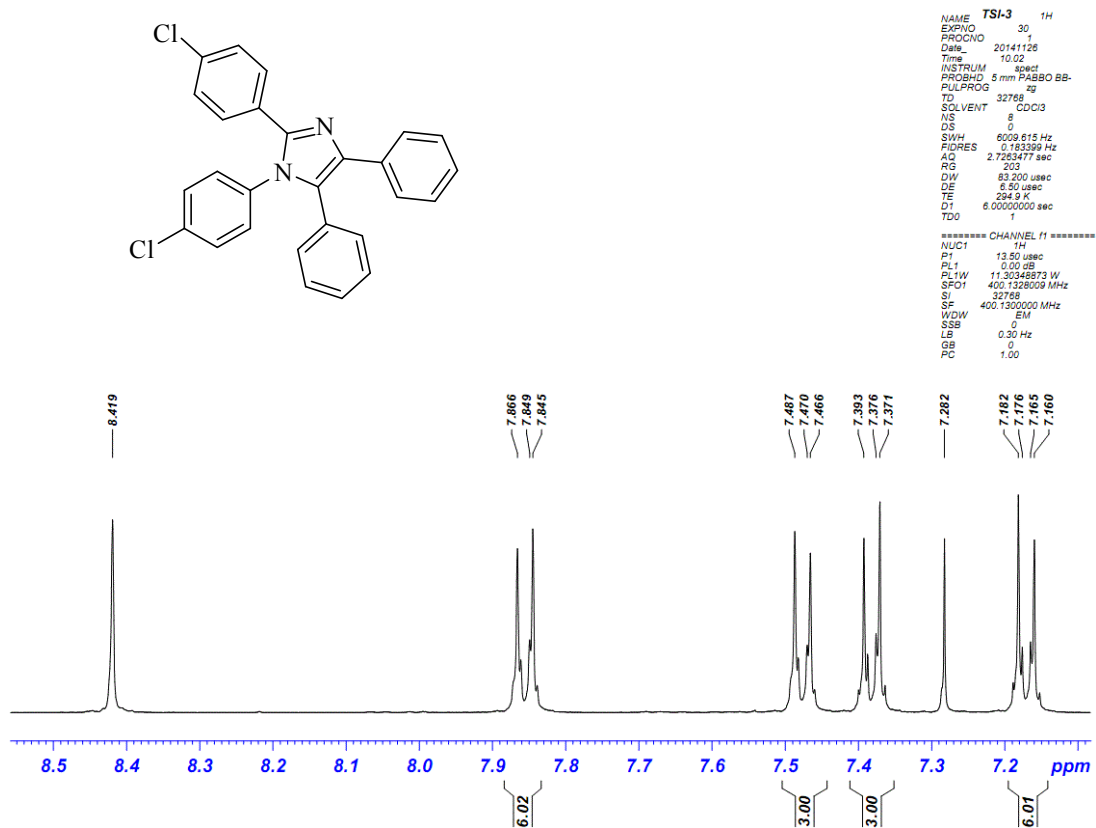



Fig. S36. The <sup>13</sup>C NMR spectrum of 1,2-bis(4-chlorophenyl)-4,5-diphenyl-1*H*-imidazole (Table 4, entry 5)

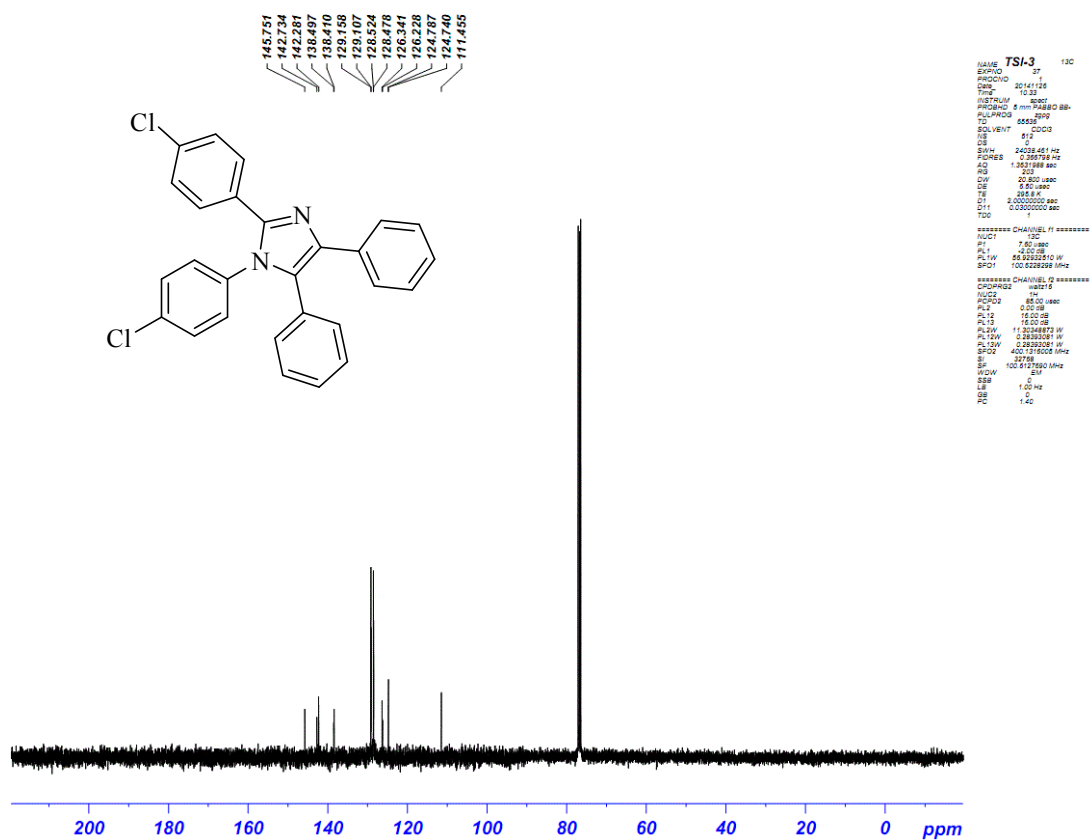



**Fig. S39.** The  $^1\text{H}$  NMR spectrum of 1-(4-bromophenyl)-2-(4-chlorophenyl)-4,5-diphenyl-1*H*-imidazole (Table 4, entry 6)

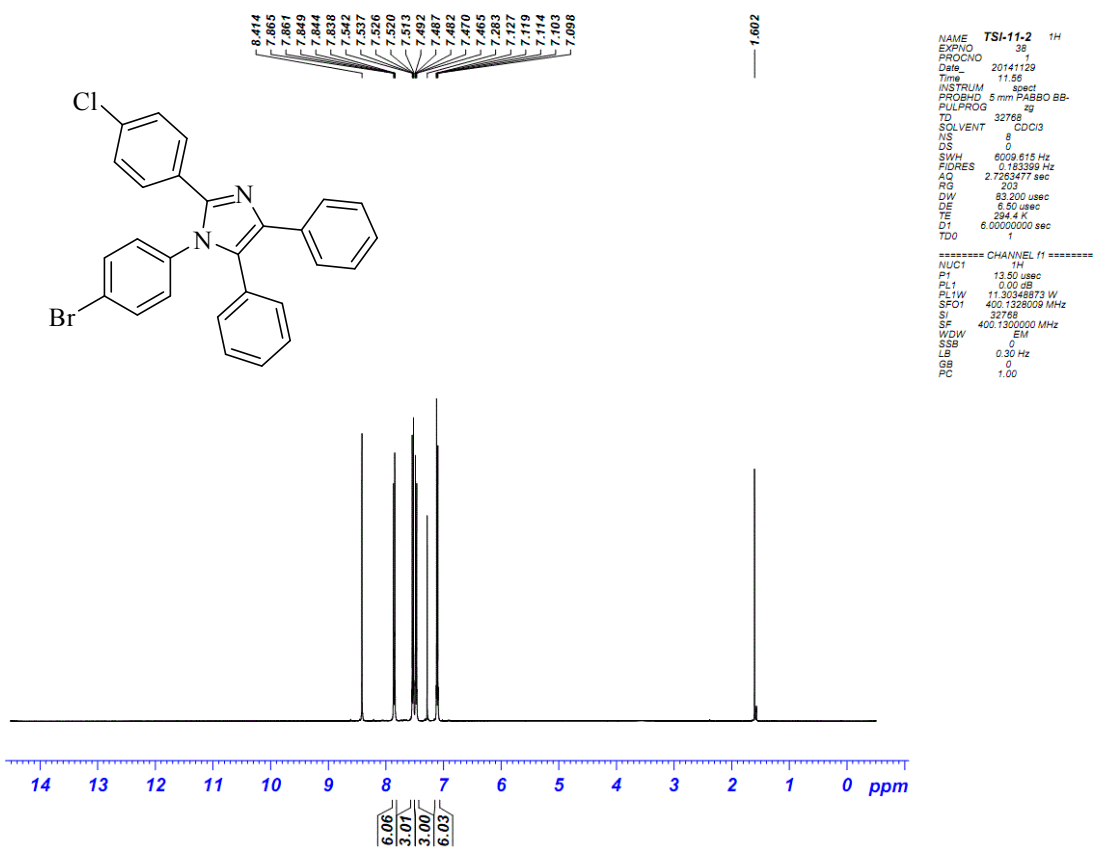

**Fig. S40.** The  $^1\text{H}$  NMR spectrum of 1-(4-bromophenyl)-2-(4-chlorophenyl)-4,5-diphenyl-1*H*-imidazole (Table 4, entry 6)

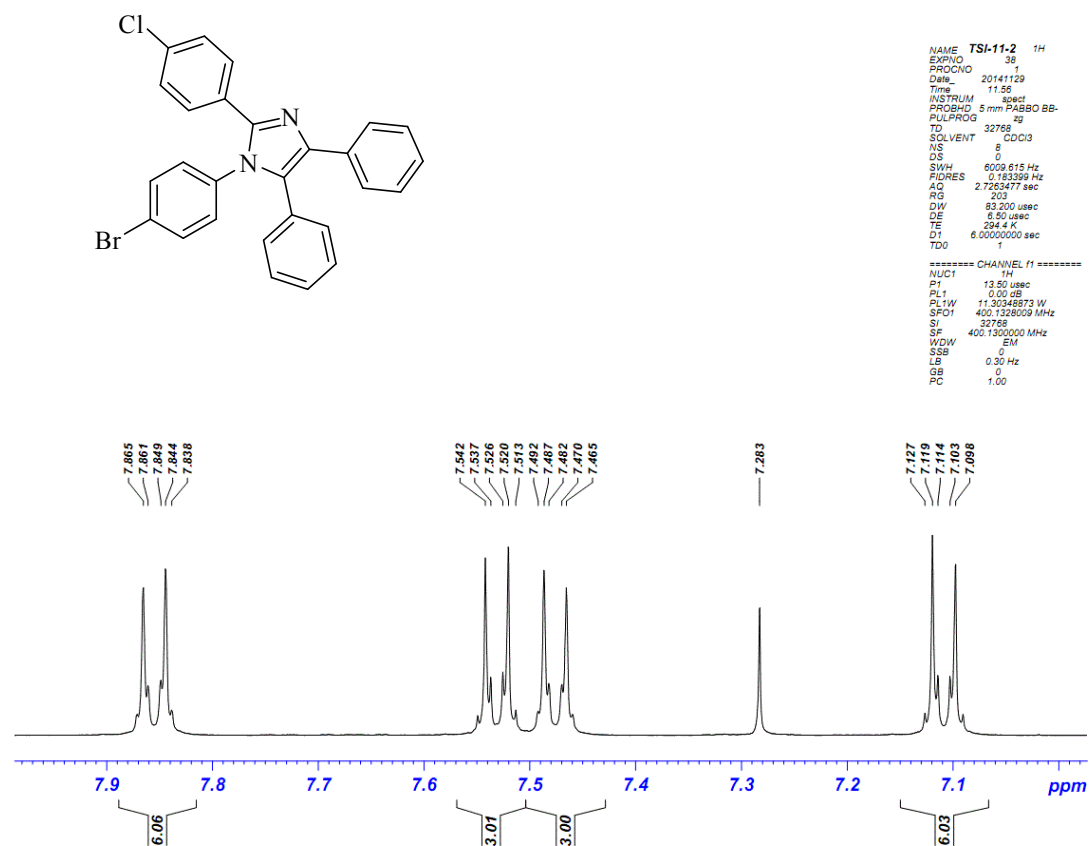

**Fig. S41.** The  $^{13}\text{C}$  NMR spectrum of 1-(4-bromophenyl)-2-(4-chlorophenyl)-4,5-diphenyl-1*H*-imidazole (Table 4, entry 6)

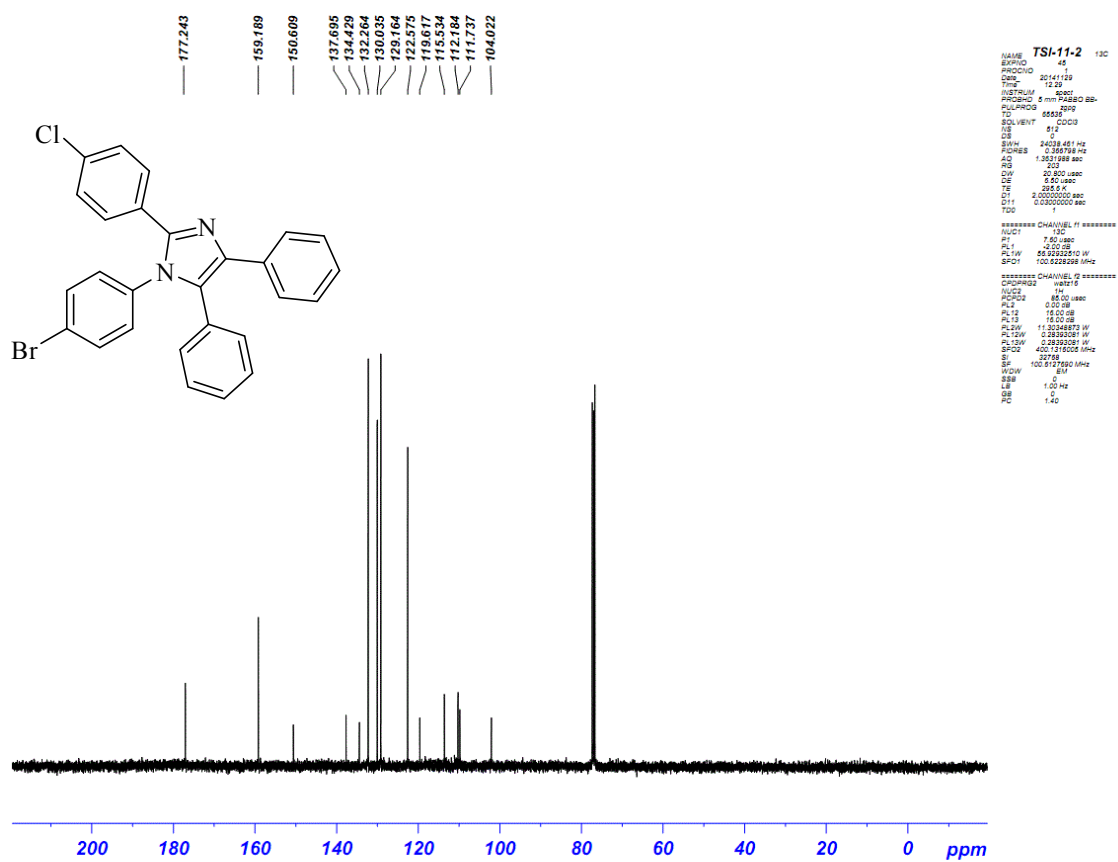

**Fig. S42.** The  $^{13}\text{C}$  NMR spectrum of 1-(4-bromophenyl)-2-(4-chlorophenyl)-4,5-diphenyl-1*H*-imidazole (Table 4, entry 6)

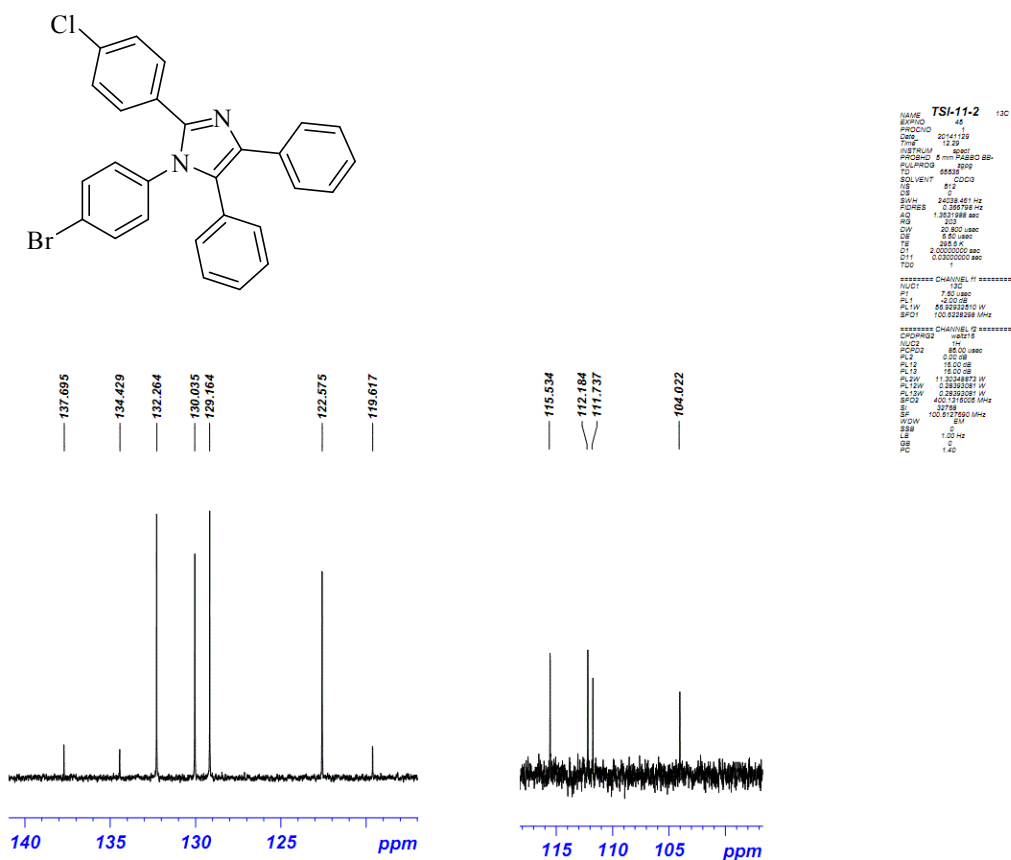

**Fig. S43.** The mass spectrum of 1-(4-bromophenyl)-2-(4-chlorophenyl)-4,5-diphenyl-1*H*-imidazole (Table 4, entry 6)

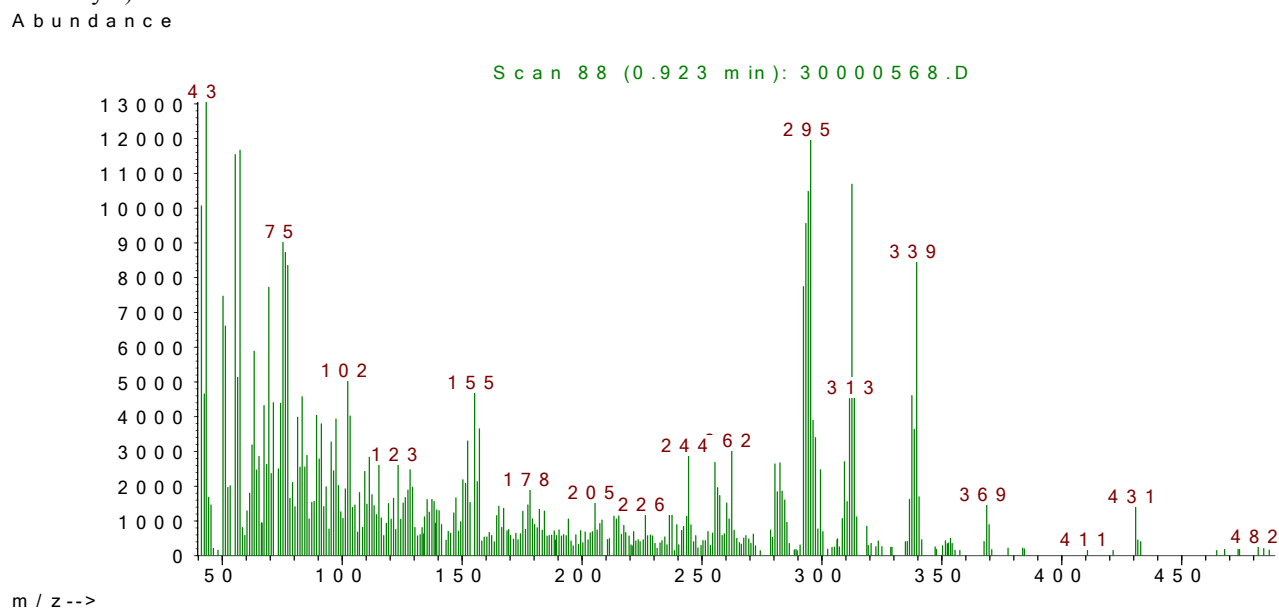

**Fig. S44.** The IR spectrum of 1-(4-chlorophenyl)-2-(2,4-dichlorophenyl)-4,5-diphenyl-1*H*-imidazole (Table 4, entry 7)

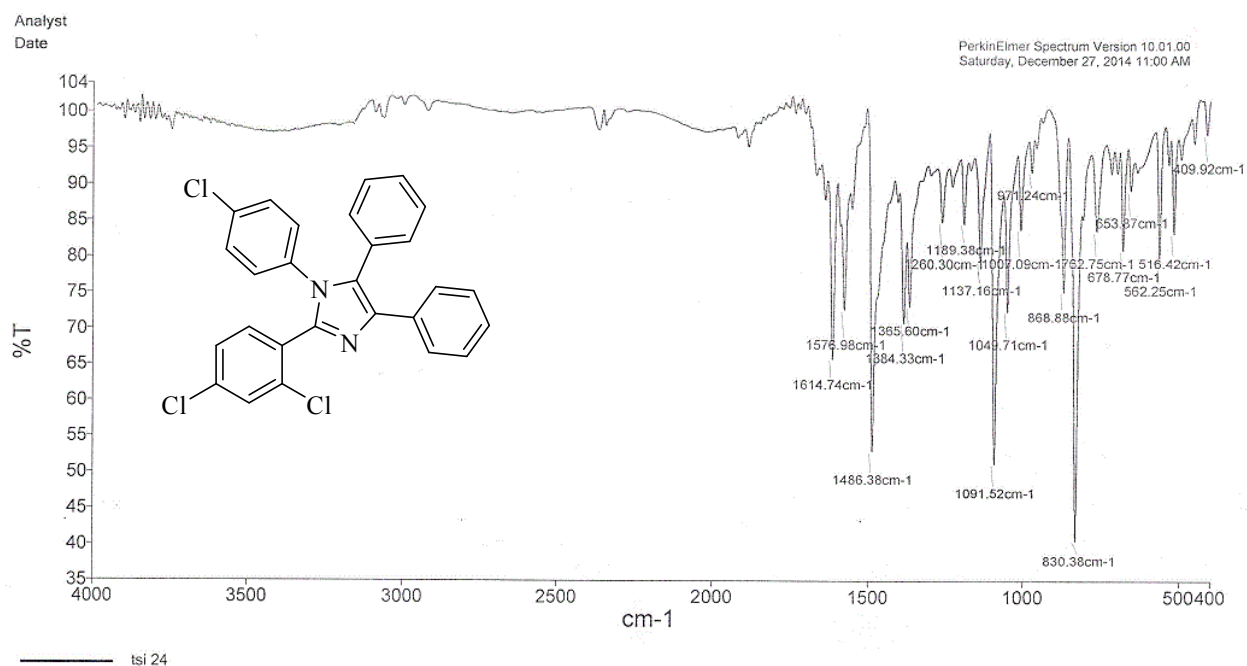

**Fig. S45.** The  $^1\text{H}$  NMR spectrum of 1-(4-chlorophenyl)-2-(2,4-dichlorophenyl)-4,5-diphenyl-1*H*-imidazole (Table 4, entry 7)

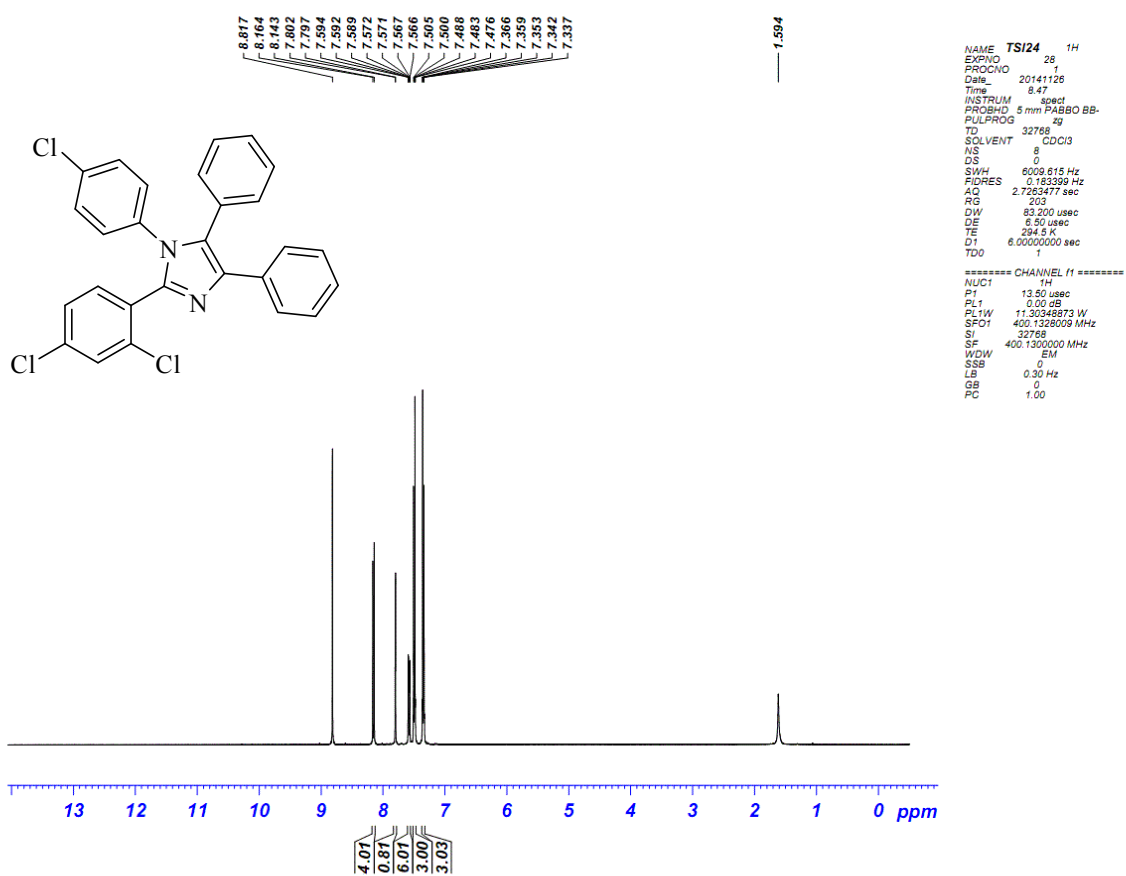



**Fig. S46.** The  $^1\text{H}$  NMR spectrum of 1-(4-chlorophenyl)-2-(2,4-dichlorophenyl)-4,5-diphenyl-1*H*-imidazole (Table 4, entry 7)

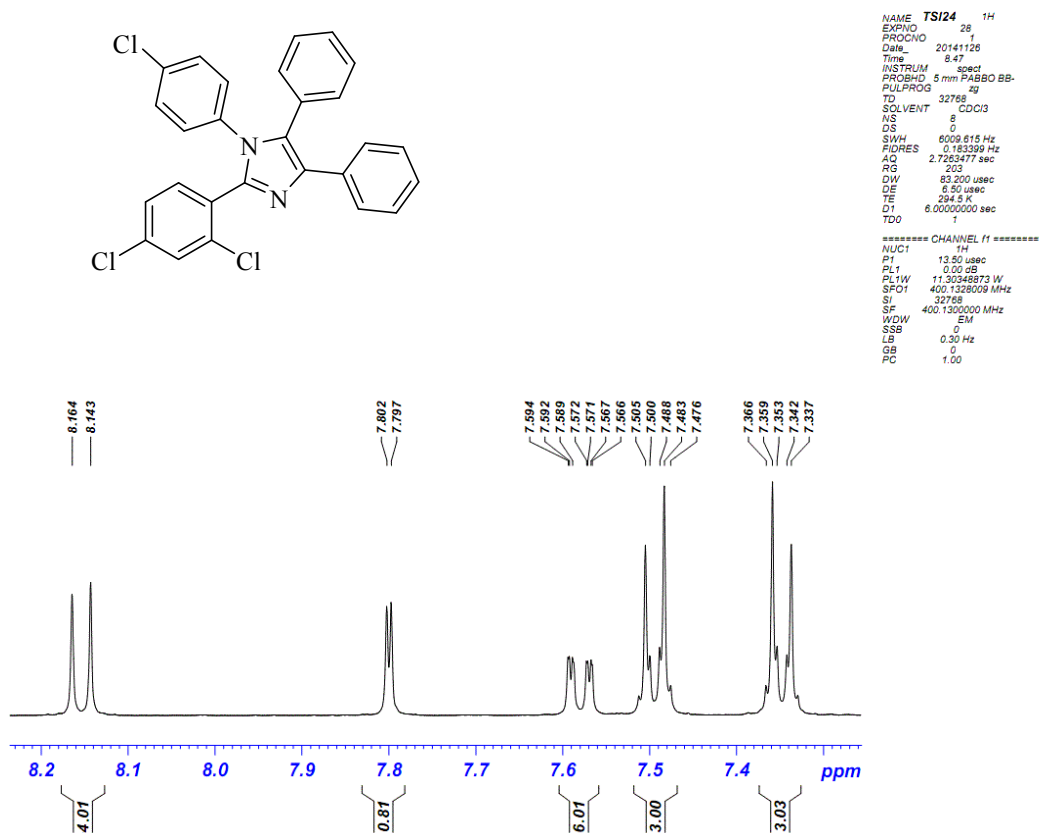

**Fig. S47.** The  $^{13}\text{C}$  NMR spectrum of 1-(4-chlorophenyl)-2-(2,4-dichlorophenyl)-4,5-diphenyl-1*H*-imidazole (Table 4, entry 7)

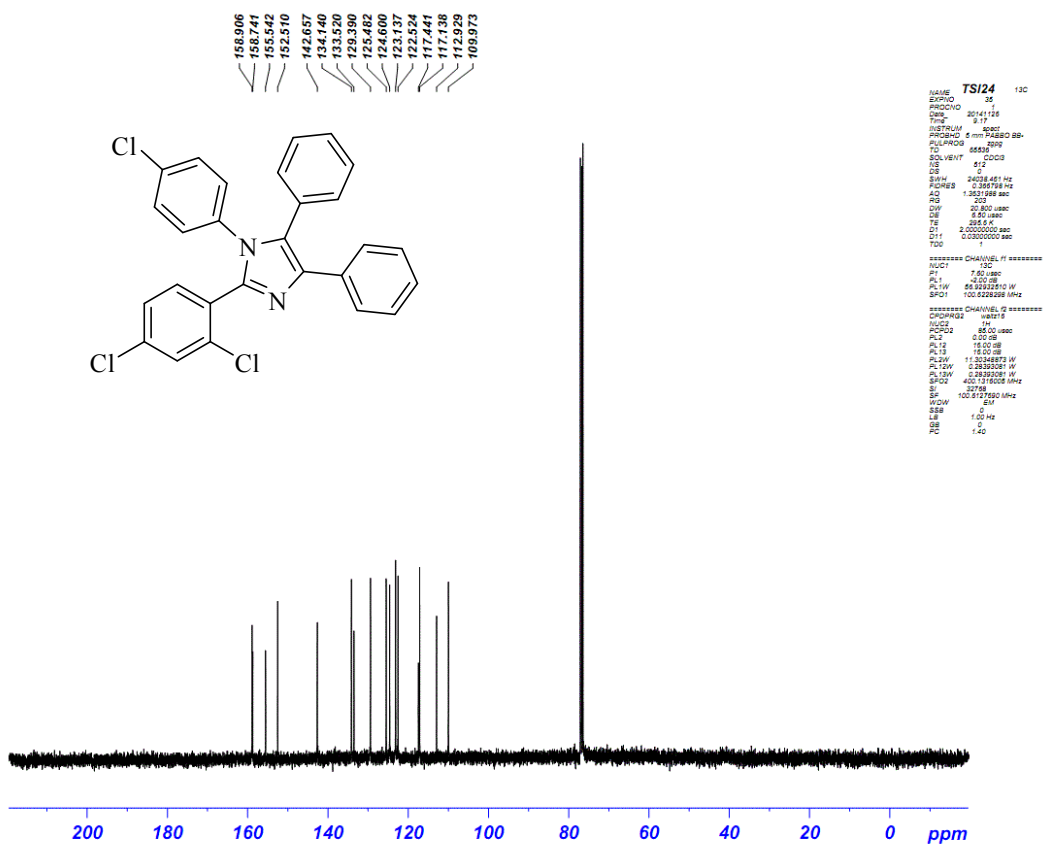

**Fig. S48.** The  $^{13}\text{C}$  NMR spectrum of 1-(4-chlorophenyl)-2-(2,4-dichlorophenyl)-4,5-diphenyl-1*H*-imidazole (Table 4, entry 7)

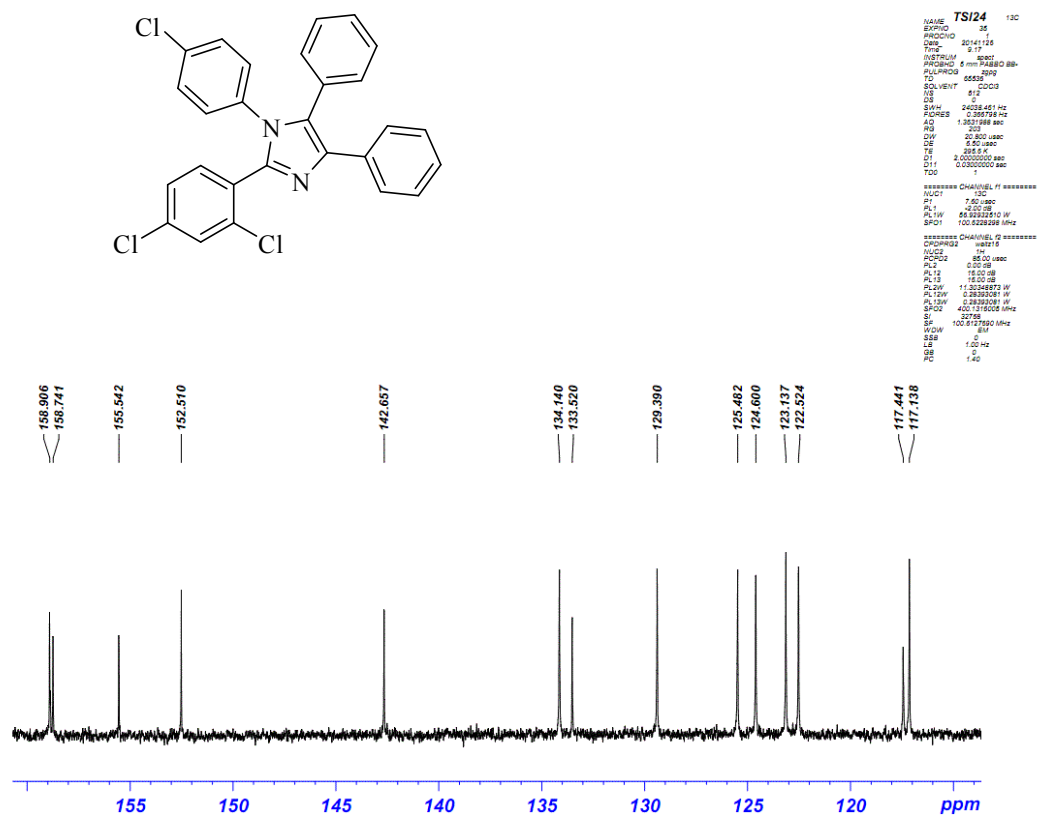

**Fig. S49.** The mass spectrum of 1-(4-chlorophenyl)-2-(2,4-dichlorophenyl)-4,5-diphenyl-1*H*-imidazole (Table 4, entry 7)

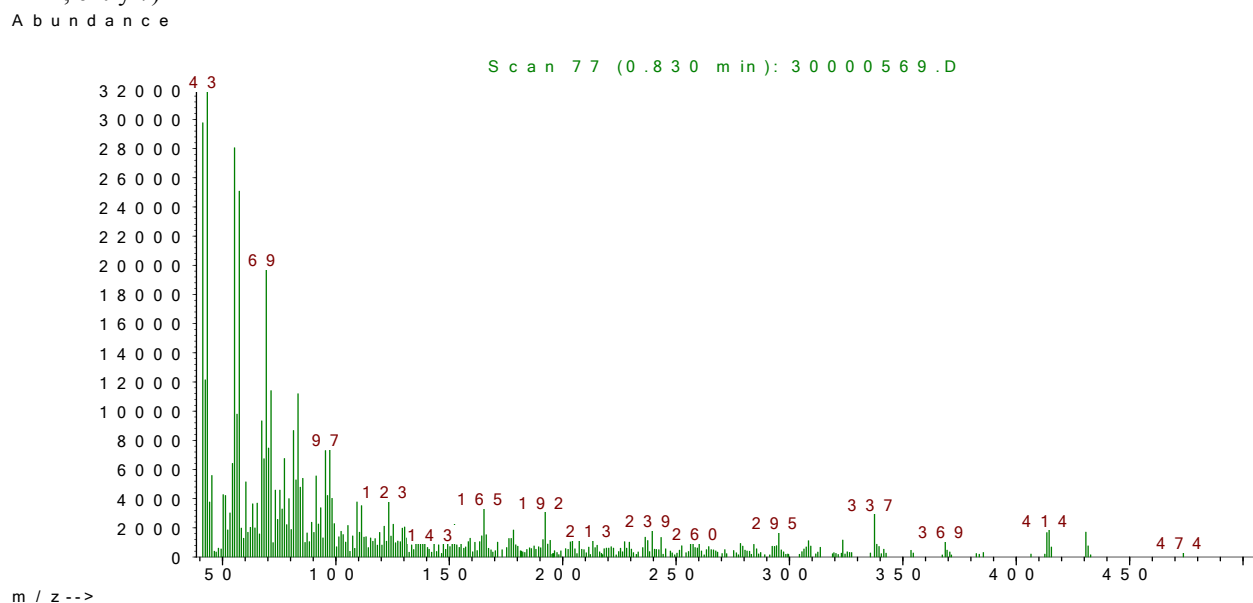

**Fig. S50.** The IR spectrum of 1-(4-bromophenyl)-2-(2,4-dichlorophenyl)-4,5-diphenyl-1*H*-imidazole (Table 4, entry 8)

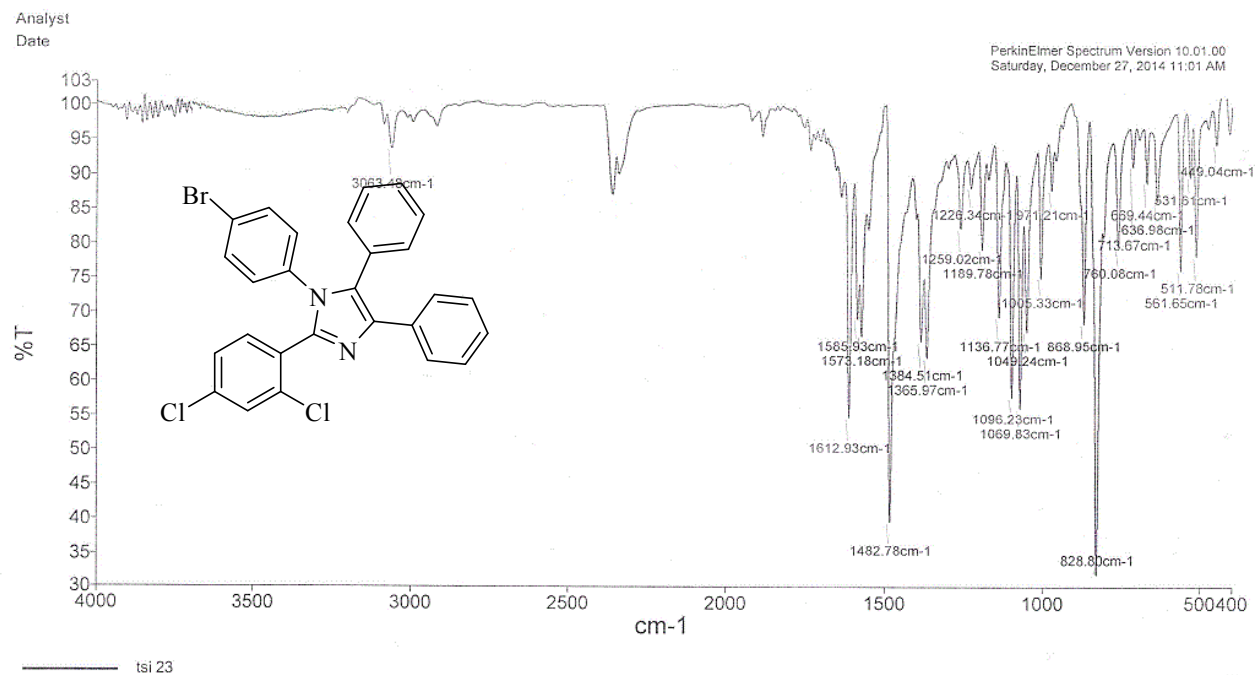

**Fig. S51.** The  $^1\text{H}$  NMR spectrum of 1-(4-bromophenyl)-2-(2,4-dichlorophenyl)-4,5-diphenyl-1*H*-imidazole (Table 4, entry 8)

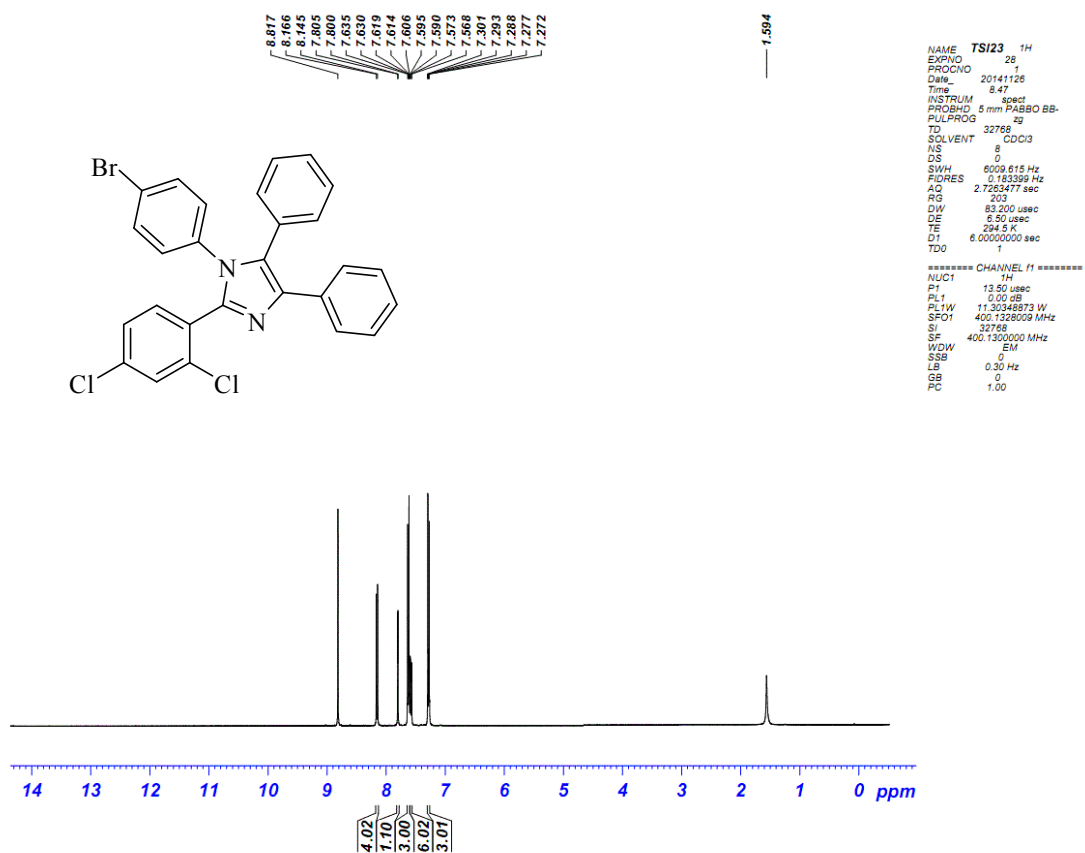

**Fig. S52.** The  $^1\text{H}$  NMR spectrum of 1-(4-bromophenyl)-2-(2,4-dichlorophenyl)-4,5-diphenyl-1*H*-imidazole (Table 4, entry 8)

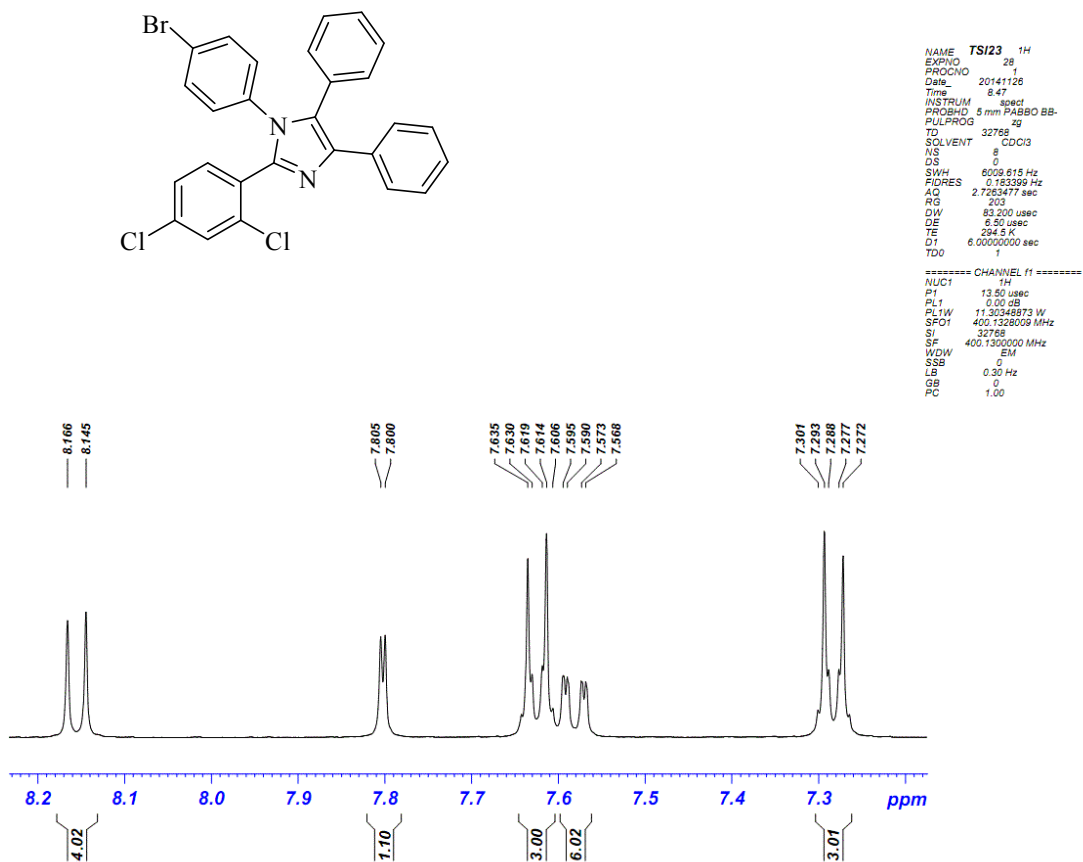

**Fig. S53.** The  $^{13}\text{C}$  NMR spectrum of 1-(4-bromophenyl)-2-(2,4-dichlorophenyl)-4,5-diphenyl-1*H*-imidazole (Table 4, entry 8)

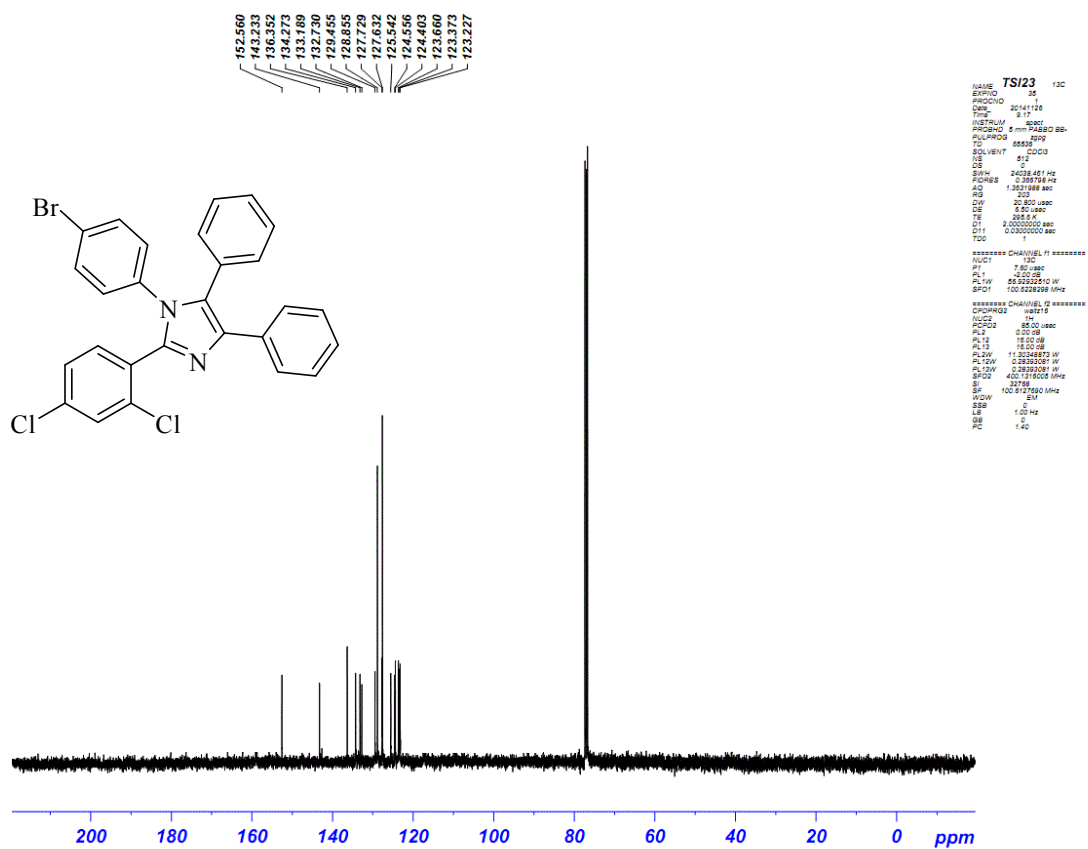

**Fig. S54.** The  $^{13}\text{C}$  NMR spectrum of 1-(4-bromophenyl)-2-(2,4-dichlorophenyl)-4,5-diphenyl-1*H*-imidazole (Table 4, entry 8)

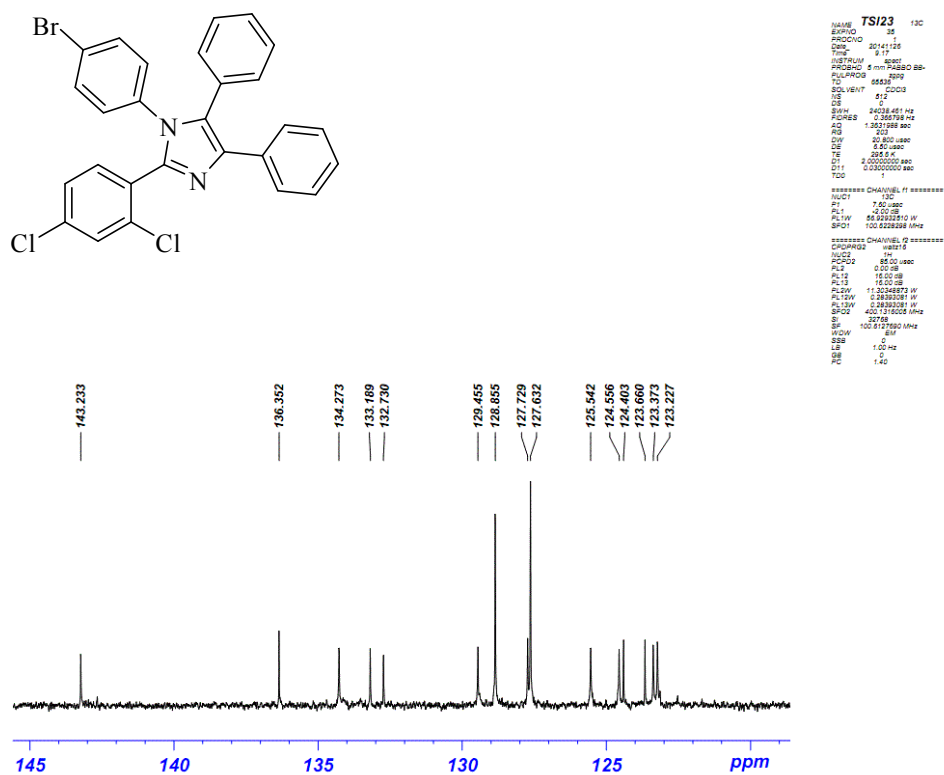

**Fig. S55.** The mass spectrum of 1-(4-bromophenyl)-2-(2,4-dichlorophenyl)-4,5-diphenyl-1*H*-imidazole (Table 4, entry 8)

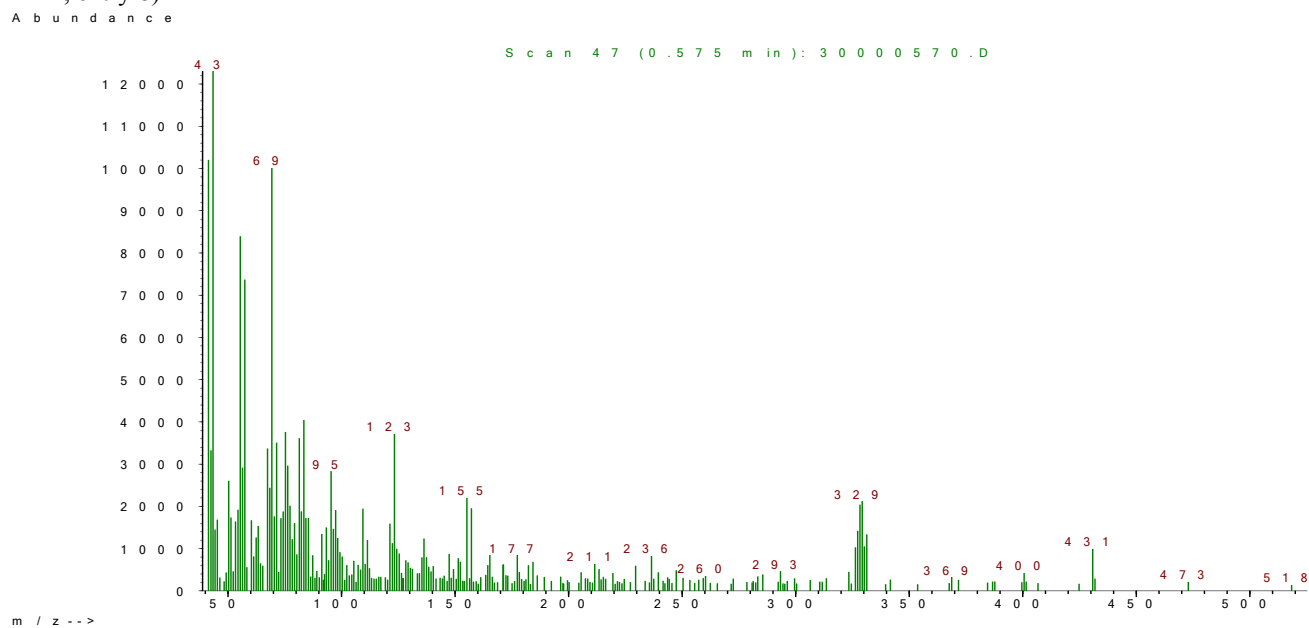



Fig. S56. The IR spectrum of 1-(4-chlorophenyl)-4,5-diphenyl-2-*p*-tolyl-1*H*-imidazole (Table 4, entry 9)

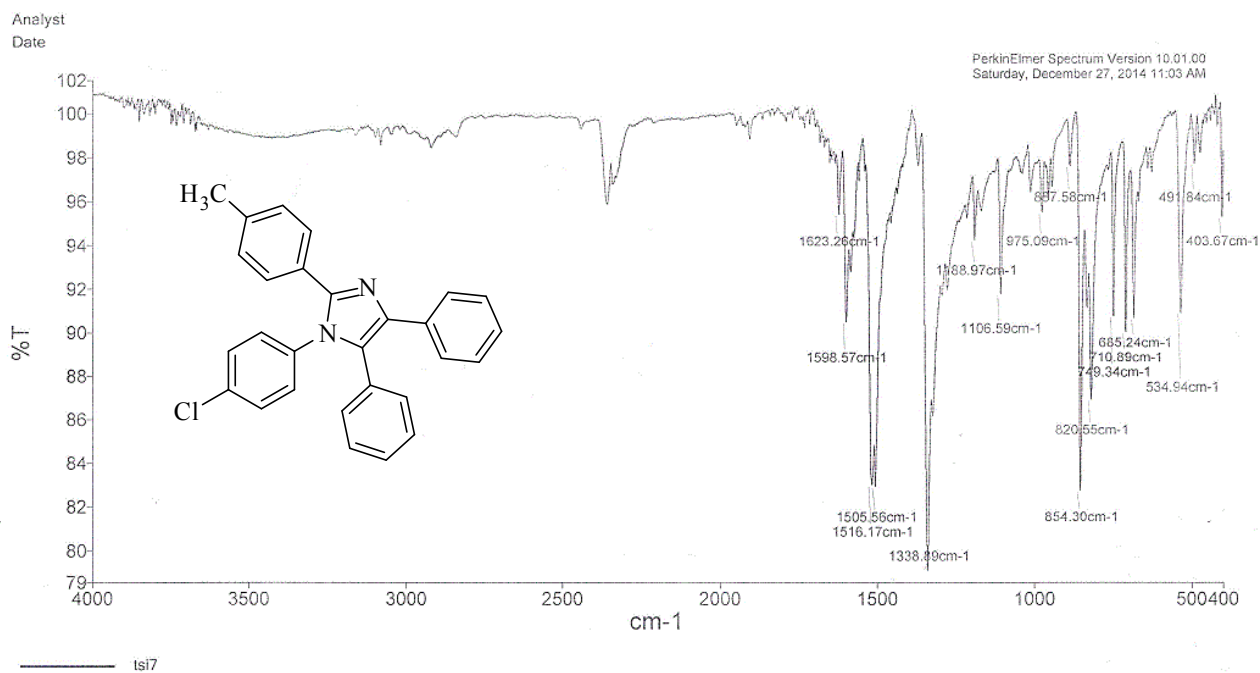

Fig. S57. The <sup>1</sup>H NMR spectrum of 1-(4-chlorophenyl)-4,5-diphenyl-2-*p*-tolyl-1*H*-imidazole (Table 4, entry 9)

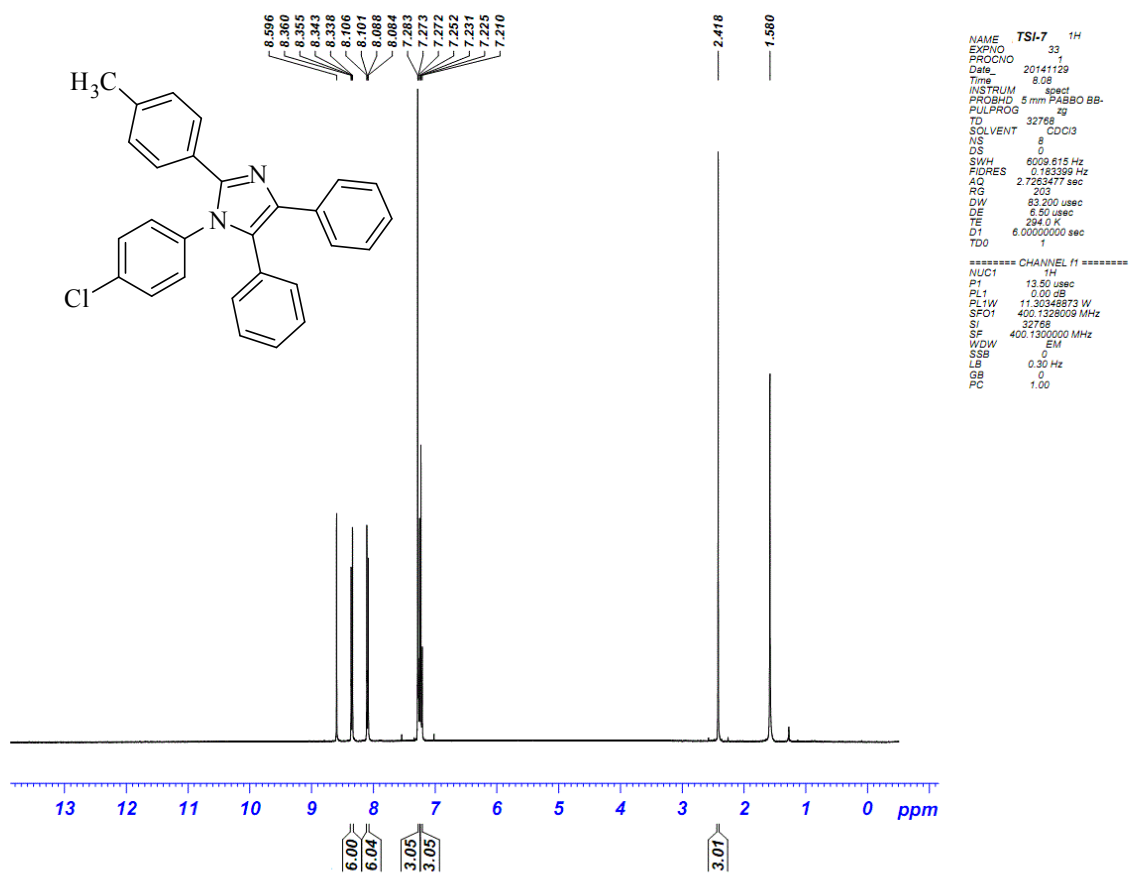

Fig. S58. The <sup>1</sup>H NMR spectrum of 1-(4-chlorophenyl)-4,5-diphenyl-2-*p*-tolyl-1*H*-imidazole (Table 4, entry 9)

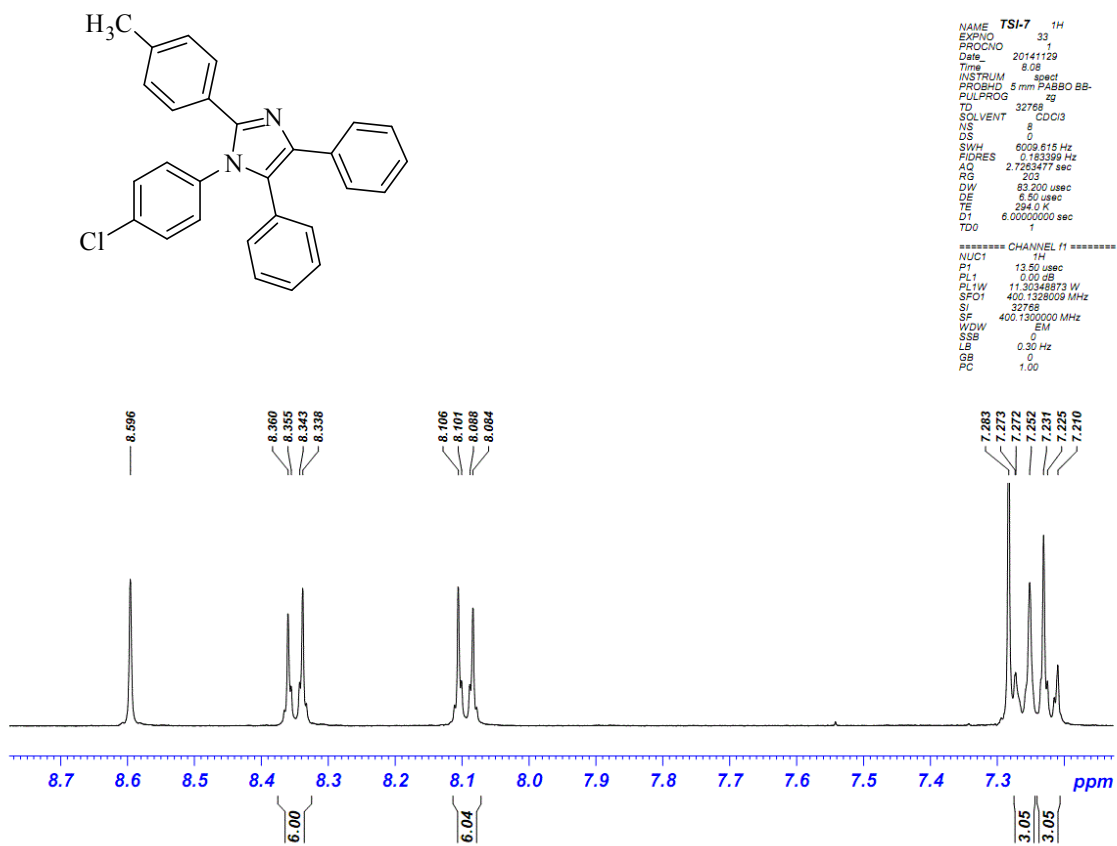

**Fig. S59.** The  $^{13}\text{C}$  NMR spectrum of 1-(4-chlorophenyl)-4,5-diphenyl-2-*p*-tolyl-1*H*-imidazole (Table 4, entry 9)

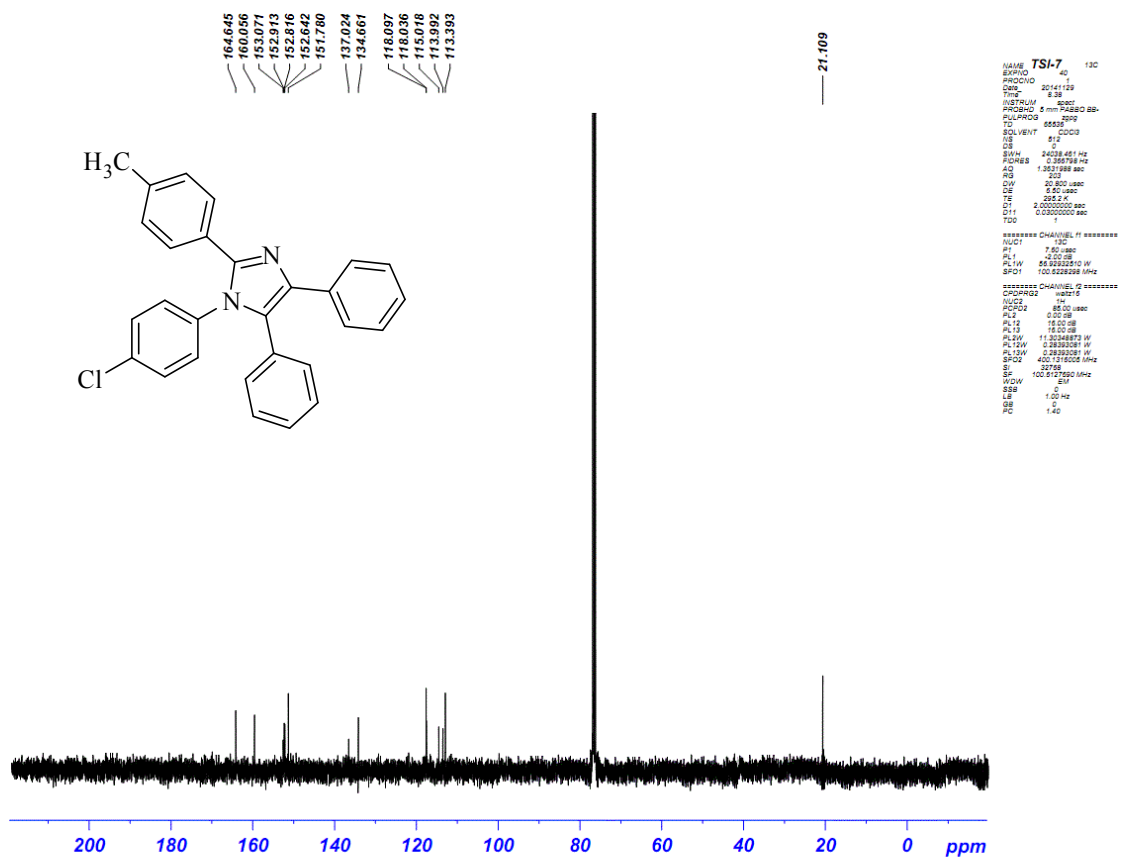

Fig. S60. The  $^{13}\text{C}$  NMR spectrum of 1-(4-chlorophenyl)-4,5-diphenyl-2-*p*-tolyl-1*H*-imidazole (Table 4, entry 9)

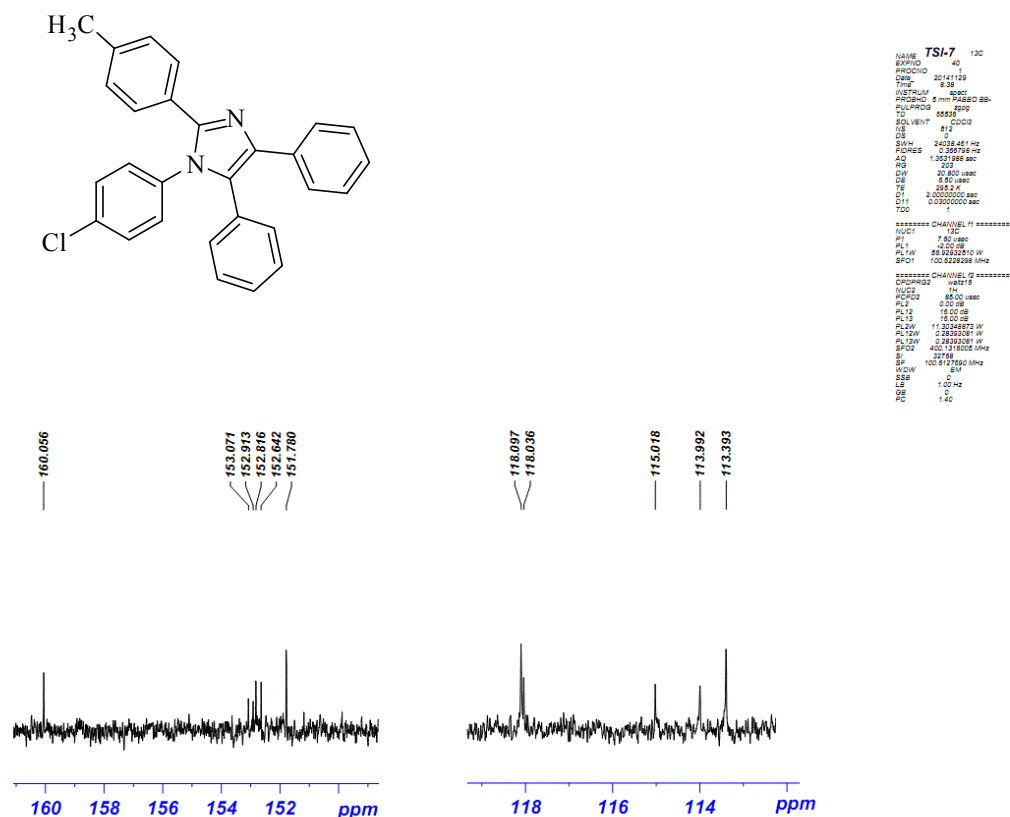

Fig. S61. The IR spectrum of 1-(4-bromophenyl)-4,5-diphenyl-2-*p*-tolyl-1*H*-imidazole (Table 4, entry 10)

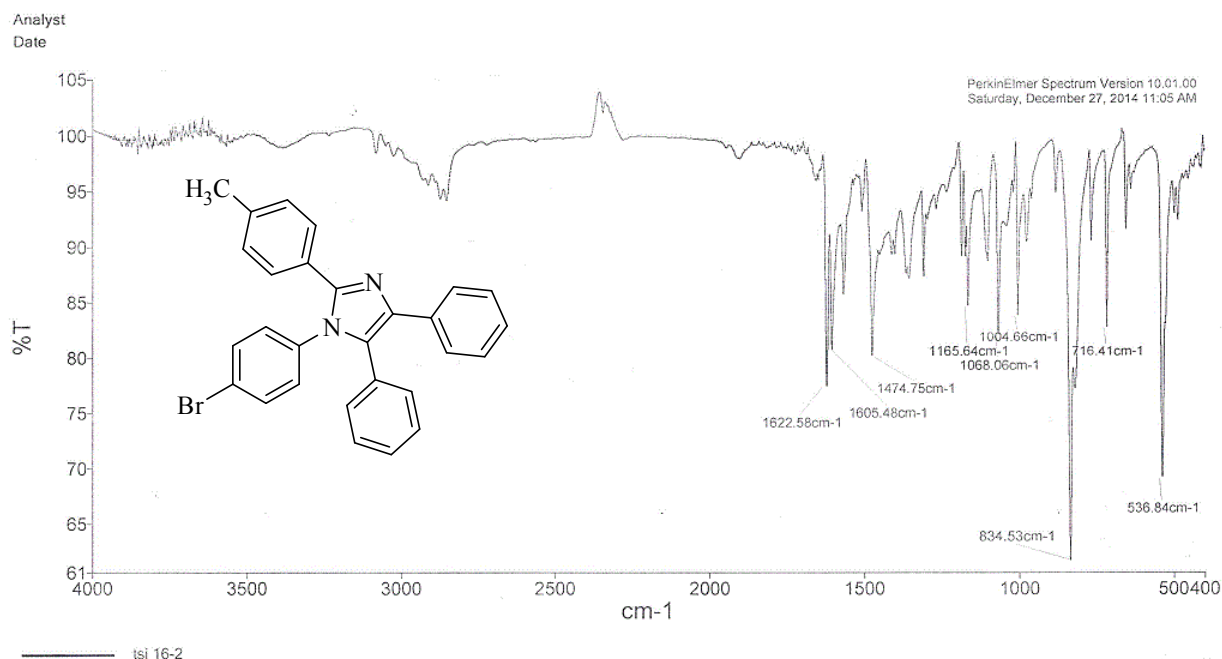

Fig. S62. The <sup>1</sup>H NMR spectrum of 1-(4-bromophenyl)-4,5-diphenyl-2-*p*-tolyl-1*H*-imidazole (Table 4, entry 10)

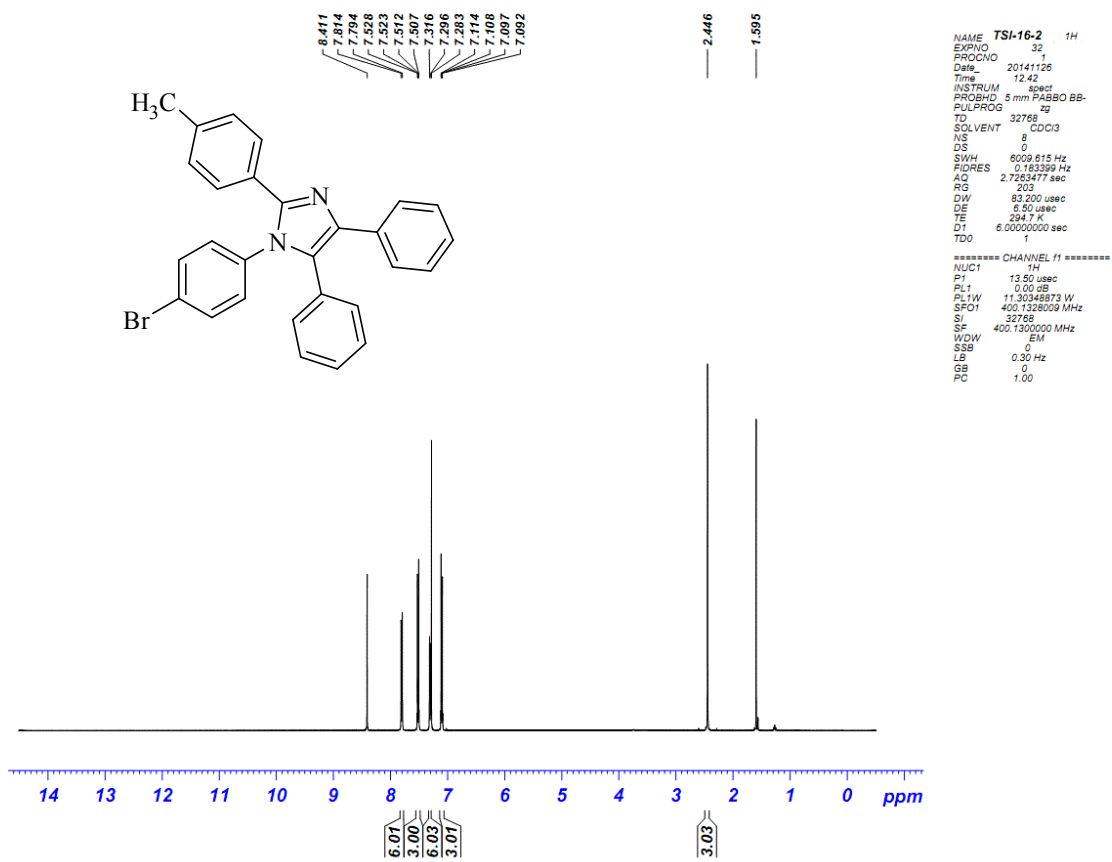

Fig. S63. The <sup>1</sup>H NMR spectrum of 1-(4-bromophenyl)-4,5-diphenyl-2-*p*-tolyl-1*H*-imidazole (Table 4, entry 10)

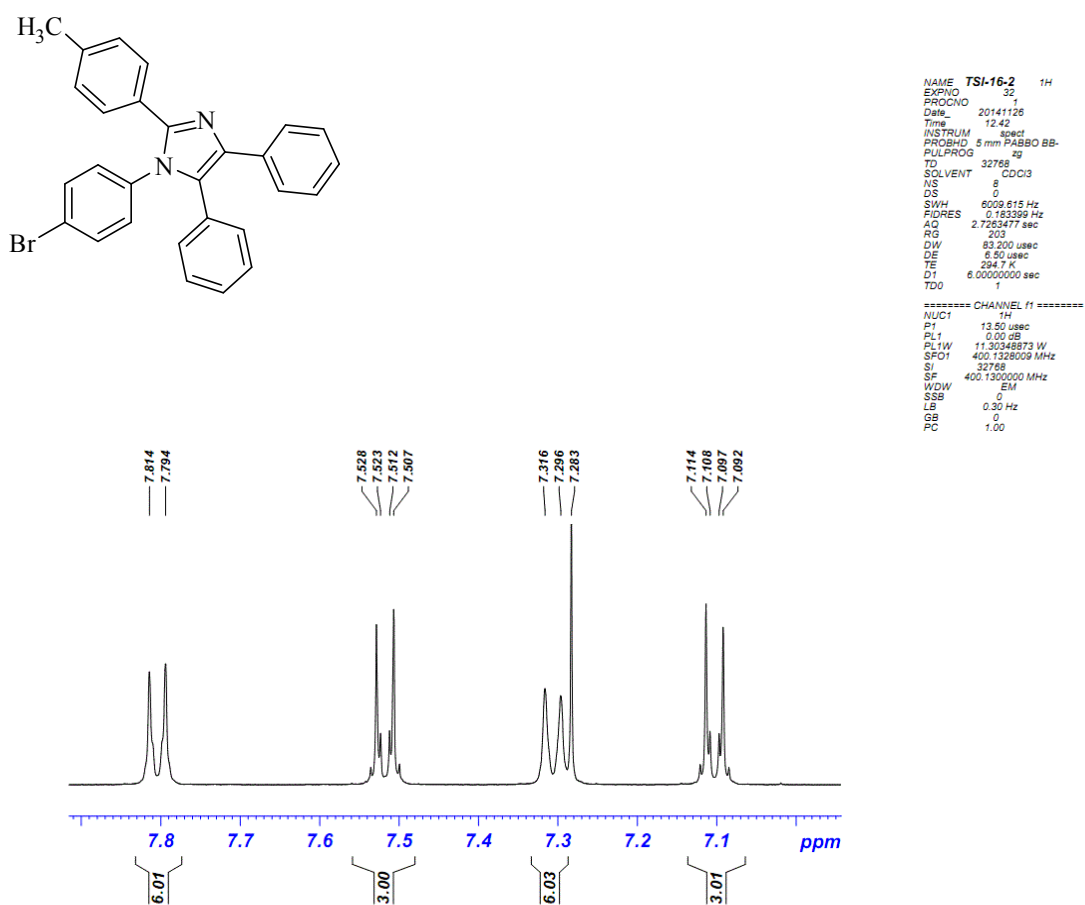

**Fig. S64.** The  $^{13}\text{C}$  NMR spectrum of 1-(4-bromophenyl)-4,5-diphenyl-2-*p*-tolyl-1*H*-imidazole (Table 4, entry 10)

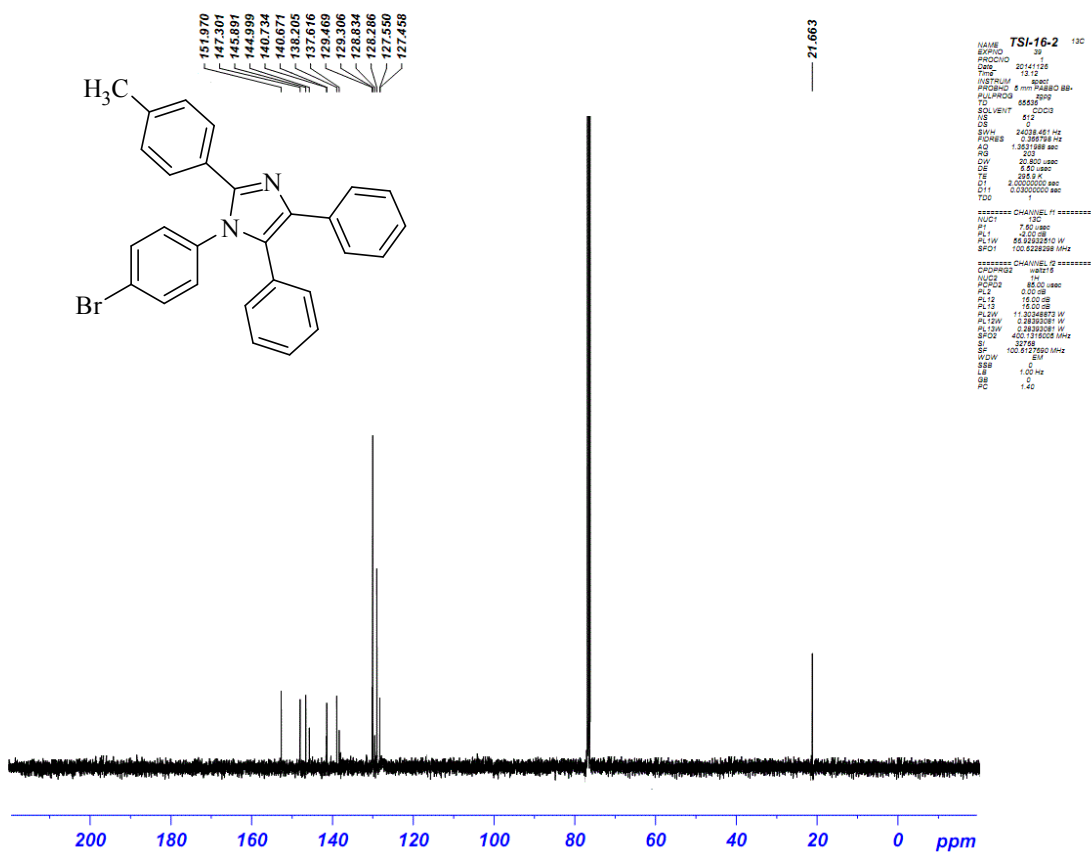

**Fig. S65.** The  $^{13}\text{C}$  NMR spectrum of 1-(4-bromophenyl)-4,5-diphenyl-2-*p*-tolyl-1*H*-imidazole (Table 4, entry 10)

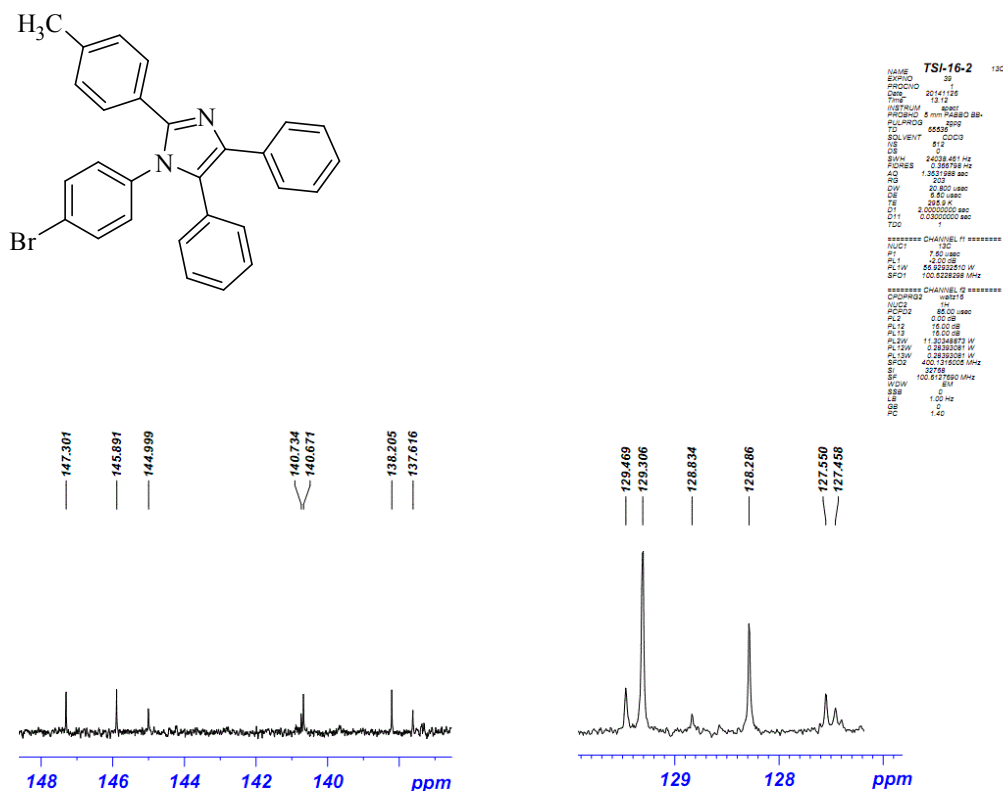

**Fig. S66.** The mass spectrum of 1-(4-bromophenyl)-4,5-diphenyl-2-*p*-tolyl-1*H*-imidazole (Table 4, entry 10)

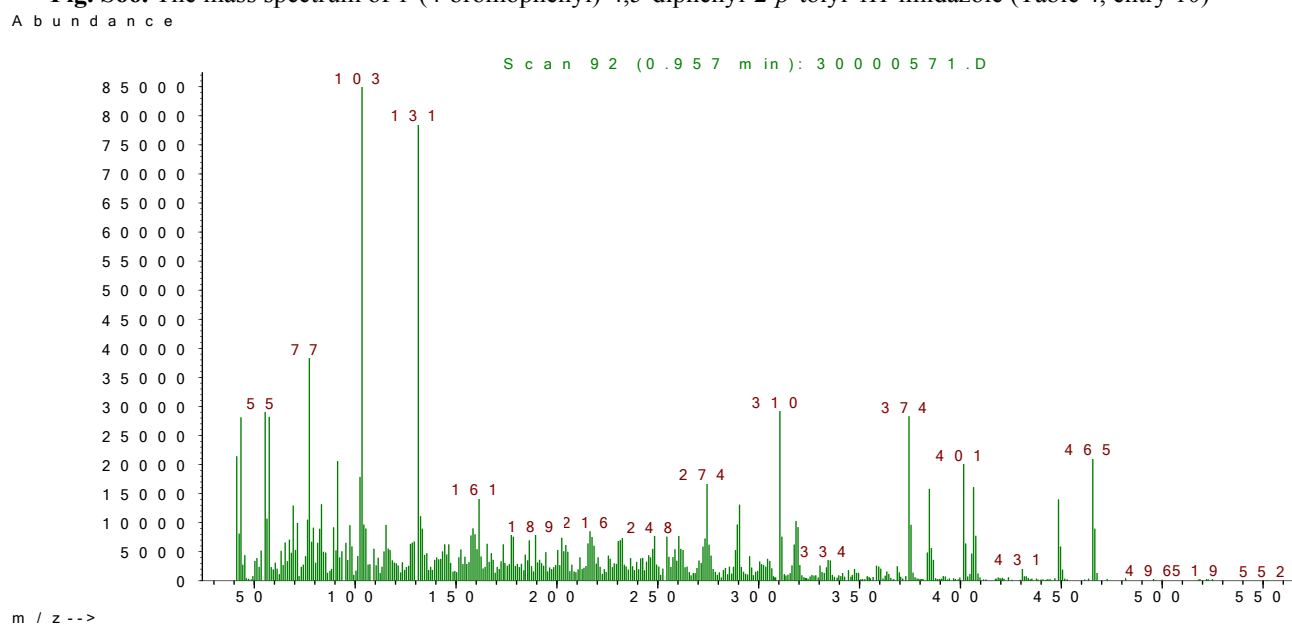



**Fig. S67.** The IR spectrum of 1-(4-bromophenyl)-2-(4-methoxyphenyl)-4,5-diphenyl-1*H*-imidazole (Table 4, entry 11)

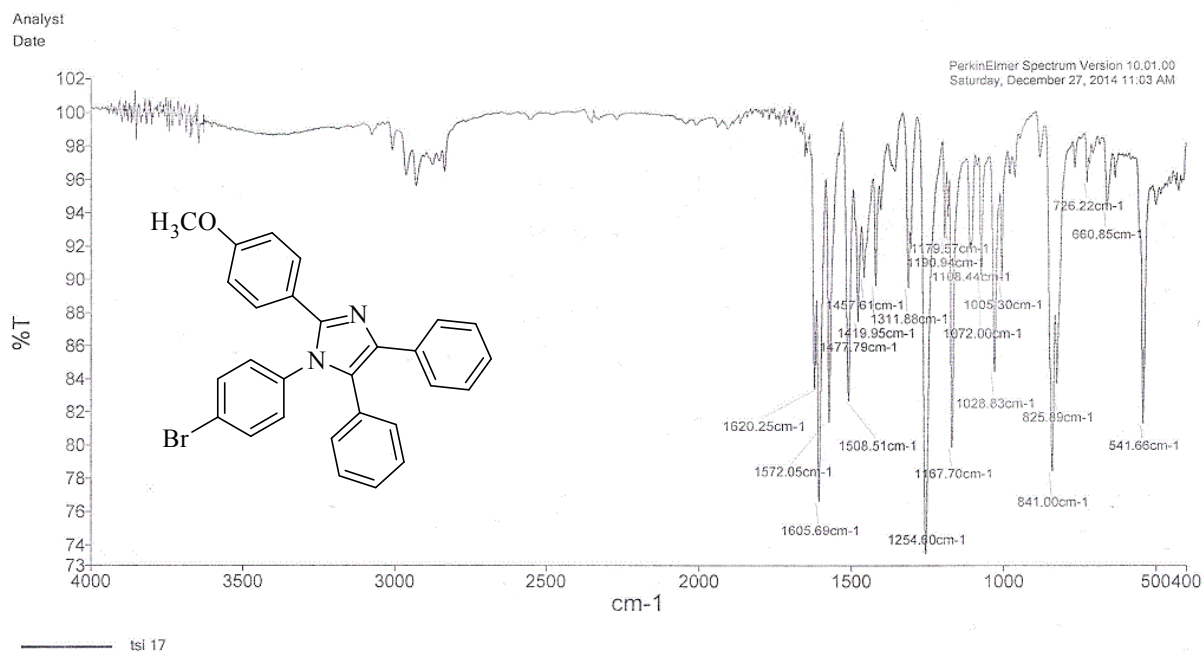

**Fig. S68.** The  $^1\text{H}$  NMR spectrum of 1-(4-bromophenyl)-2-(4-methoxyphenyl)-4,5-diphenyl-1*H*-imidazole (Table 4, entry 11)

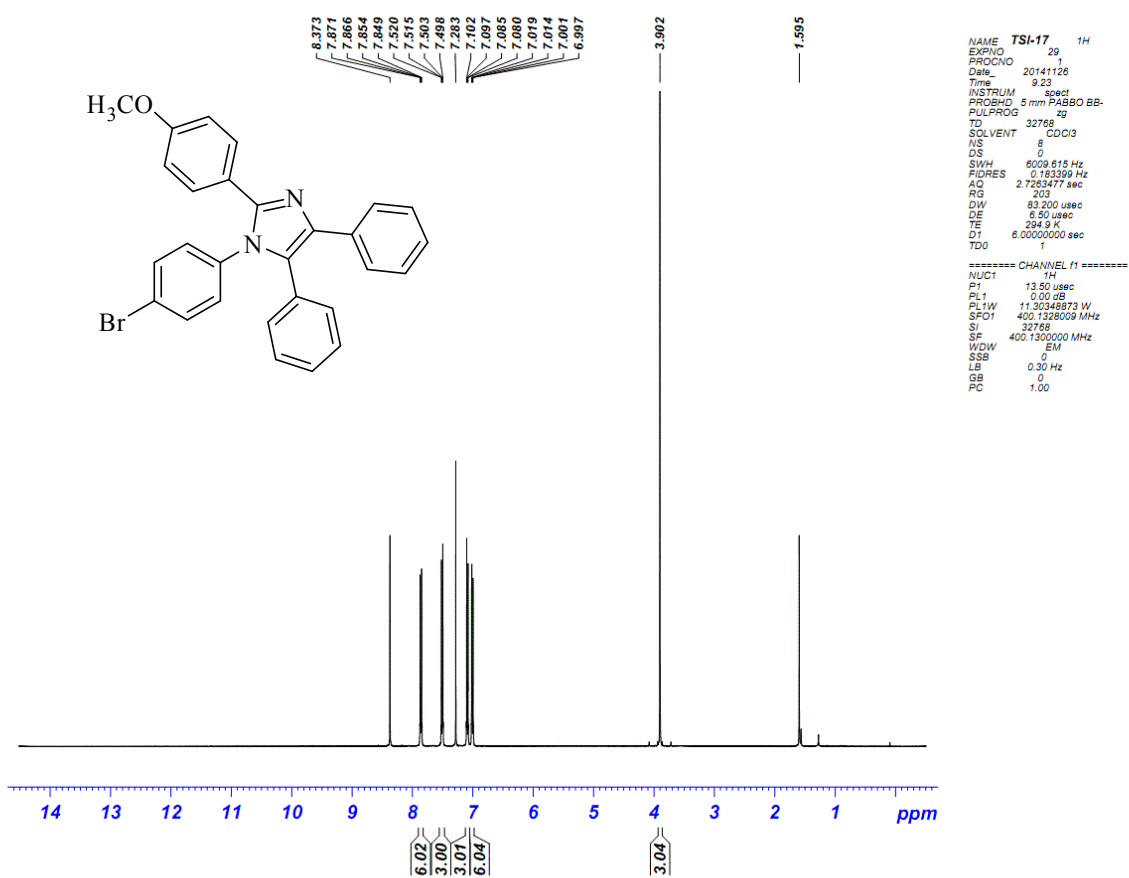

**Fig. S69.** The  $^1\text{H}$  NMR spectrum of 1-(4-bromophenyl)-2-(4-methoxyphenyl)-4,5-diphenyl-1*H*-imidazole (Table 4, entry 11)

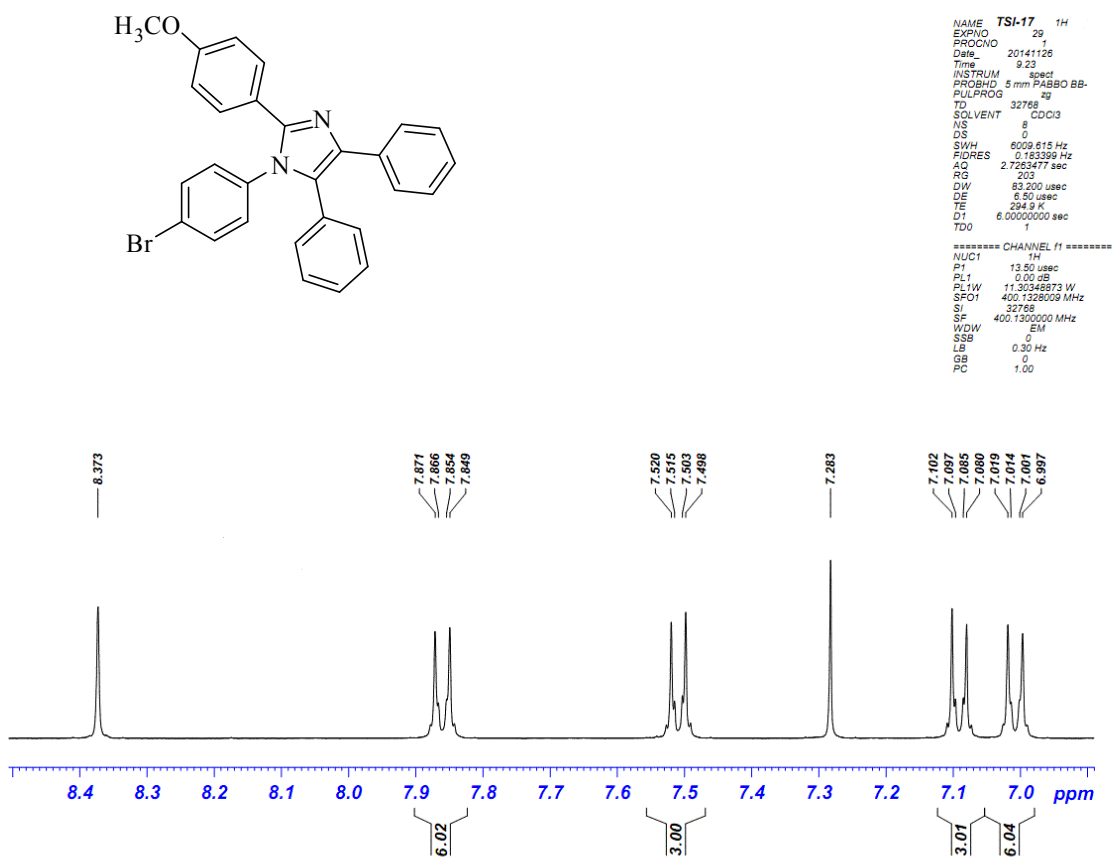

**Fig. S70.** The  $^{13}\text{C}$  NMR spectrum of 1-(4-bromophenyl)-2-(4-methoxyphenyl)-4,5-diphenyl-1*H*-imidazole (Table 4, entry 11)

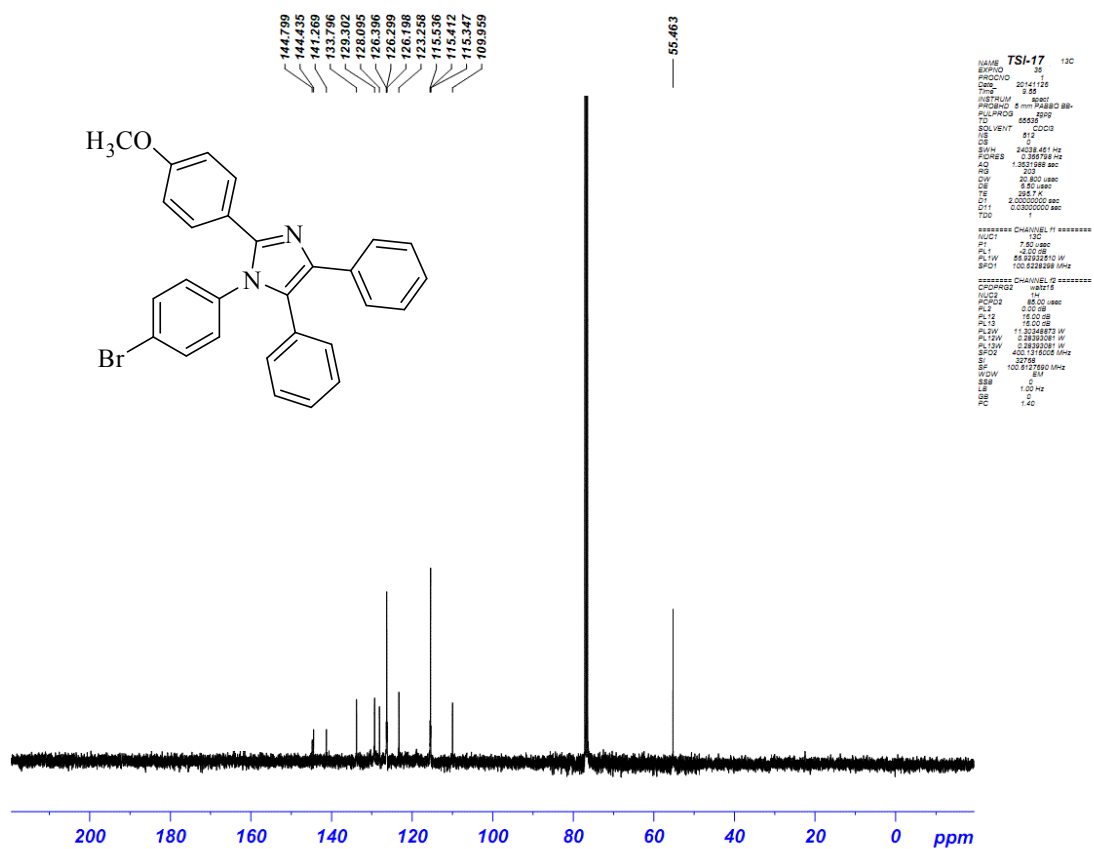

**Fig. S71.** The  $^{13}\text{C}$  NMR spectrum of 1-(4-bromophenyl)-2-(4-methoxyphenyl)-4,5-diphenyl-1*H*-imidazole (Table 4, entry 11)

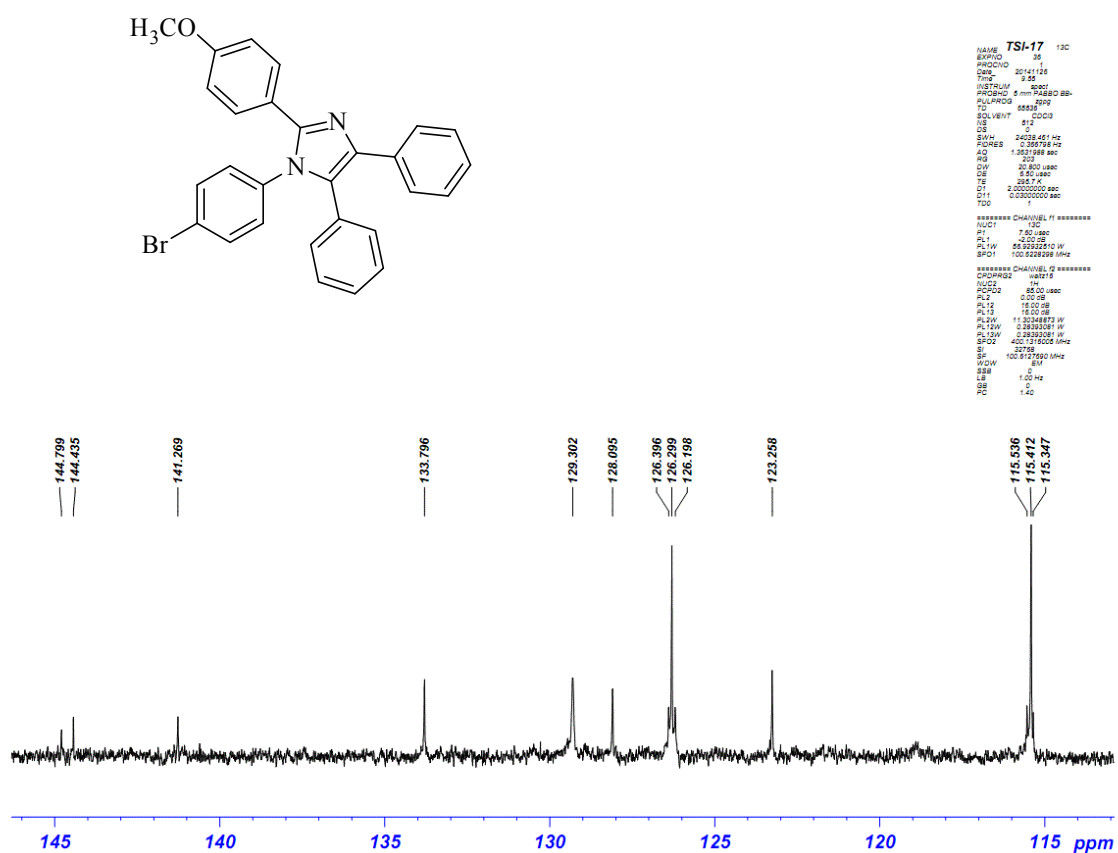

**Fig. S72.** The mass spectrum of 1-(4-bromophenyl)-2-(4-methoxyphenyl)-4,5-diphenyl-1*H*-imidazole (Table 4, entry 11)

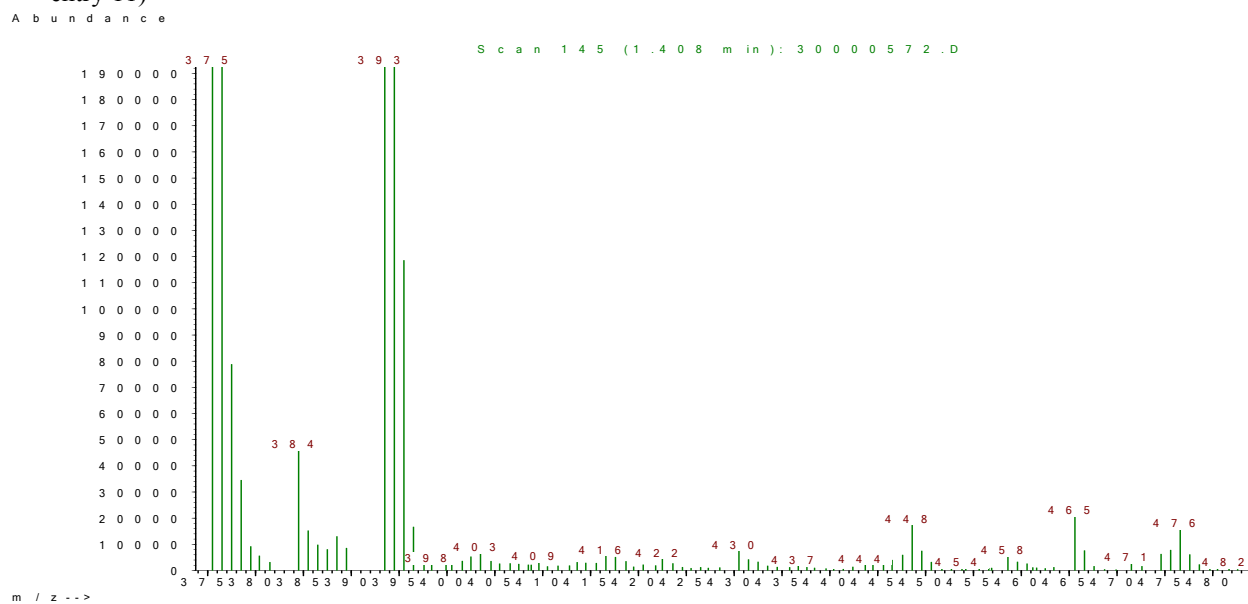

**Fig. S73.** The IR spectrum of 1-(4-bromophenyl)-2-(4-chloro-3-nitrophenyl)-4,5-diphenyl-1*H*-imidazole (Table 4, entry 12)

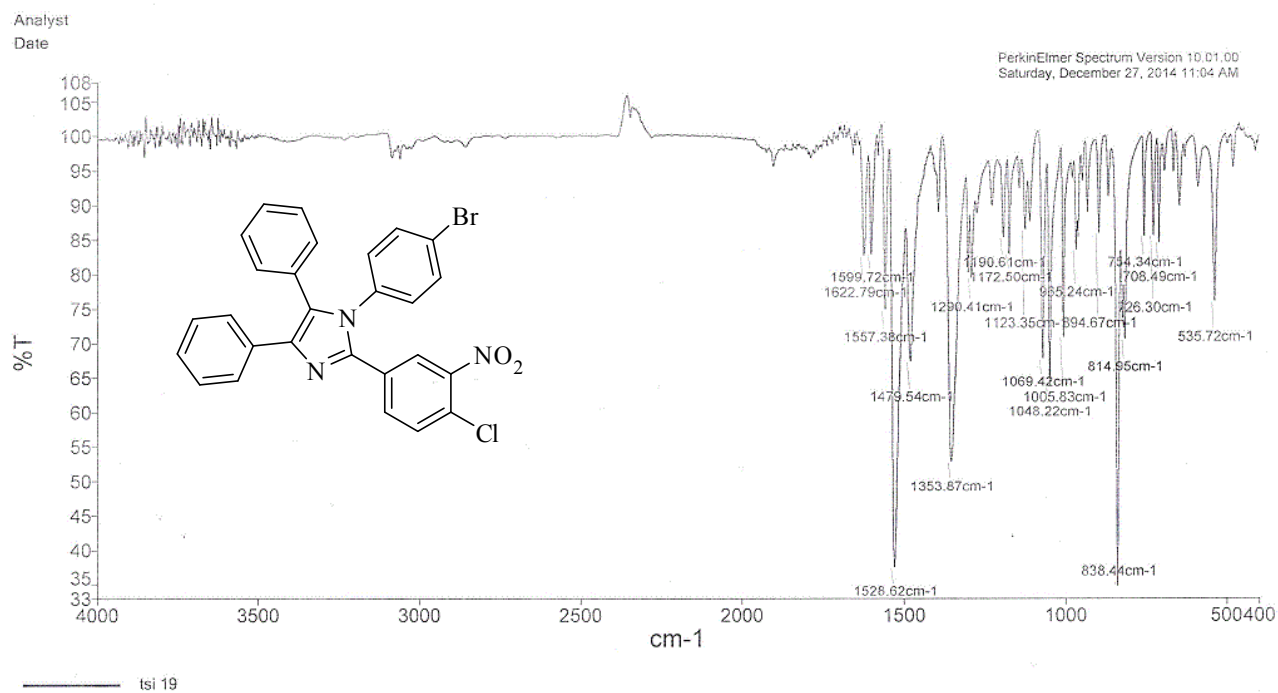

**Fig. S74.** The  $^1\text{H}$  NMR spectrum of 1-(4-bromophenyl)-2-(4-chloro-3-nitrophenyl)-4,5-diphenyl-1*H*-imidazole (Table 4, entry 12)

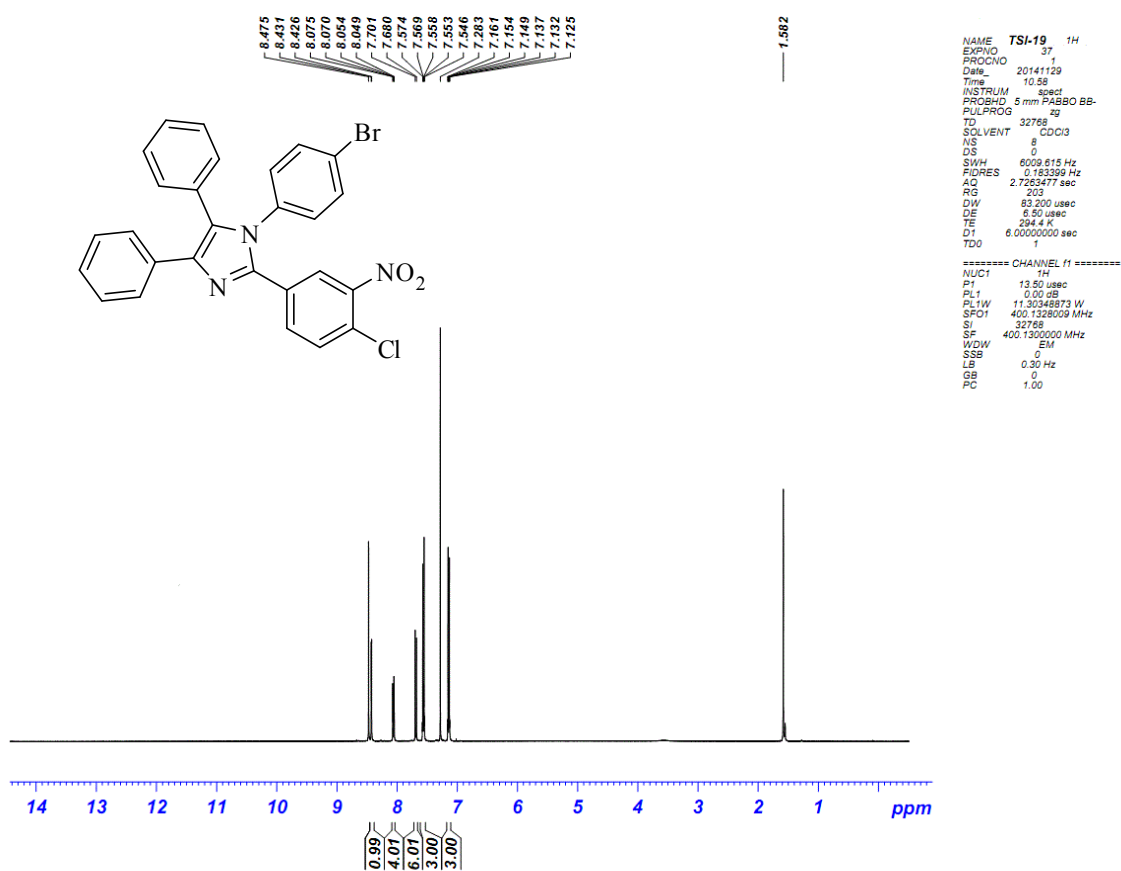

**Fig. S75.** The  $^1\text{H}$  NMR spectrum of 1-(4-bromophenyl)-2-(4-chloro-3-nitrophenyl)-4,5-diphenyl-1*H*-imidazole (Table 4, entry 12)

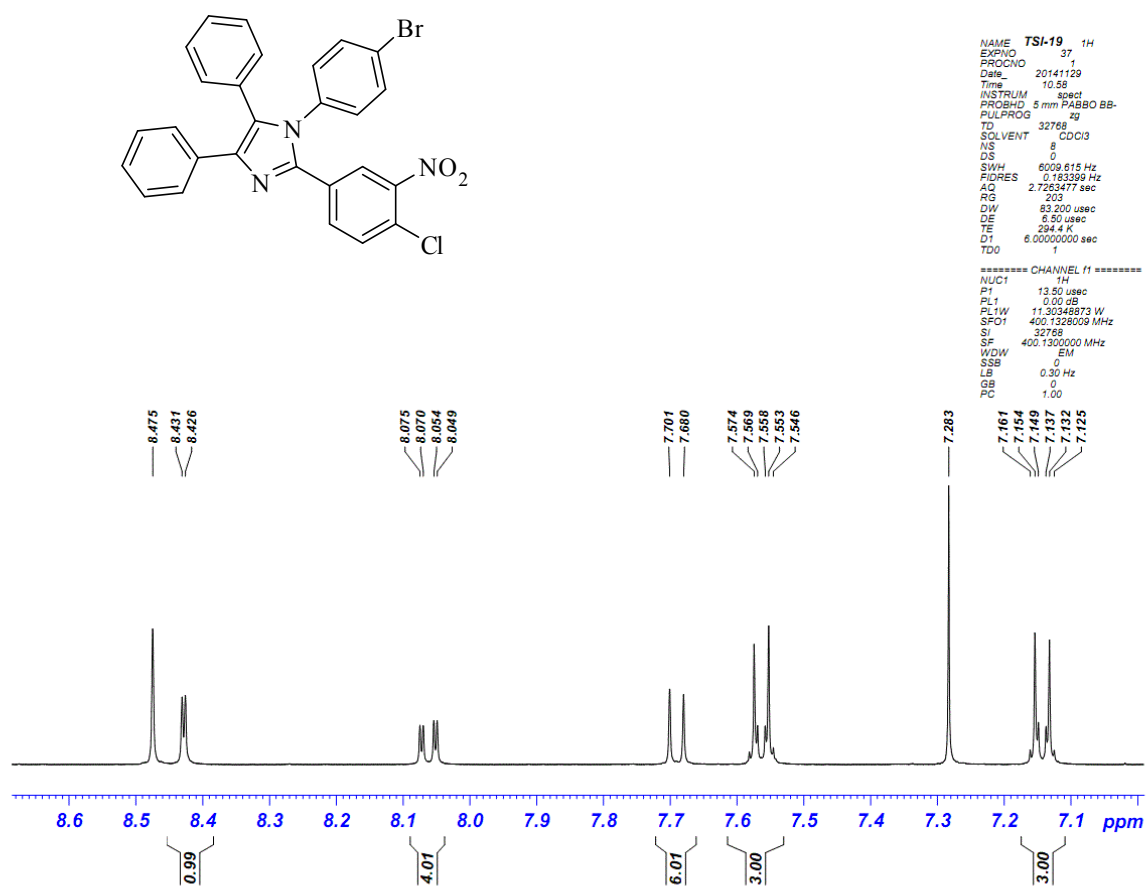



**Fig. S76.** The  $^{13}\text{C}$  NMR spectrum of 1-(4-bromophenyl)-2-(4-chloro-3-nitrophenyl)-4,5-diphenyl-1*H*-imidazole (Table 4, entry 12)

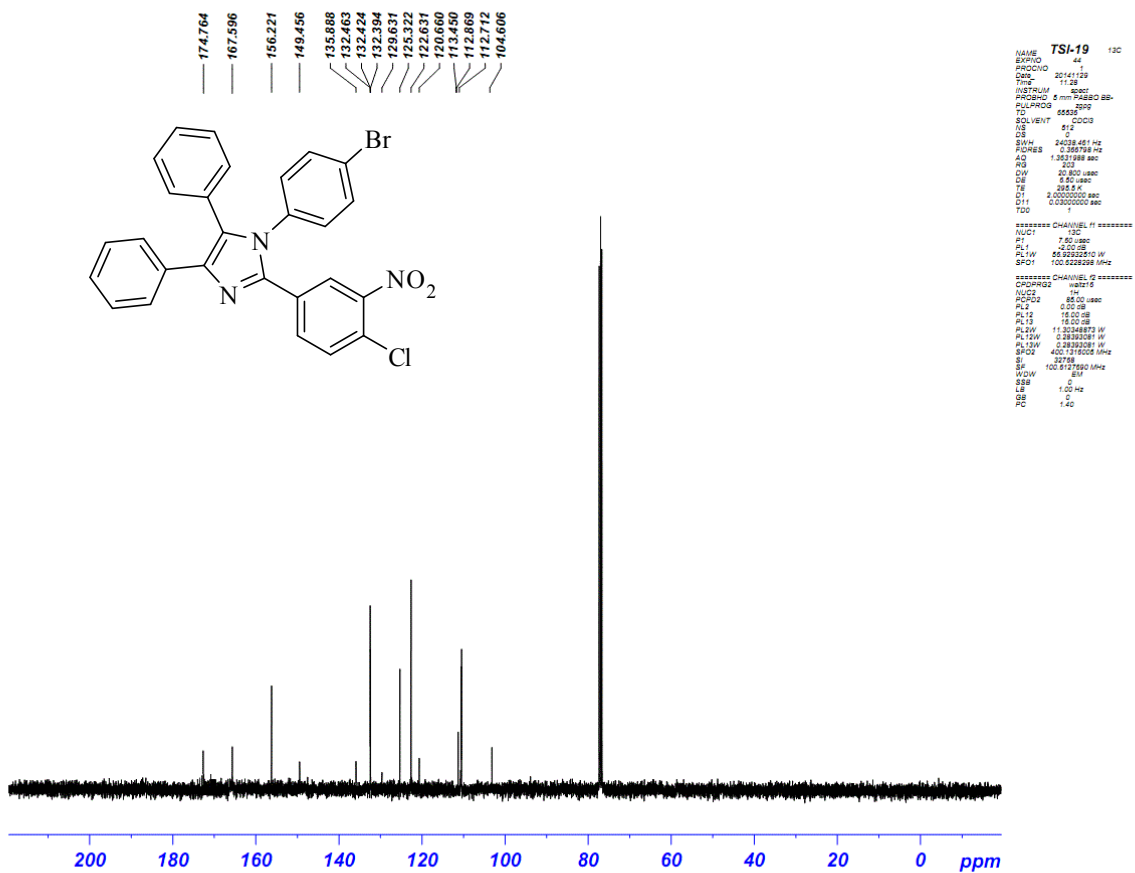

**Fig. S77.** The  $^{13}\text{C}$  NMR spectrum of 1-(4-bromophenyl)-2-(4-chloro-3-nitrophenyl)-4,5-diphenyl-1*H*-imidazole (Table 4, entry 12)

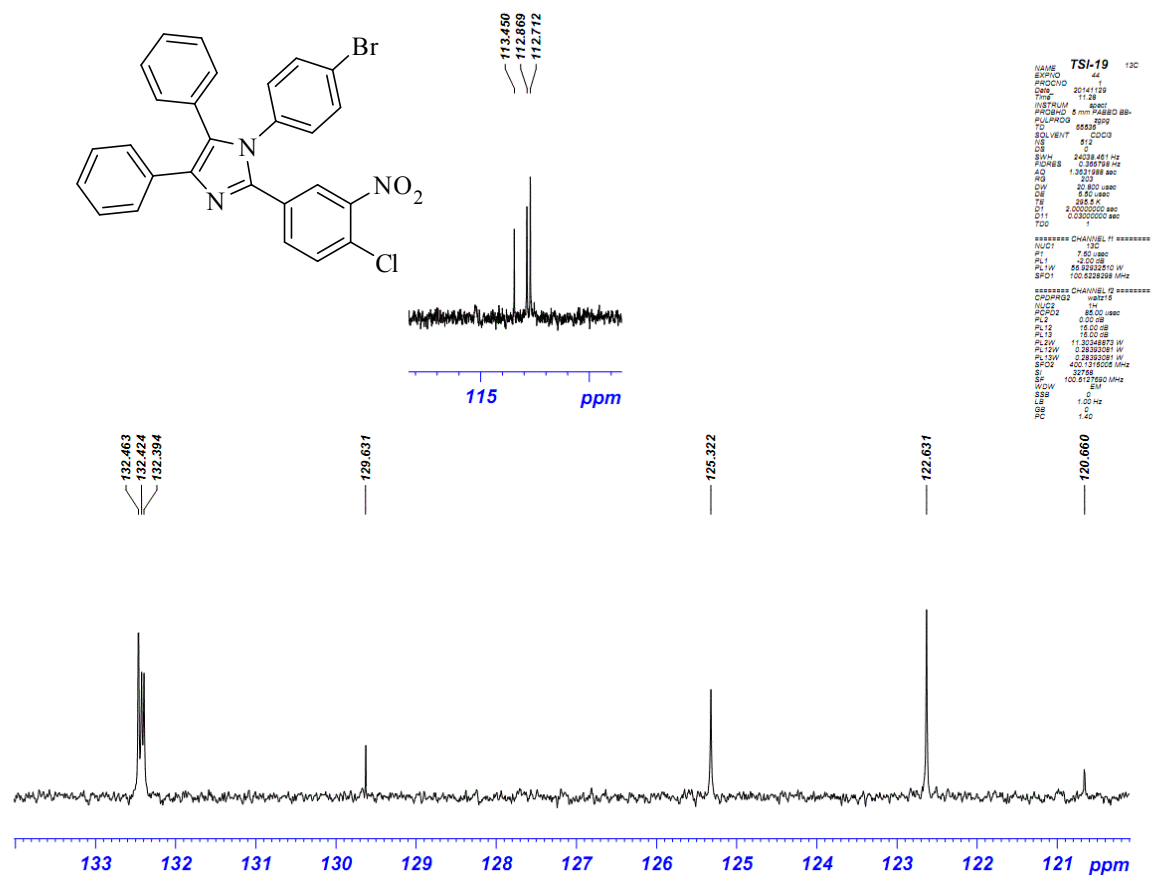

**Fig. S78.** The mass spectrum of 1-(4-bromophenyl)-2-(4-chloro-3-nitrophenyl)-4,5-diphenyl-1*H*-imidazole (Table 4, entry 12)

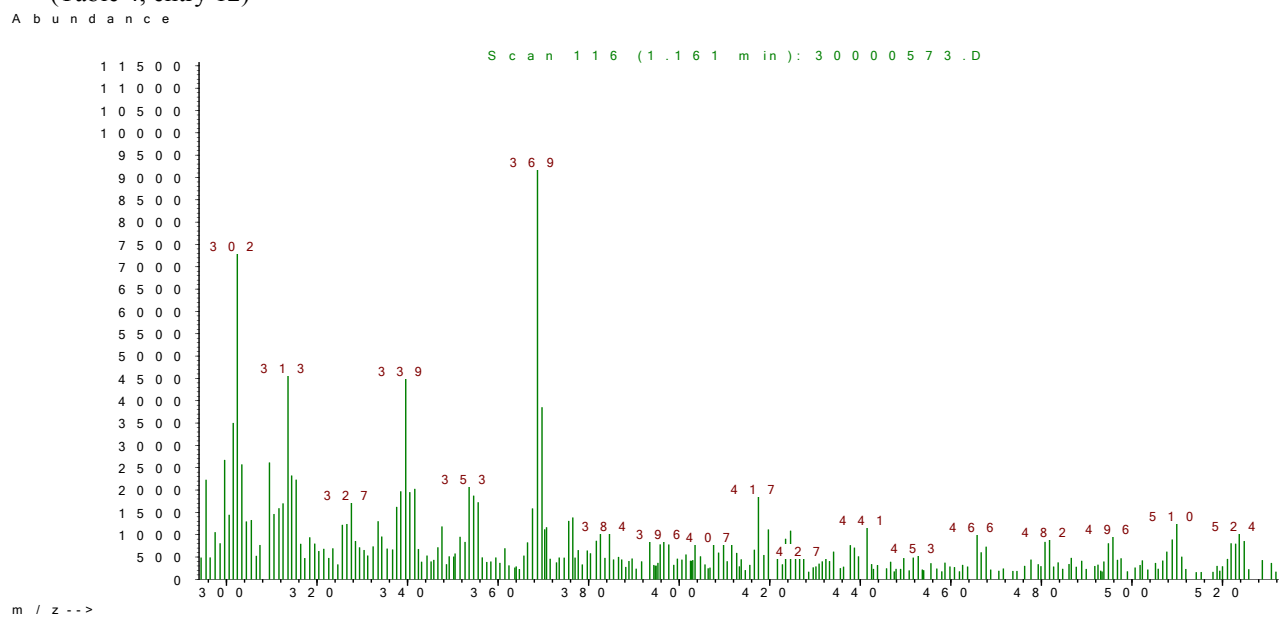

**Fig. S79.** The IR spectrum of 2-(biphenyl-4-yl)-1-(4-bromophenyl)-4,5-diphenyl-1*H*-imidazole (Table 4, entry 13)

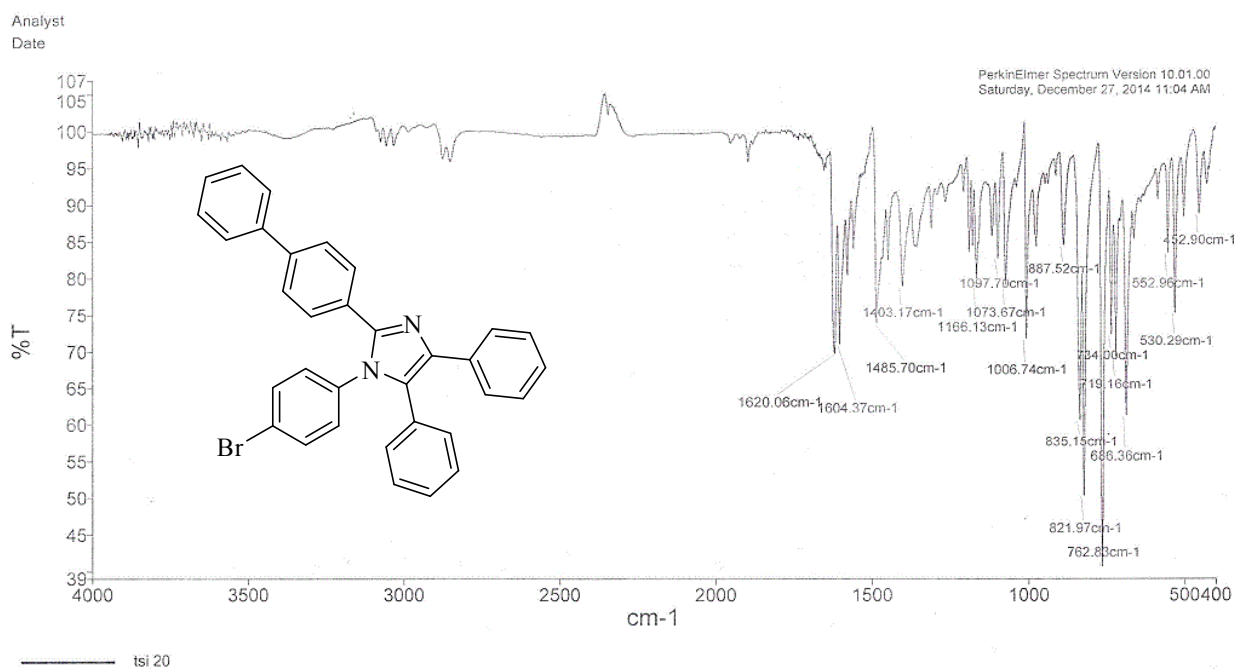

**Fig. S80.** The  $^1\text{H}$  NMR spectrum of 2-(biphenyl-4-yl)-1-(4-bromophenyl)-4,5-diphenyl-1*H*-imidazole (Table 4, entry 13)

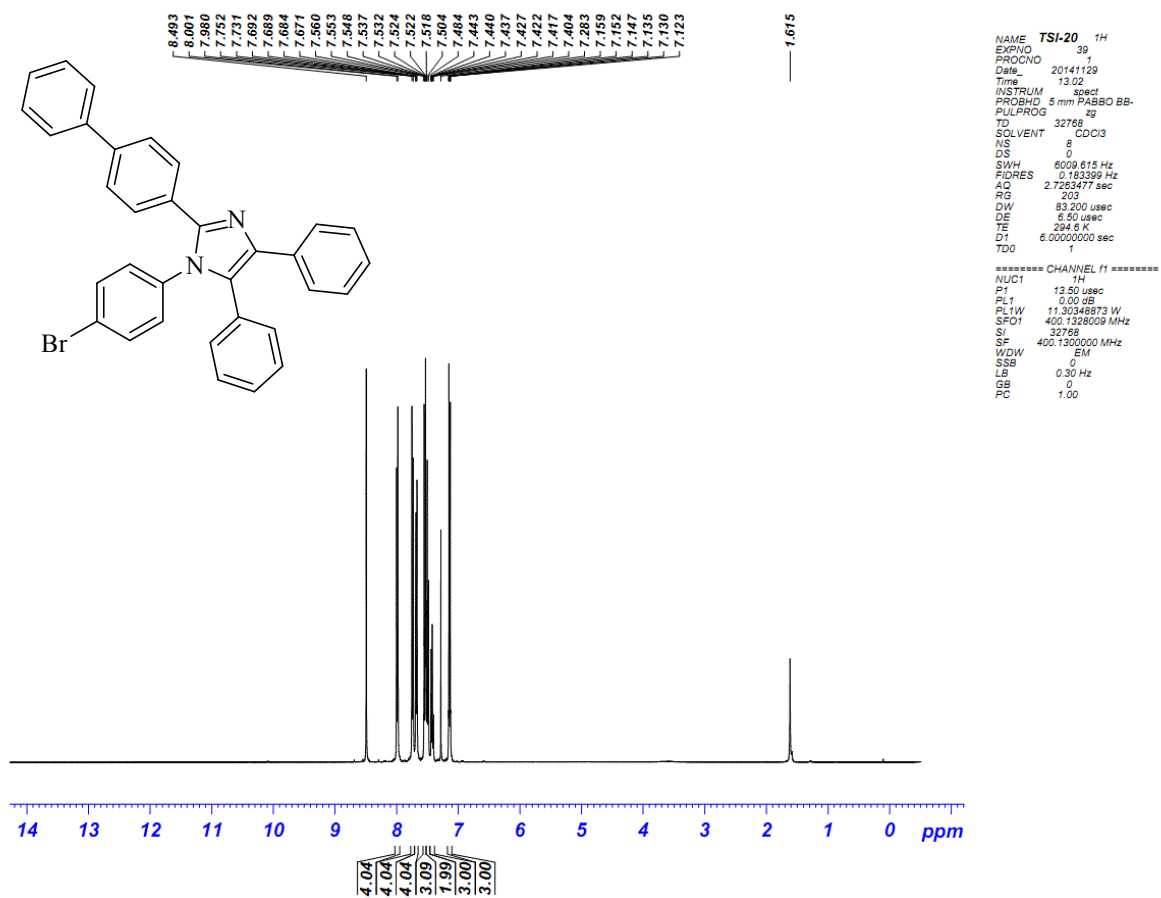

**Fig. S81.** The  $^1\text{H}$  NMR spectrum of 2-(biphenyl-4-yl)-1-(4-bromophenyl)-4,5-diphenyl-1*H*-imidazole (Table 4, entry 13)

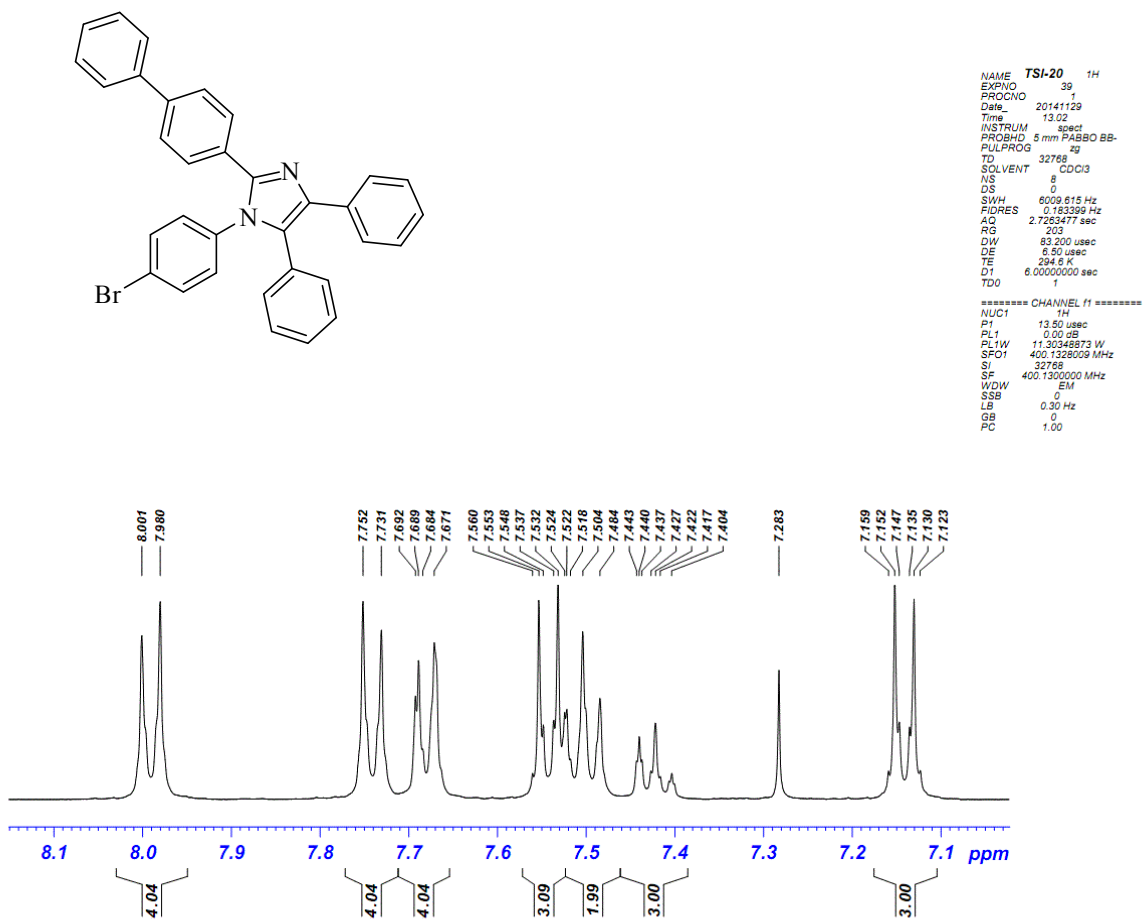

**Fig. S82.** The  $^{13}\text{C}$  NMR spectrum of 2-(biphenyl-4-yl)-1-(4-bromophenyl)-4,5-diphenyl-1*H*-imidazole (Table 4, entry 13)

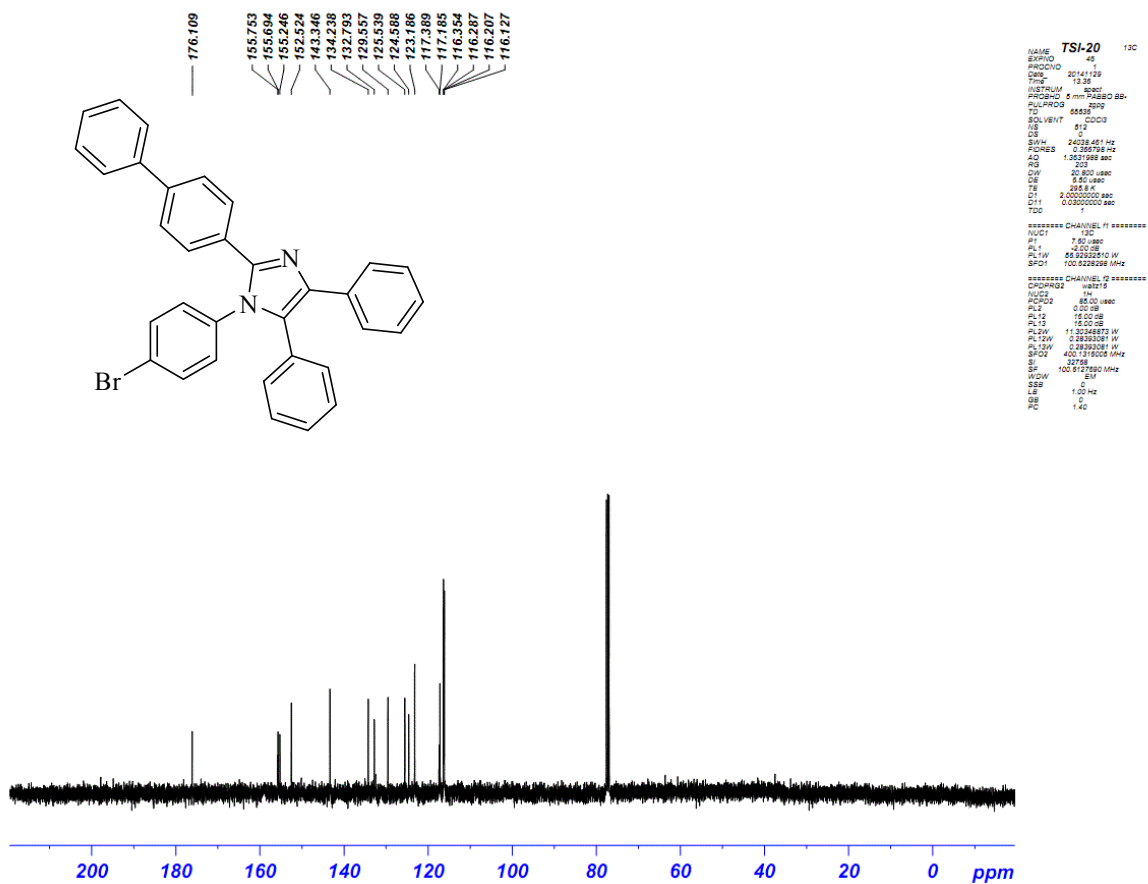

**Fig. S83.** The  $^{13}\text{C}$  NMR spectrum of 2-(biphenyl-4-yl)-1-(4-bromophenyl)-4,5-diphenyl-1*H*-imidazole (Table 4, entry 13)

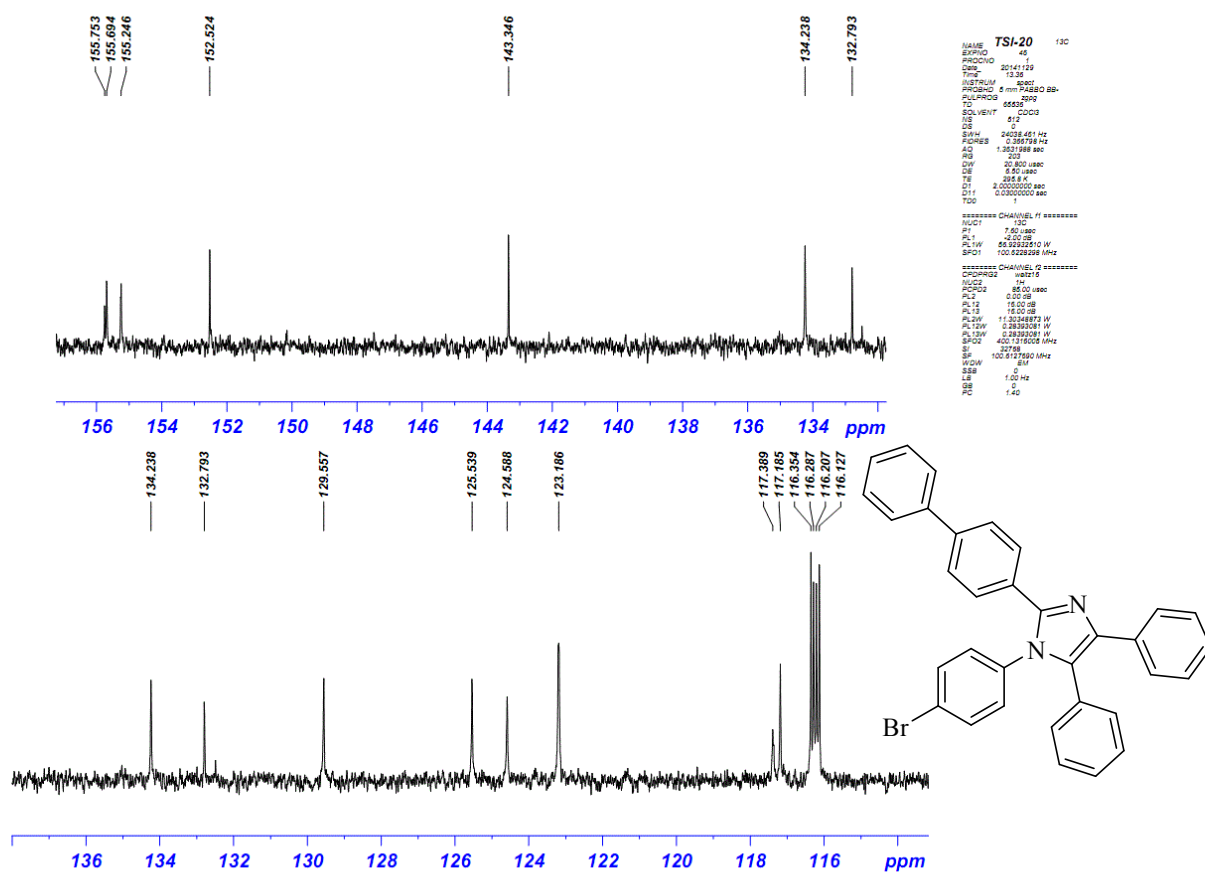

**Fig. S84.** The mass spectrum of 2-(biphenyl-4-yl)-1-(4-bromophenyl)-4,5-diphenyl-1*H*-imidazole (Table 4, entry 13)

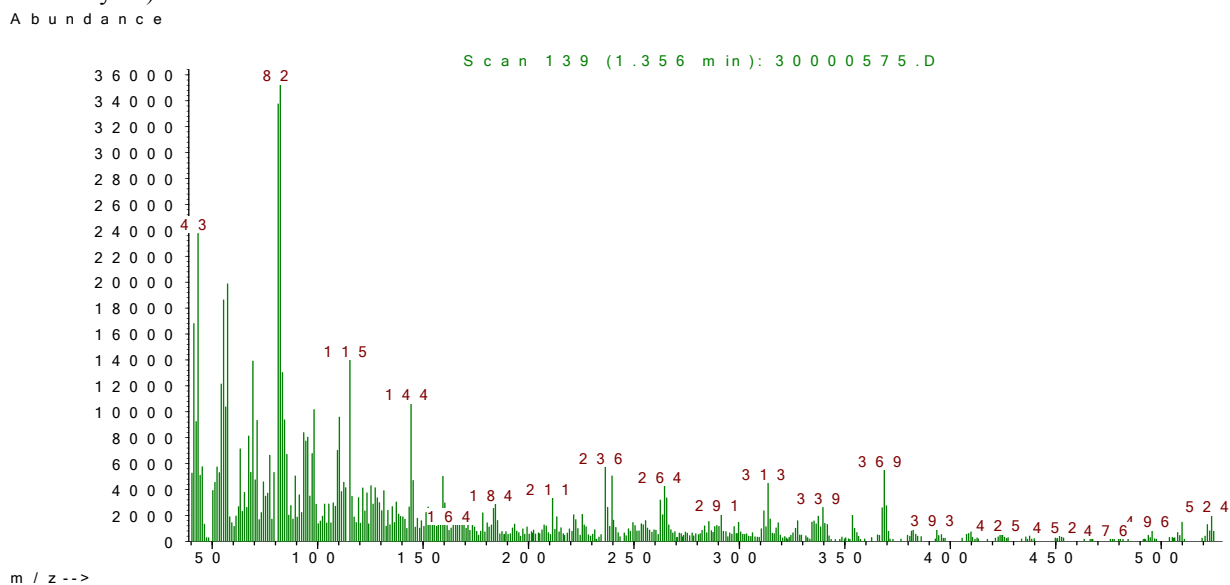

**Fig. S85.** The IR spectrum of 1-(4-bromophenyl)-2-(naphthalen-2-yl)-4,5-diphenyl-1*H*-imidazole (Table 4, entry 14)

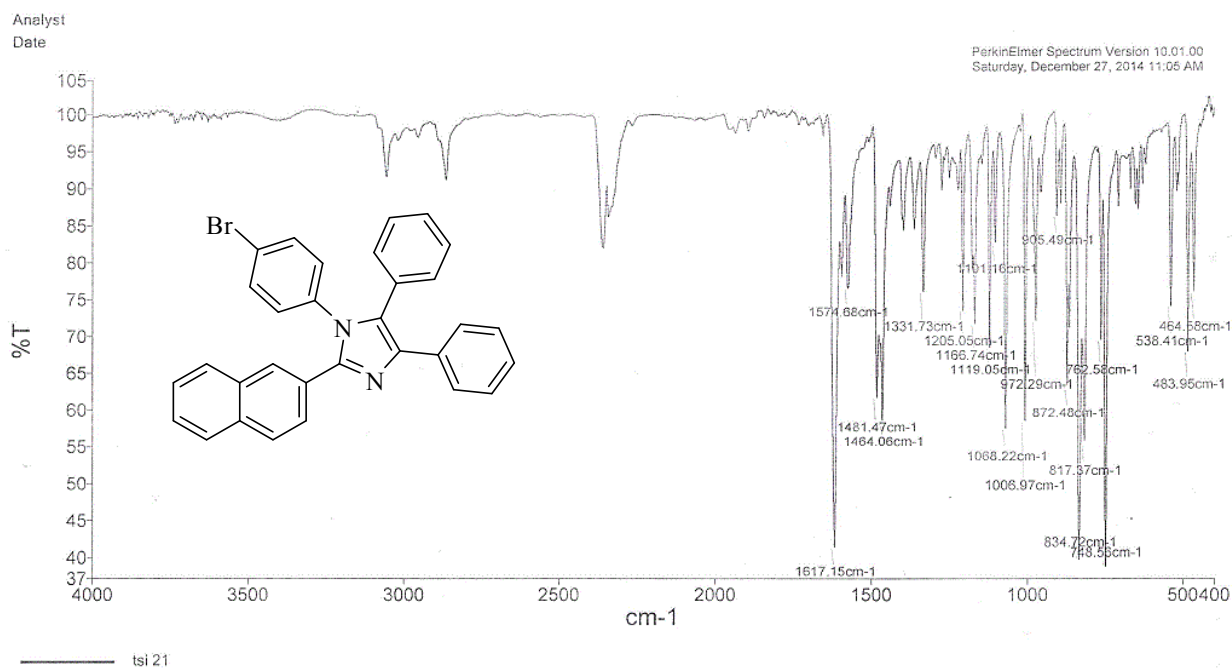



**Fig. S86.** The  $^1\text{H}$  NMR spectrum of 1-(4-bromophenyl)-2-(naphthalen-2-yl)-4,5-diphenyl-1*H*-imidazole (Table 4, entry 14)

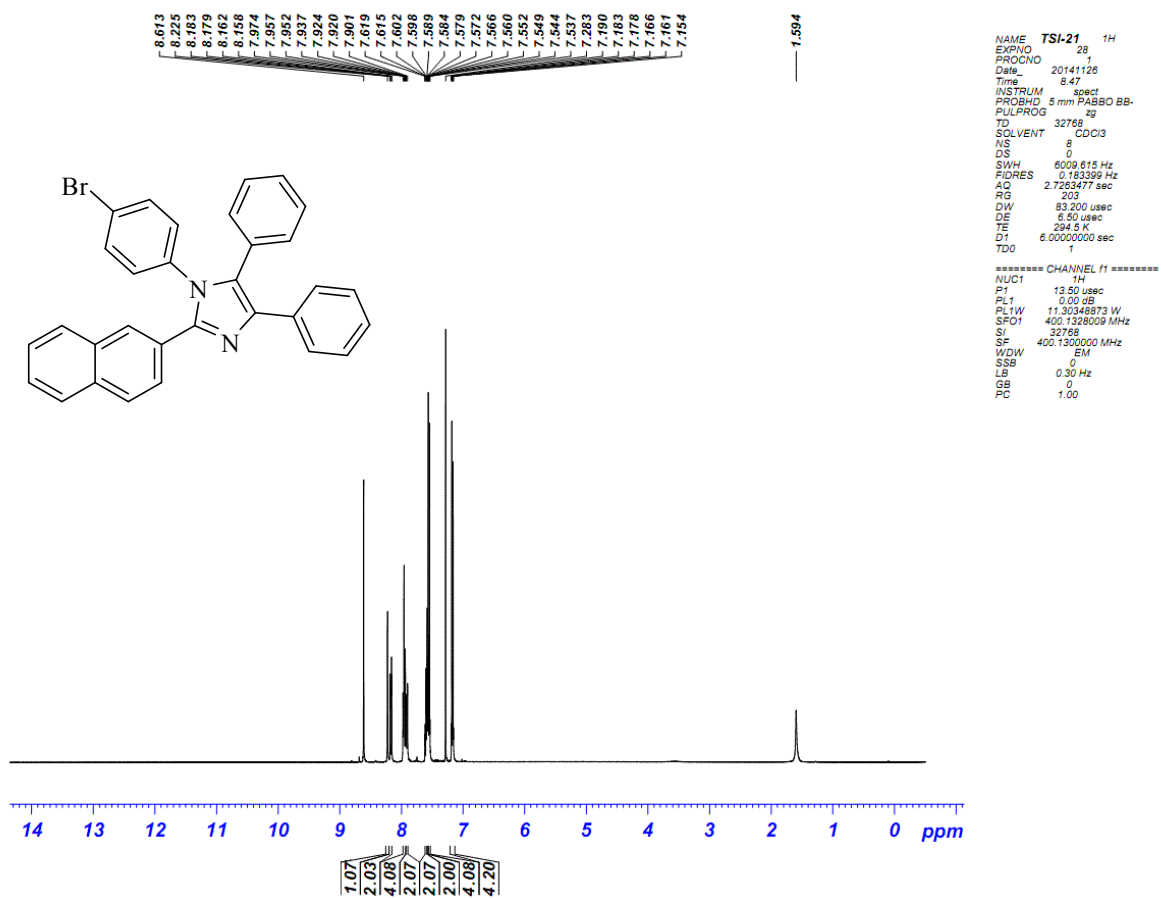

**Fig. S87.** The  $^1\text{H}$  NMR spectrum of 1-(4-bromophenyl)-2-(naphthalen-2-yl)-4,5-diphenyl-1*H*-imidazole (Table 4, entry 14)

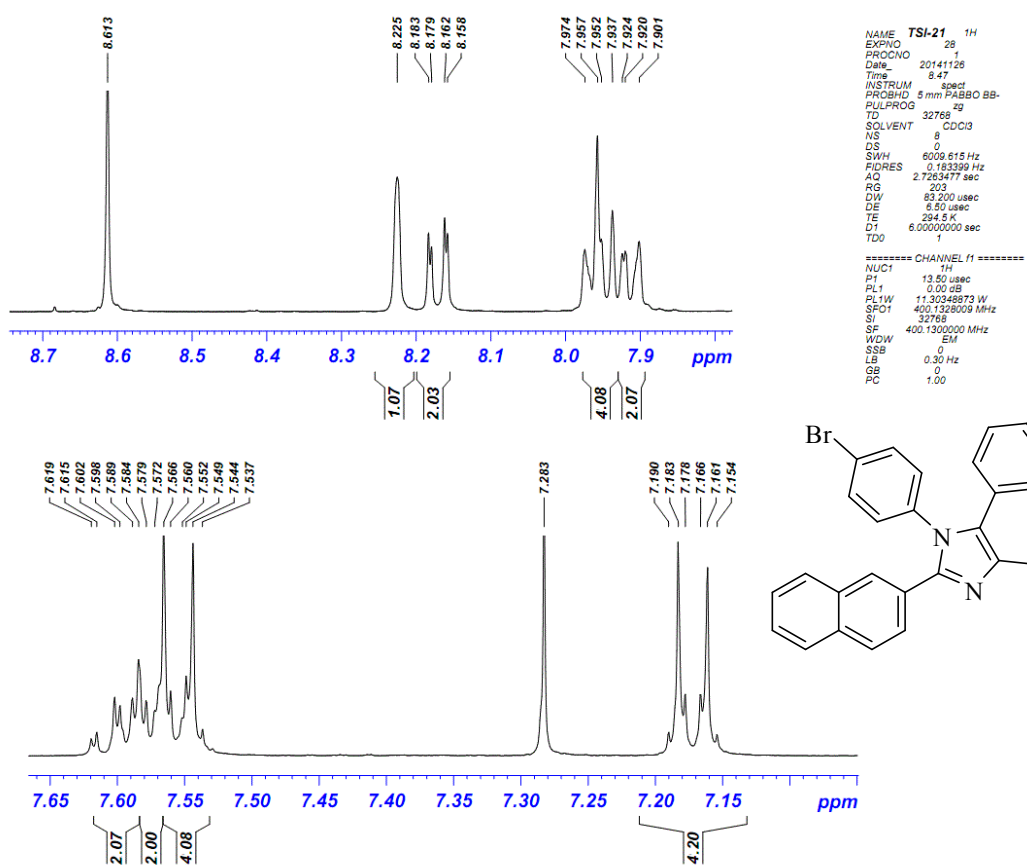

**Fig. S88.** The  $^{13}\text{C}$  NMR spectrum of 1-(4-bromophenyl)-2-(naphthalen-2-yl)-4,5-diphenyl-1*H*-imidazole (Table 4, entry 14)

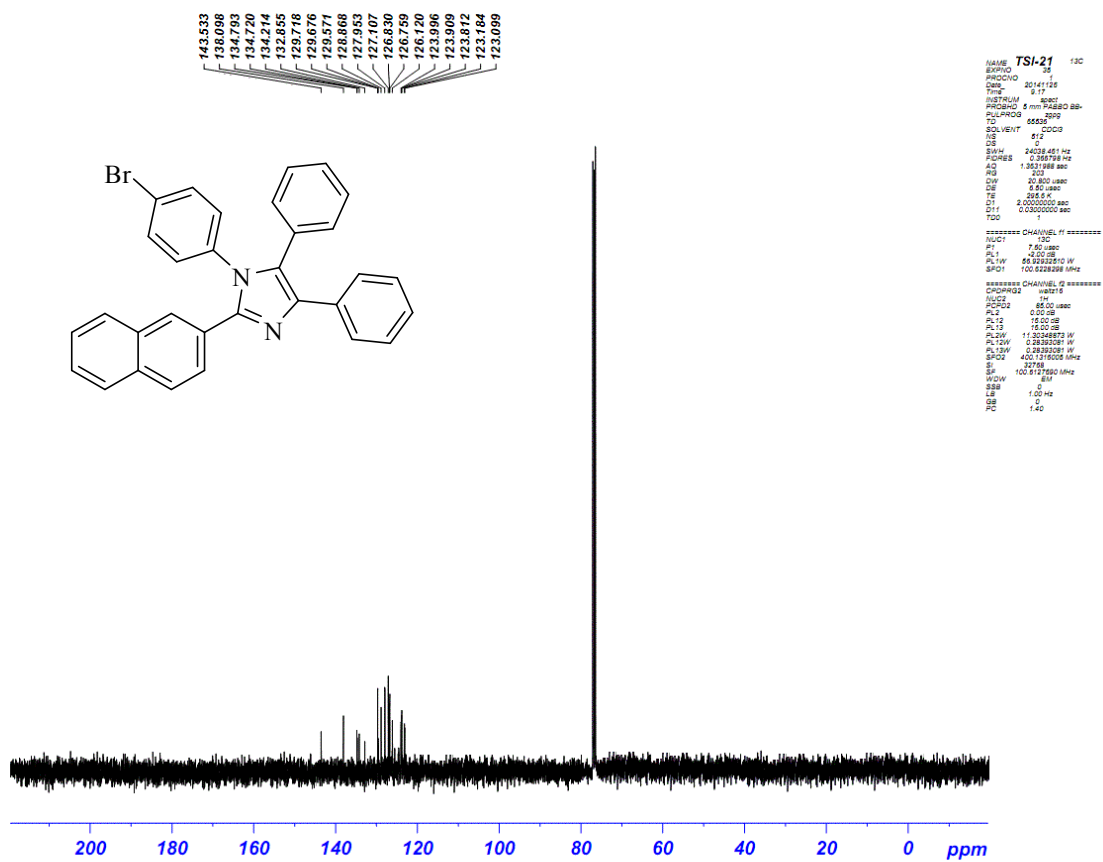

**Fig. S89.** The  $^{13}\text{C}$  NMR spectrum of 1-(4-bromophenyl)-2-(naphthalen-2-yl)-4,5-diphenyl-1*H*-imidazole (Table 4, entry 14)

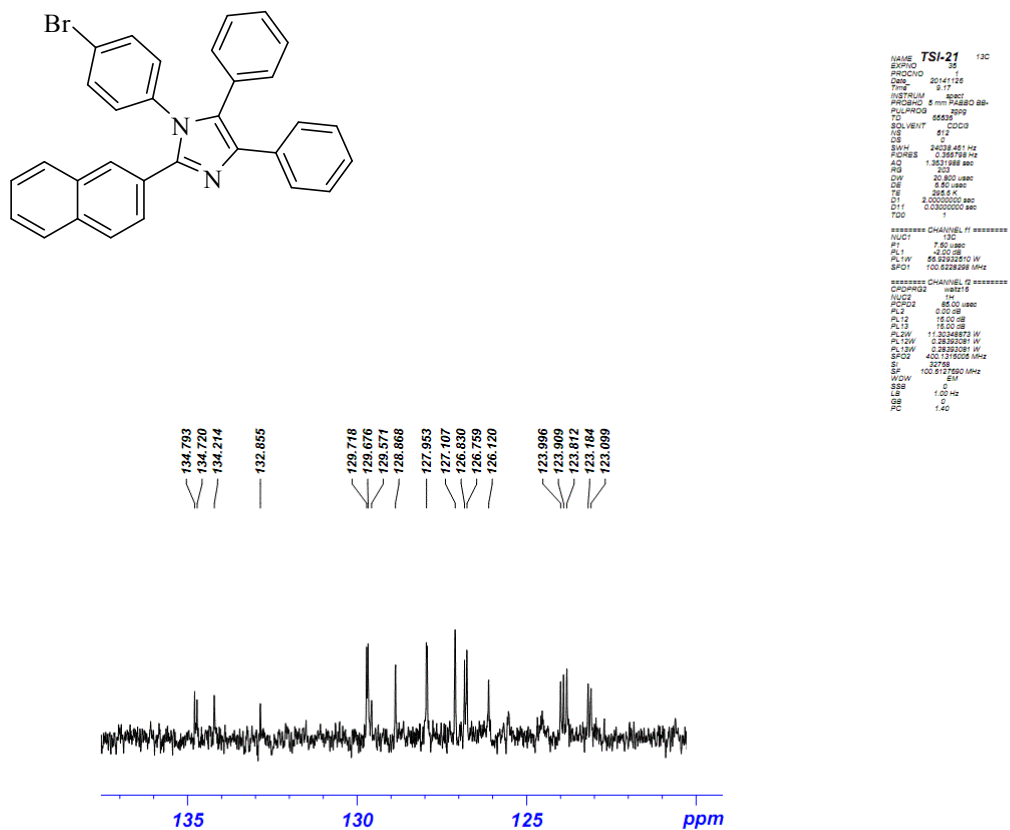

**Fig. S90.** The mass spectrum of 1-(4-bromophenyl)-2-(naphthalen-2-yl)-4,5-diphenyl-1*H*-imidazole (Table 4, entry 14)

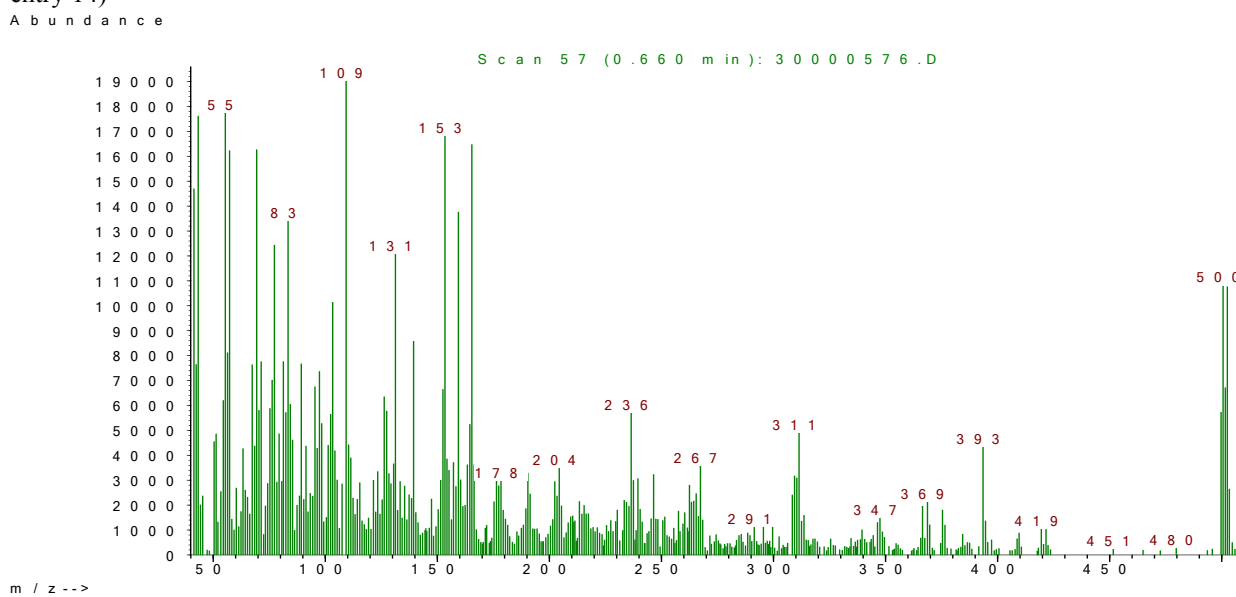

Supplement: c5ra03241e1.pdf [file c5ra03241e1.pdf]
